# Supplementary material for: Investigation of a bacteriochlorin-containing pentad array for panchromatic light-harvesting and charge separation
Source: Royal Society of Chemistry journal article supplement (doi:10.1039/d2cp05400k), 2023-01-01
Supplement: d2cp05400k1.pdf [file d2cp05400k1.pdf]

**Supplementary Information**

**for**

**Investigation of a Bacteriochlorin-Containing Pentad Array for  
Panchromatic Light-Harvesting and Charge Separation**

Haoyu Jing,<sup>1</sup> Nikki Cecil M. Magdaong,<sup>2</sup> James R. Diers,<sup>3</sup>

Christine Kirmaier,<sup>2</sup> David F. Bocian,<sup>3</sup> Dewey Holten,<sup>2</sup> and Jonathan S. Lindsey<sup>1</sup>

<sup>1</sup> Department of Chemistry  
North Carolina State University  
Raleigh, North Carolina 27695-8204  
E-mail: [jlindsey@ncsu.edu](mailto:jlindsey@ncsu.edu)

<sup>2</sup> Department of Chemistry  
Washington University  
St. Louis, Missouri 63130-4889  
E-mail: [holten@wustl.edu](mailto:holten@wustl.edu)

<sup>3</sup> Department of Chemistry  
University of California  
Riverside, California 92521-0403  
E-mail: [david.bocian@ucr.edu](mailto:david.bocian@ucr.edu)

## Table of Contents

| <b>Item</b>                                                                                          | <b>Page</b> |
|------------------------------------------------------------------------------------------------------|-------------|
| <b>Figure S1.</b> NMR spectrum of <b>MeOBC-1</b> .....                                               | S3          |
| <b>Figure S2.</b> NMR spectrum of <b>MeOBC-1</b> .....                                               | S4          |
| <b>Figure S3.</b> NMR spectrum of <b>MeOBC-1</b> .....                                               | S5          |
| <b>Figure S4.</b> TA summary for <b>BC-T-PDI</b> in toluene, PhCN, and DMSO, 745 nm exc .....        | S6          |
| <b>Figure S5.</b> TA summary for <b>BC-T-PDI</b> in toluene, PhCN, and DMSO, 420 nm exc .....        | S7          |
| <b>Figure S6.</b> TA spectra for <b>BC-T-PDI</b> in toluene.....                                     | S8          |
| <b>Figure S7.</b> TA kinetic profiles for <b>BC-T-PDI</b> in toluene .....                           | S9          |
| <b>Figure S8.</b> TA spectra for <b>BC-T-PDI</b> in PhCN .....                                       | S10         |
| <b>Figure S9.</b> TA kinetic profiles for <b>BC-T-PDI</b> in PhCN .....                              | S11         |
| <b>Figure S10.</b> TA spectra for <b>BC-T-PDI</b> in DMSO.....                                       | S12         |
| <b>Figure S11.</b> TA kinetic profiles for <b>BC-T-PDI</b> in DMSO .....                             | S13         |
| <b>Figure S12.</b> DADS summary for <b>BC-T-PDI</b> in toluene, PhCN, and DMSO, 745 nm exc ...       | S14         |
| <b>Figure S13.</b> DADS summary for <b>BC-T-PDI</b> in toluene, PhCN, and DMSO, 420 nm exc ...       | S15         |
| <b>Figure S14.</b> DADS for <b>BC-T-PDI</b> in toluene.....                                          | S16         |
| <b>Figure S15.</b> DADS for <b>BC-T-PDI</b> in PhCN.....                                             | S17         |
| <b>Figure S16.</b> DADS for <b>BC-T-PDI</b> in DMSO .....                                            | S18         |
| <b>Figure S17.</b> MO energies for arrays in toluene and DMSO.....                                   | S19         |
| <b>Table S1.</b> MOs for <b>BC-T-PDI</b> in toluene.....                                             | S20         |
| <b>Table S2.</b> MOs for <b>BC-T-PDI</b> in DMSO .....                                               | S28         |
| <b>Table S3.</b> MOs for <b>MeOBC-1</b> in toluene.....                                              | S36         |
| <b>Table S4.</b> TDDFT results for <b>BC-T-PDI</b> in toluene.....                                   | S38         |
| <b>Table S5.</b> TDDFT results for <b>BC-T-PDI</b> in DMSO .....                                     | S41         |
| <b>Table S6.</b> TDDFT results for <b>MeO-BC-1</b> in toluene.....                                   | S43         |
| <b>Figure S18.</b> Calc vs measured spectra and red-region NTOs for <b>BC-T-PDI</b> in toluene.....  | S46         |
| <b>Figure S19.</b> Calc vs measured spectra and green-region NTOs for <b>BC-T-PDI</b> in toluene...  | S47         |
| <b>Figure S20.</b> Calc vs measured spectra and blue-region NTOs for <b>BC-T-PDI</b> in toluene..... | S48         |
| <b>Figure S21.</b> Calc vs measured spectra and NTOs for <b>BC-T-PDI</b> in toluene vs DMSO .....    | S49         |
| <b>Figure S22.</b> Calc vs measured spectra and NTOs for <b>MeOBC-1</b> in toluene.....              | S50         |
| <b>Table S7.</b> NTOs for <b>BC-T-PDI</b> in toluene .....                                           | S51         |
| <b>Table S8.</b> NTOs for <b>BC-T-PDI</b> in DMSO .....                                              | S63         |
| <b>Table S9.</b> NTOs for <b>MeOBC-1</b> in toluene .....                                            | S74         |

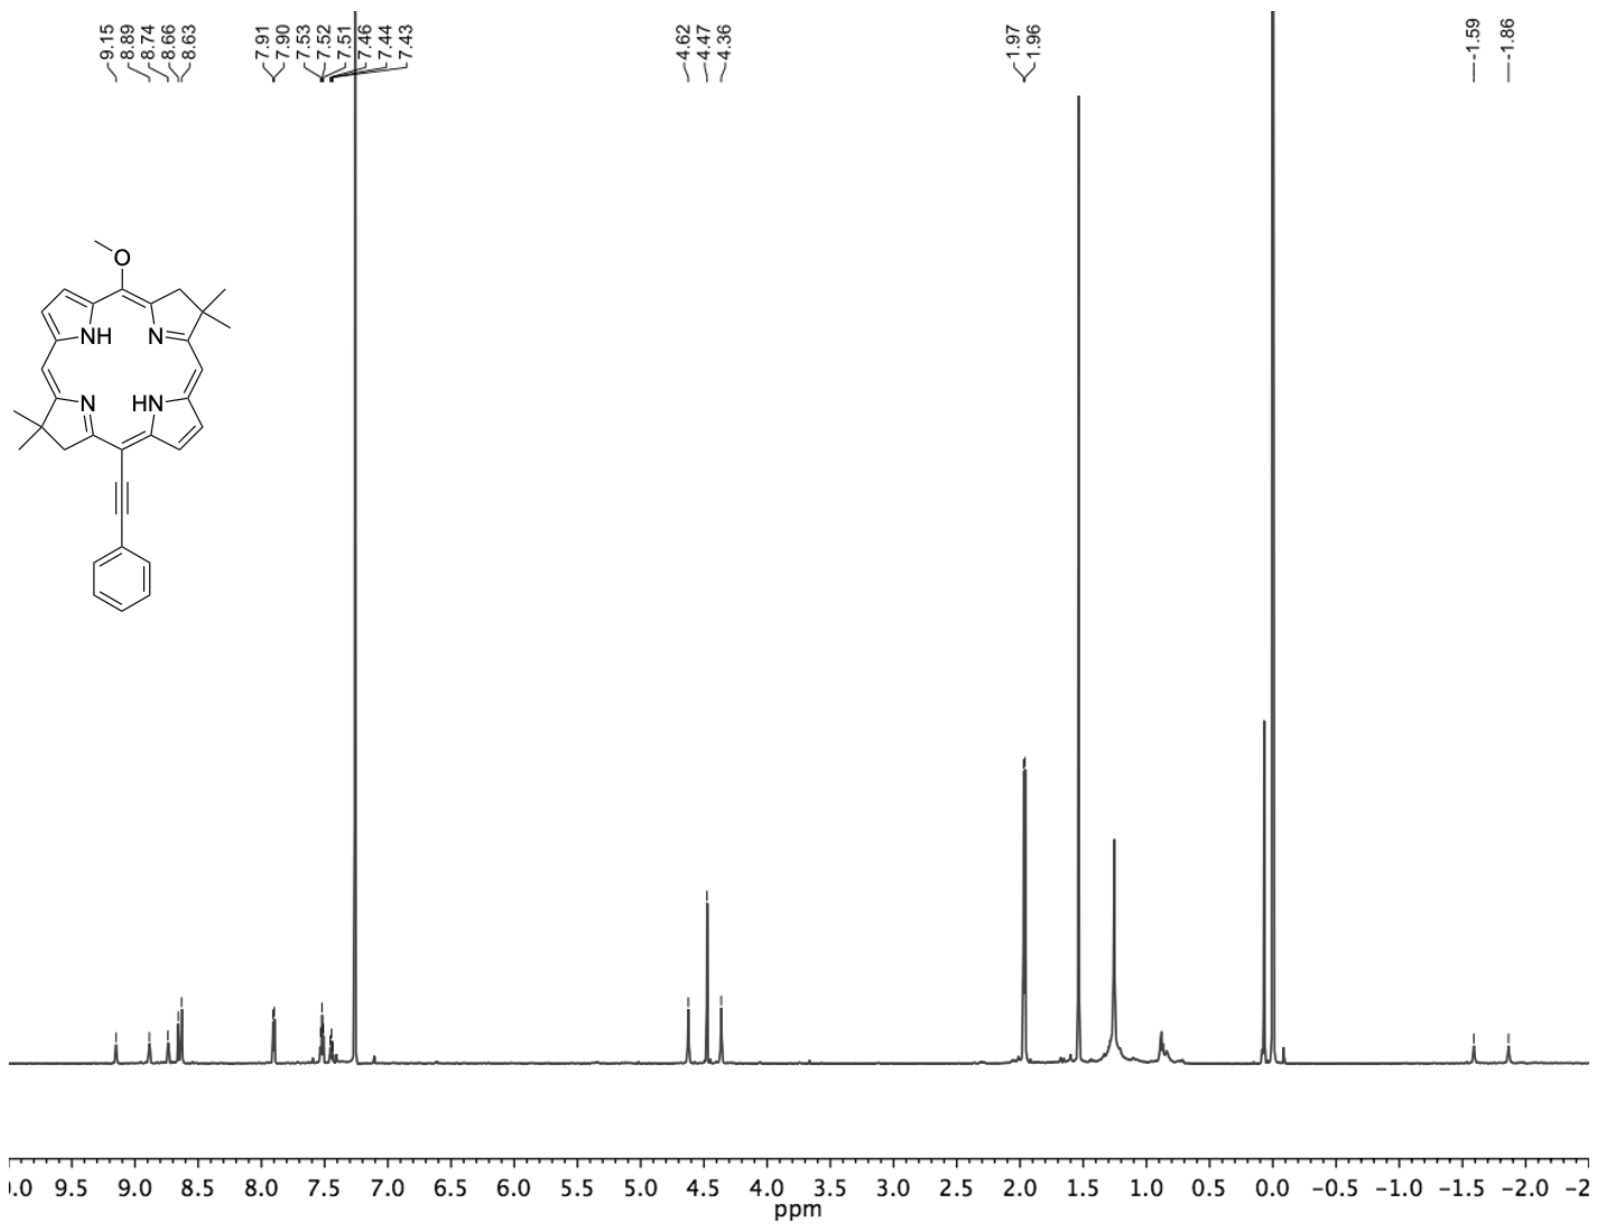

**Figure S1.** <sup>1</sup>H NMR spectrum of MeOBC-1.

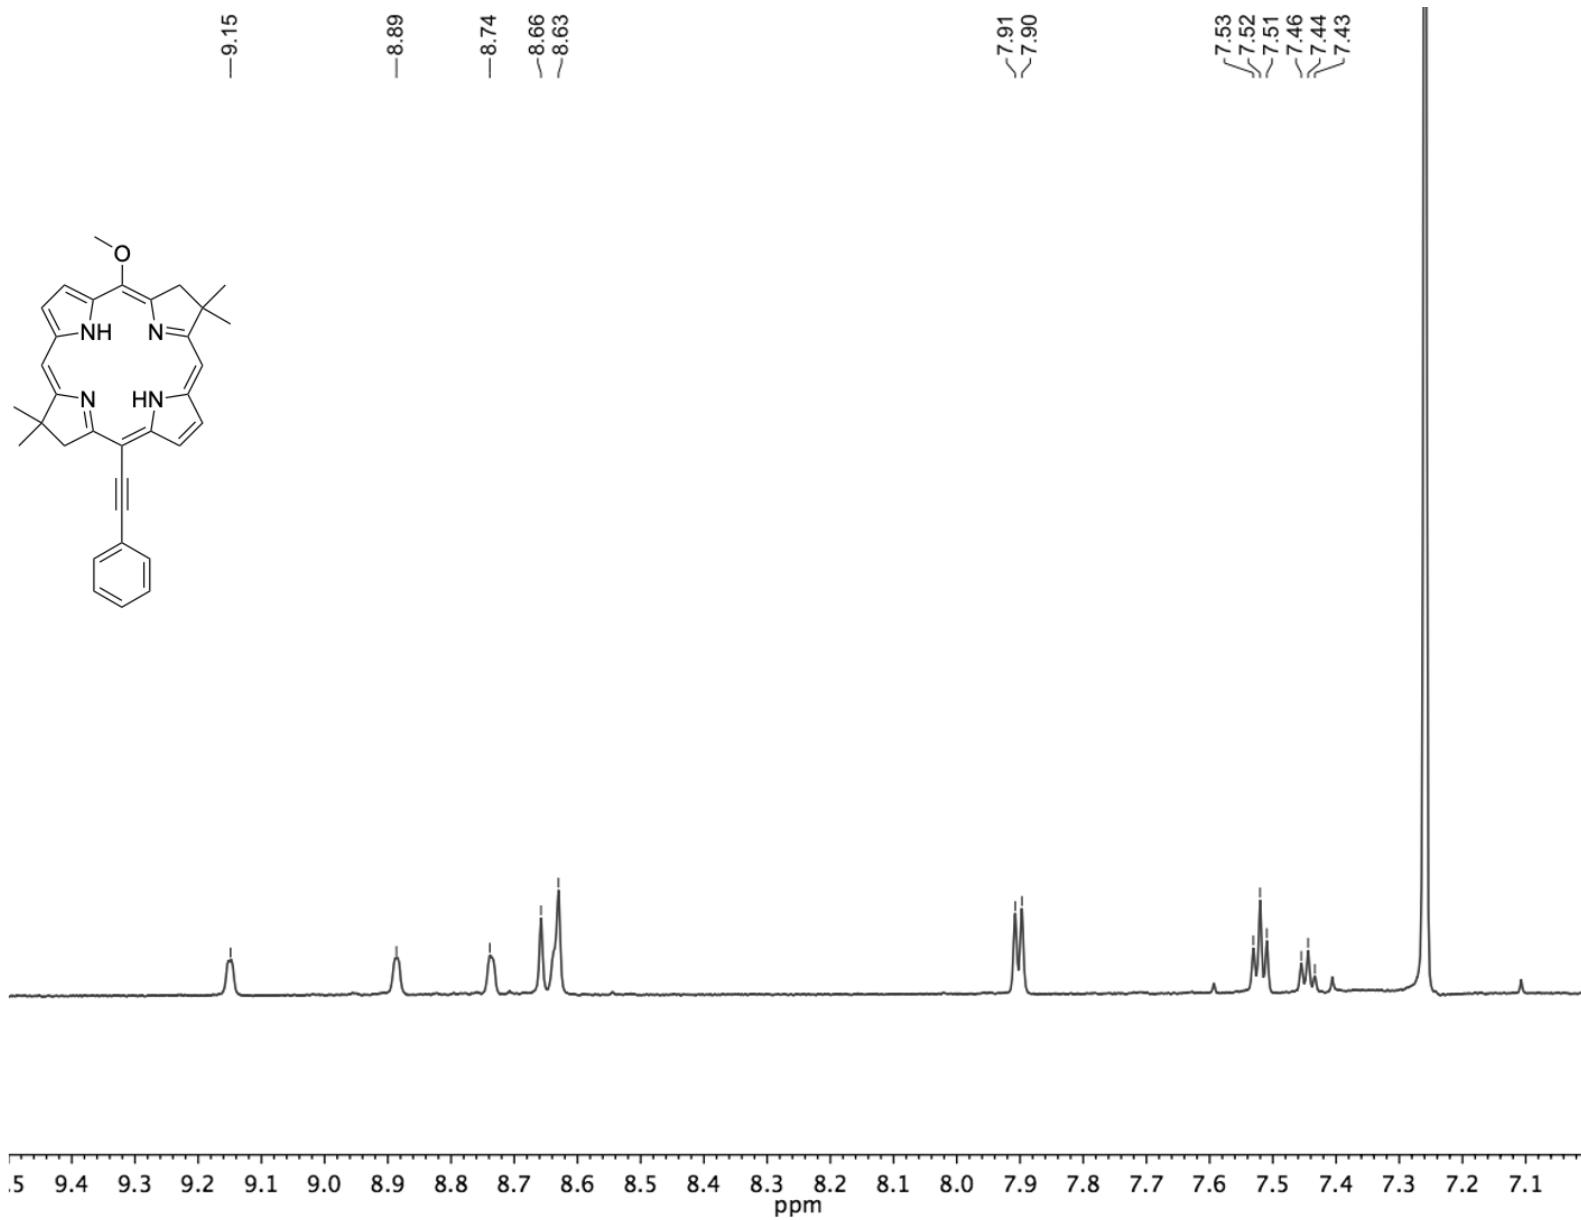

**Figure S2.** <sup>1</sup>H NMR spectrum of MeOBC-1.



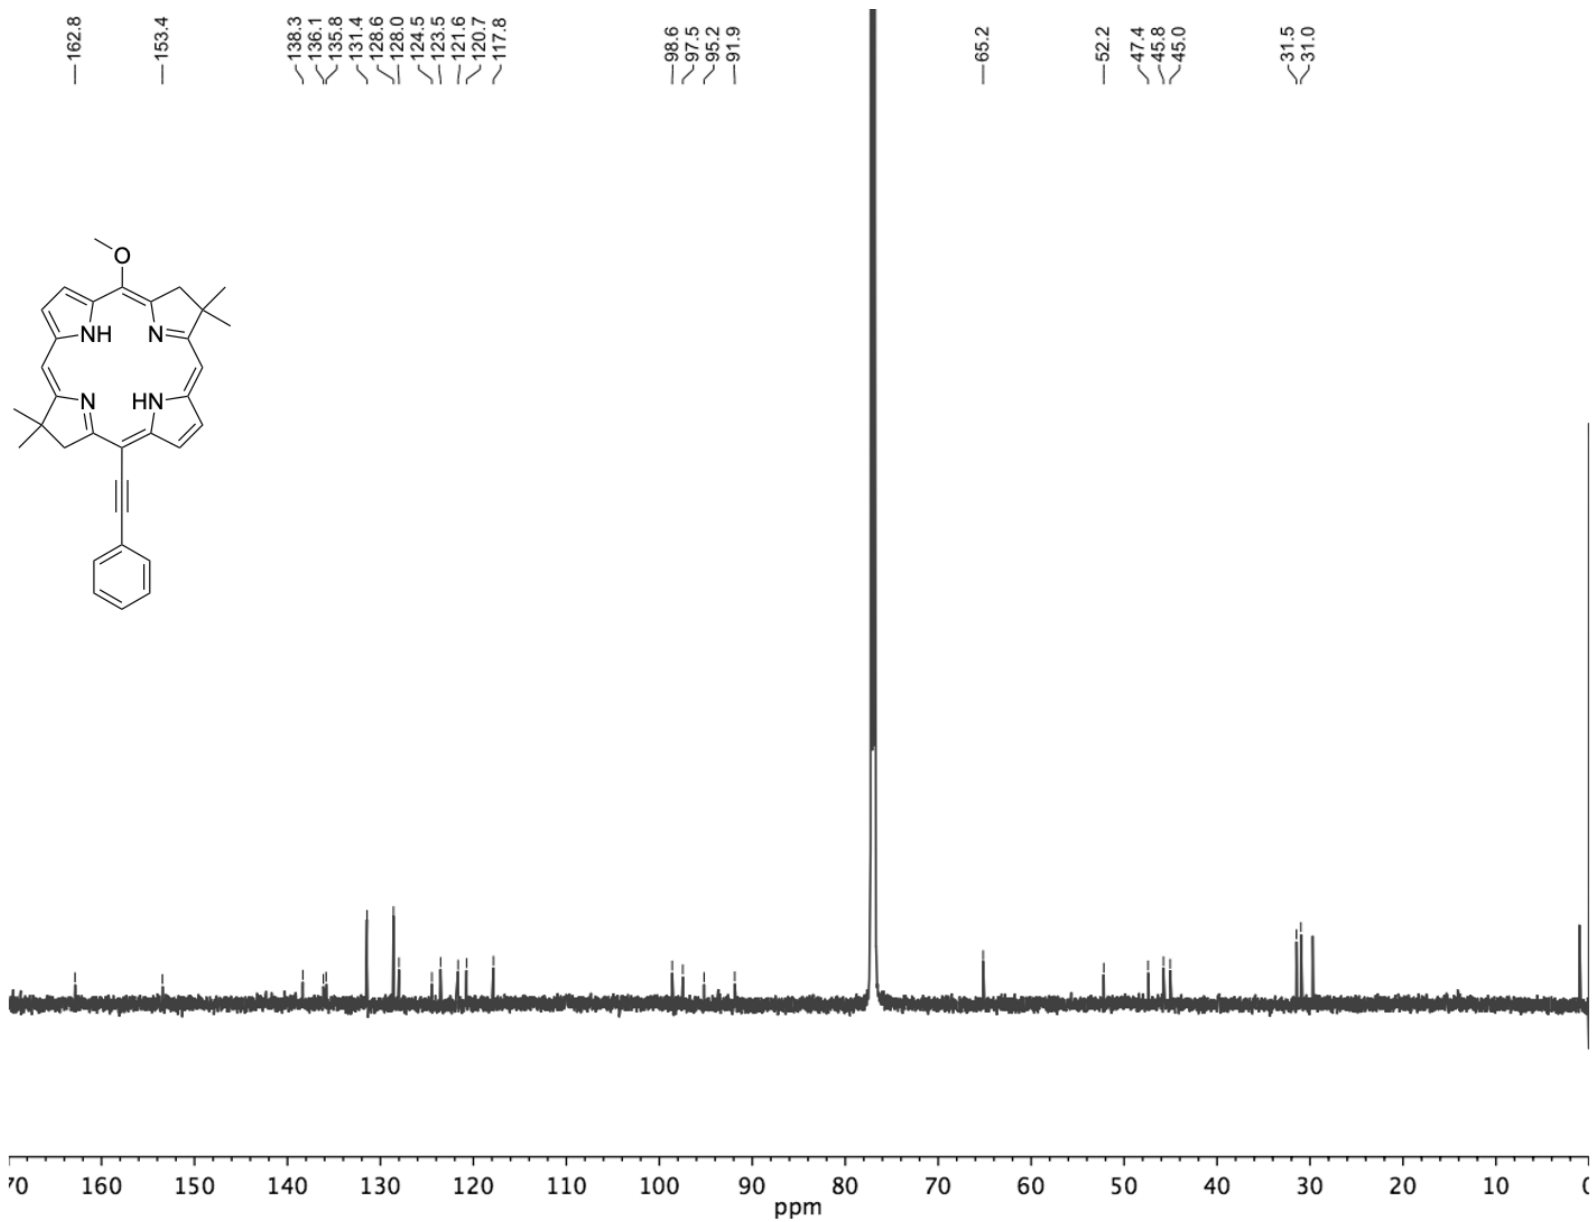

Figure S3.  $^{13}\text{C}\{^1\text{H}\}$  NMR spectrum of MeOBC-1.

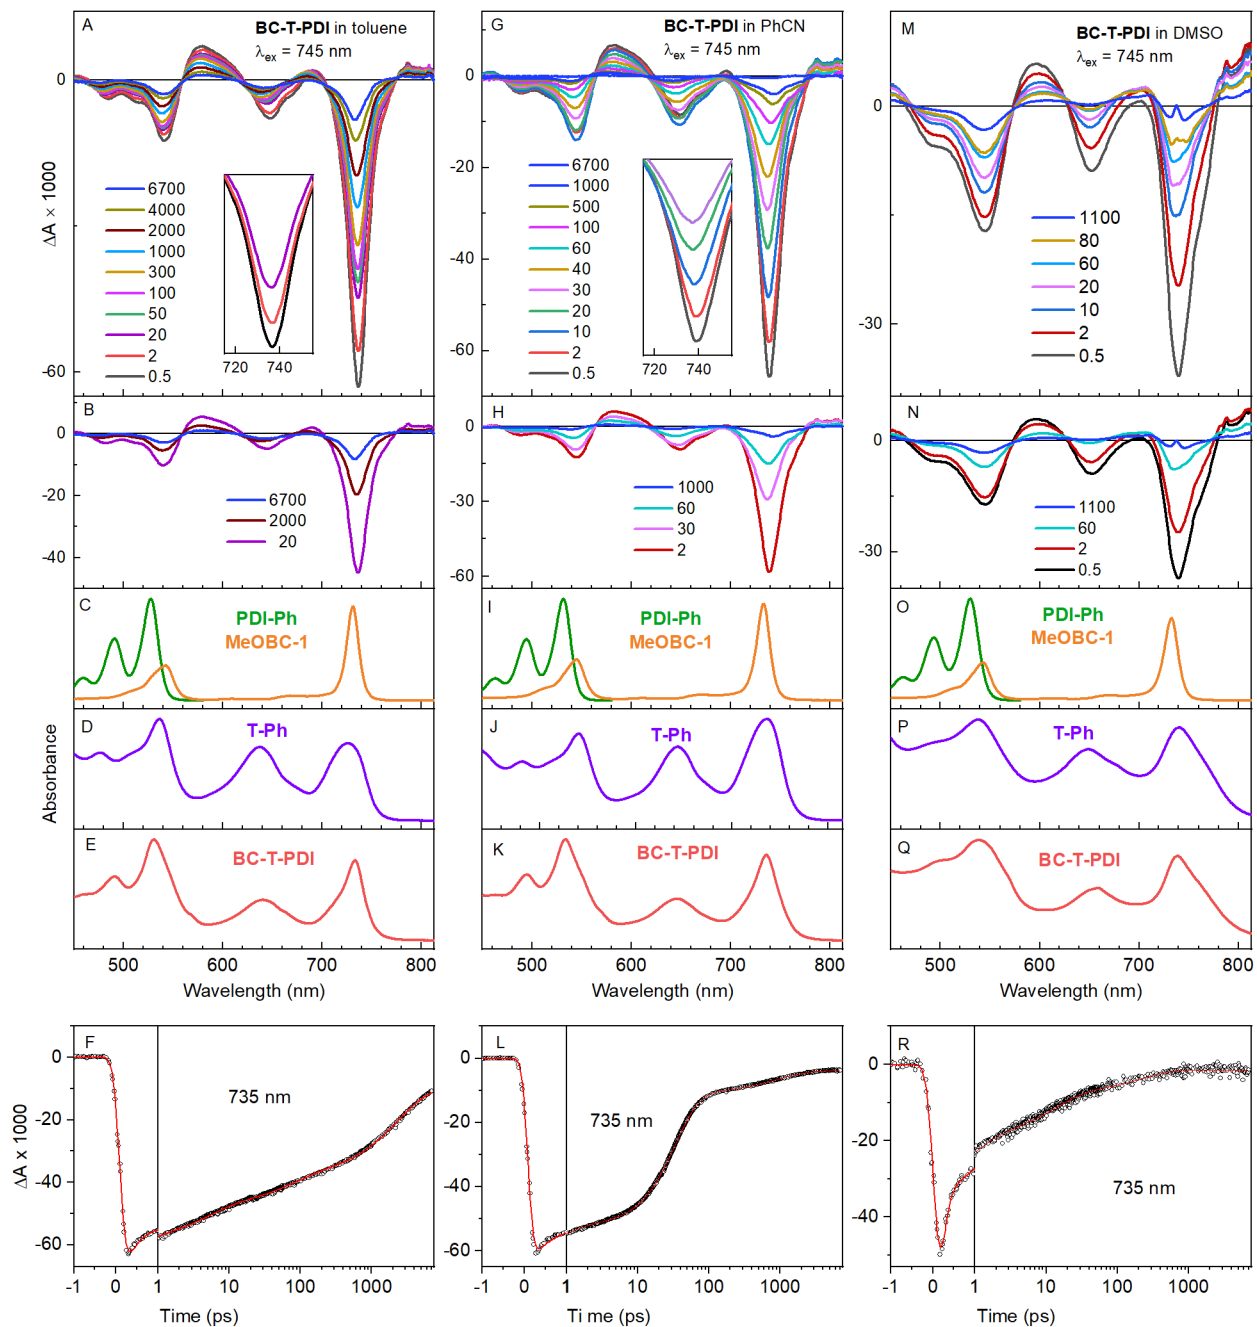

**Figure S4.** TA data for pentad **BC-T-PDI** in toluene (left), PhCN (middle), and DMSO (right). For each column of data, the top two panels show TA data at various times after excitation with a 100-fs flash at 745 nm; the middle three panels show ground-state absorption spectra of monomers **PDI-Ph** and **MeOBC-1**, benchmark triad **T-Ph** and the pentad; the bottom panel shows a kinetic profile for decay of combined  $S_0 \rightarrow S_1$  bleaching and  $S_1 \rightarrow S_0$  stimulated emission of the central panchromatic triad (T) of the pentad. The insets to panels A and G show evolution of this composite near-infrared feature at early times.

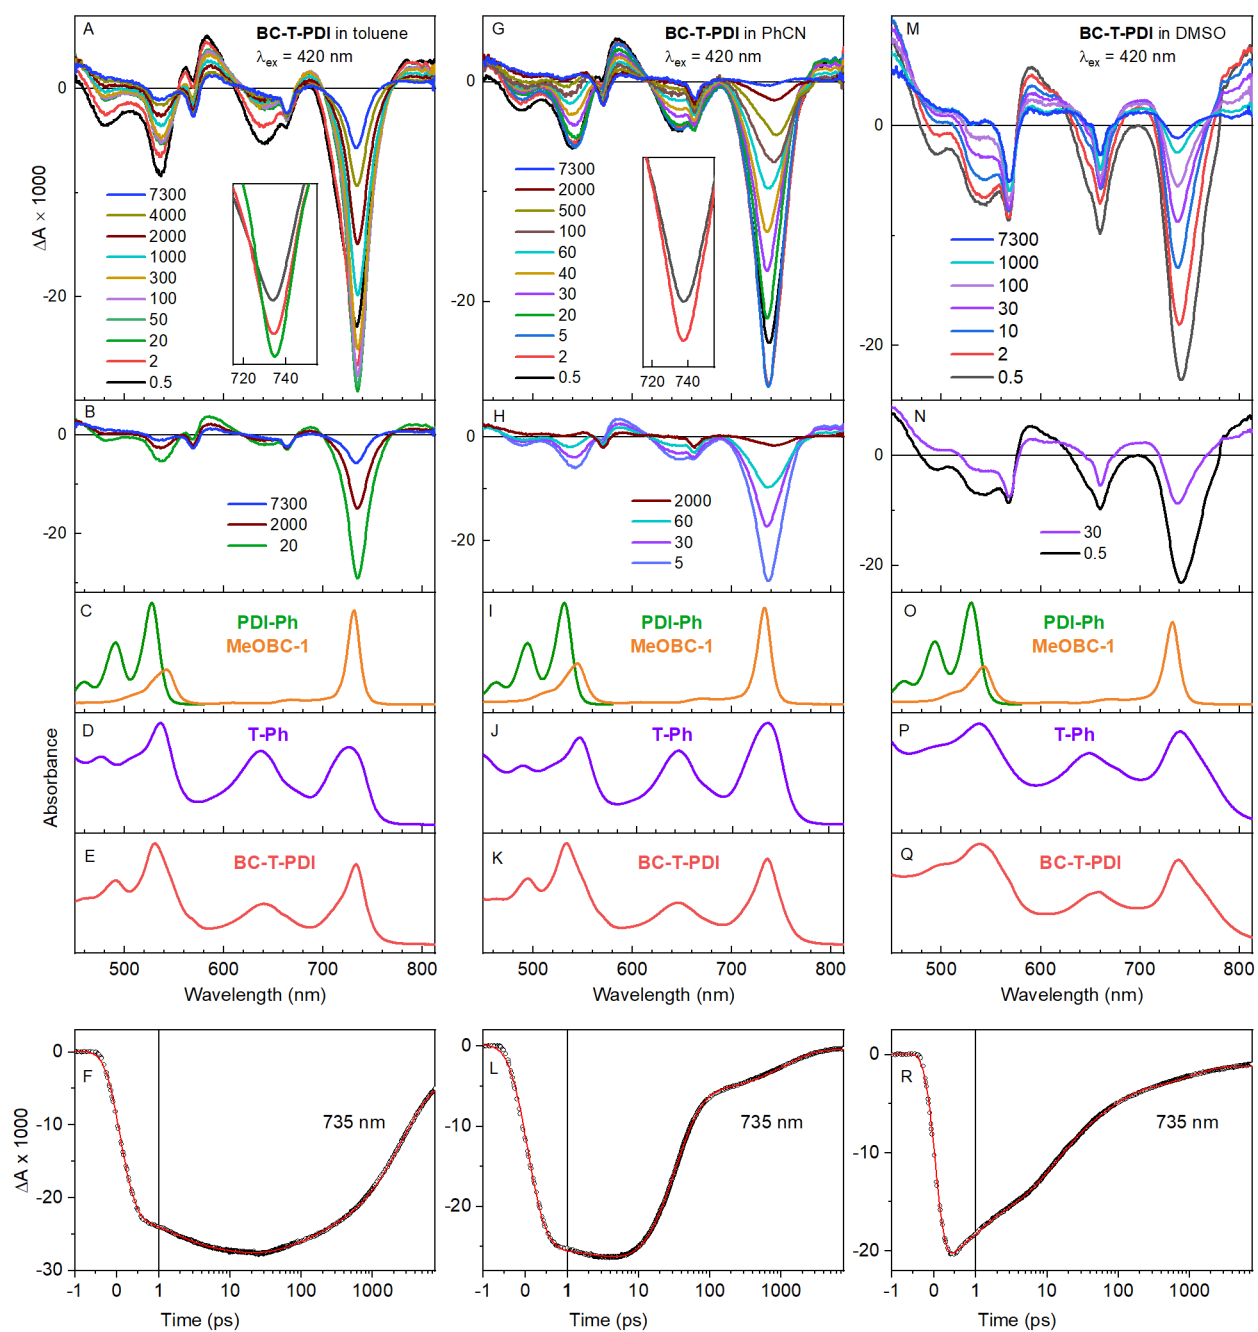

**Figure S5.** TA data for pentad **BC-T-PDI** in toluene (left), PhCN (middle), and DMSO (right). For each column of data, the top two panels show TA data at various times after excitation with a 100-fs flash at 420 nm; the middle three panels show ground-state absorption spectra of monomers **PDI-Ph** and **MeOBC-1**, benchmark triad **T-Ph** and the pentad; the bottom panel shows a kinetic profile for decay of combined  $S_0 \rightarrow S_1$  bleaching and  $S_1 \rightarrow S_0$  stimulated emission of the central panchromatic triad (T) of the pentad. The insets to panels A and G show evolution of this composite near-infrared feature at early times. The raw TA data obtained using 420 nm excitation flashes show small sharp features at  $\sim 570$  and  $\sim 660$  nm due to a small amount of putative chlorin in the **BC-T-PDI** samples. This impurity partially absorbs the 420 nm excitation light along with the majority absorption by the triad (T) component of the pentad; the putative chlorin is not excited using 745 nm excitation flashes.

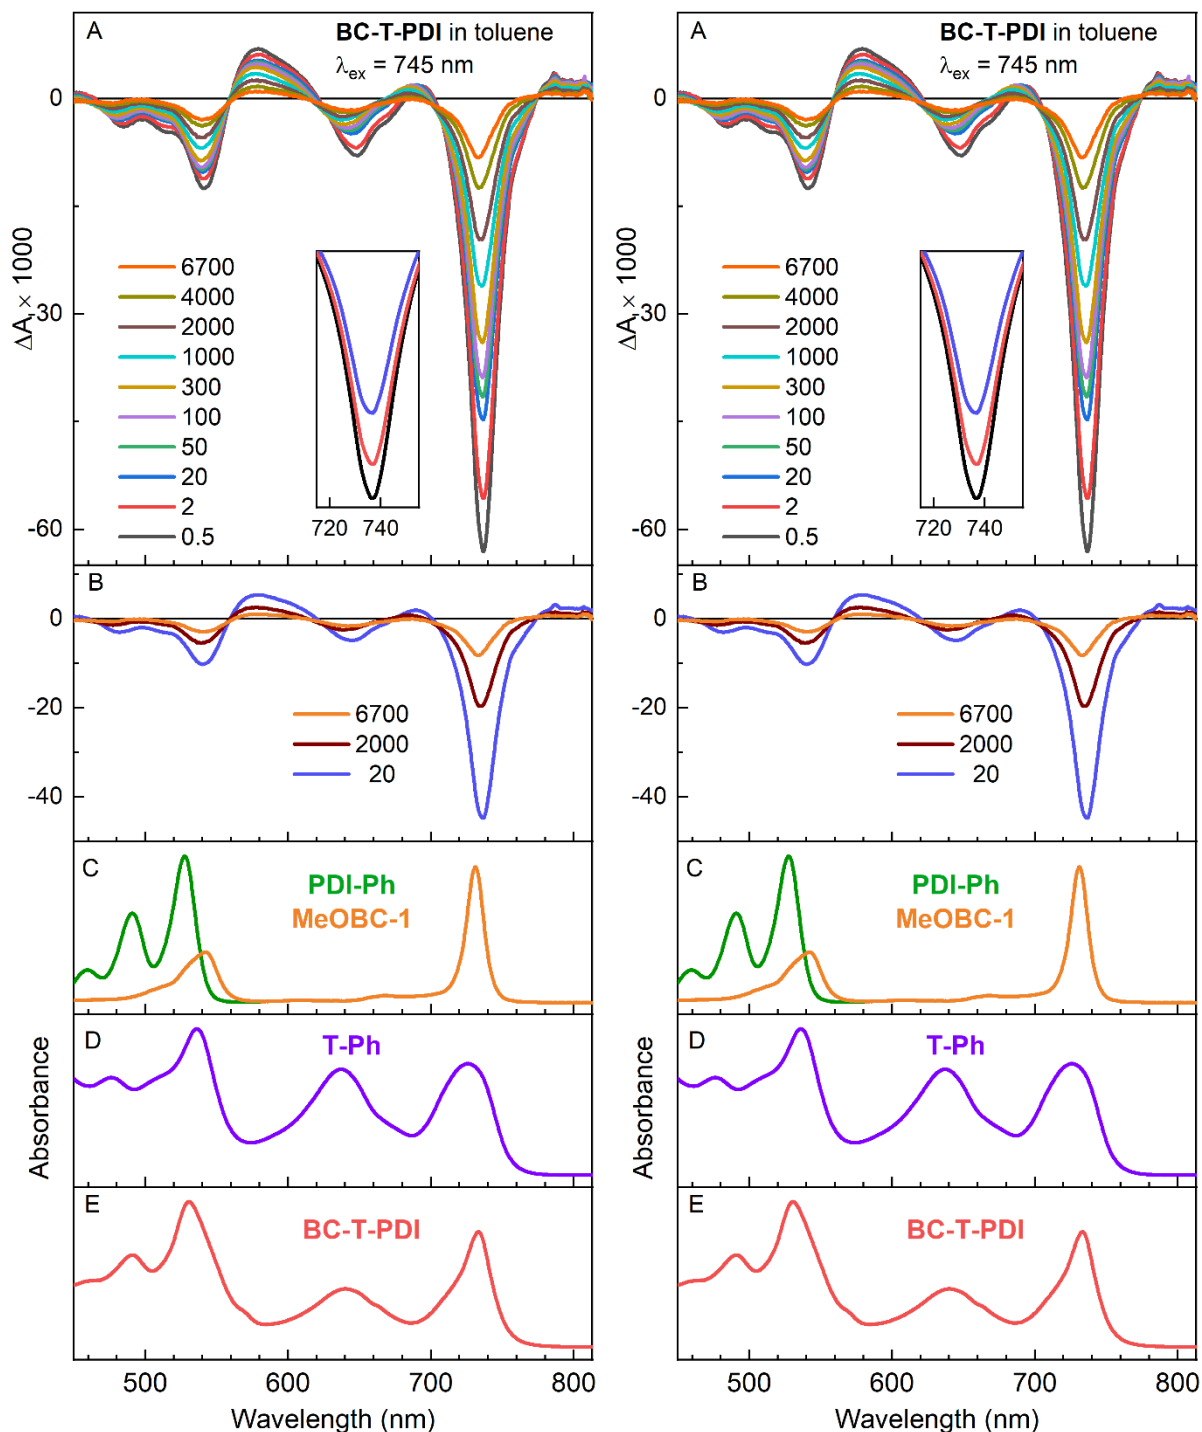

**Figure S6.** Time-resolved and static absorption data for arrays in toluene using  $\lambda_{\text{ex}} = 745$  nm (left panels) and  $\lambda_{\text{ex}} = 430$  nm (right panels). Both columns of panels show TA difference spectra for pentad **BC-T-PDI** in toluene (A, B) and ground-state absorption spectra of monomers **PDI-Ph** and **MeOBC-1** (C), benchmark triad **T-Ph** (D) and the pentad (E). The TA data show small sharp features at  $\sim 570$  and  $\sim 660$  nm due to excitation of a small amount of putative chlorin impurity using  $\lambda_{\text{ex}} = 420$  nm but not  $\lambda_{\text{ex}} = 745$  nm. See the next Figure for kinetic traces.

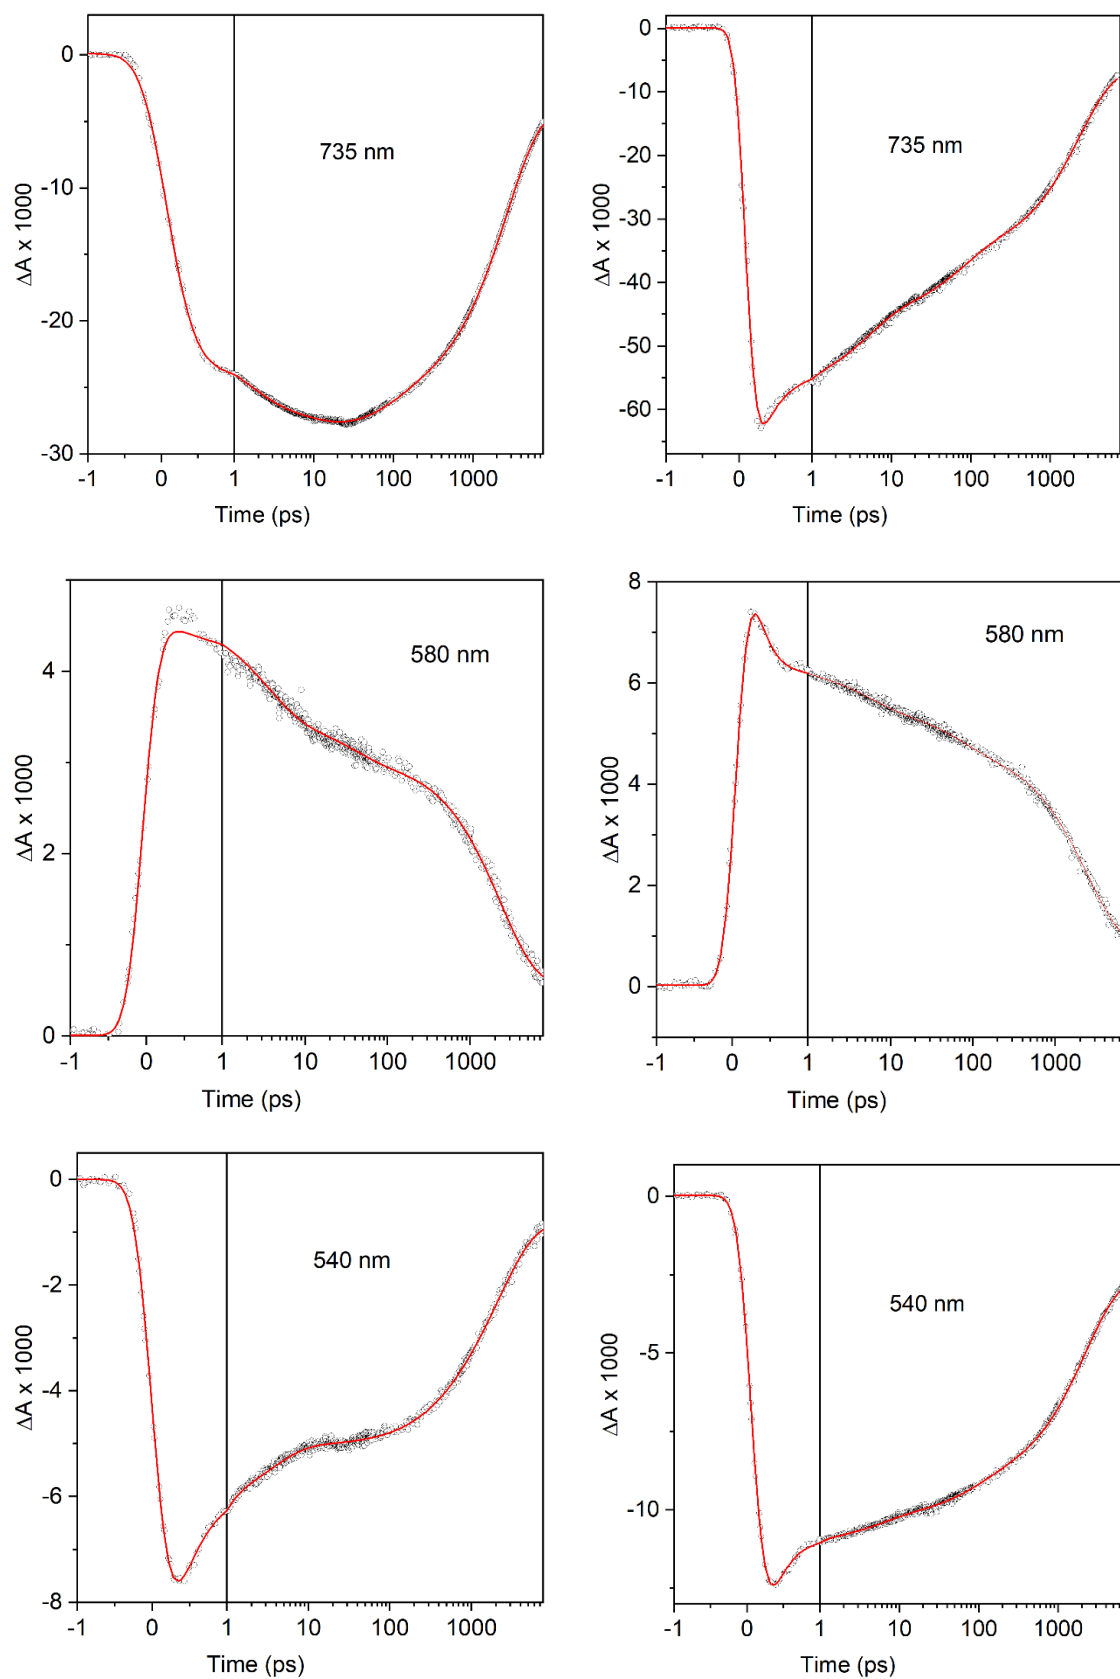

**Figure S7.** TA kinetic profiles and fits for **BC-T-PDI** in toluene at various probe wavelengths using  $\lambda_{ex} = 745$  nm (left panels) and  $\lambda_{ex} = 420$  nm (right panels). See the prior Figure for TA spectra.

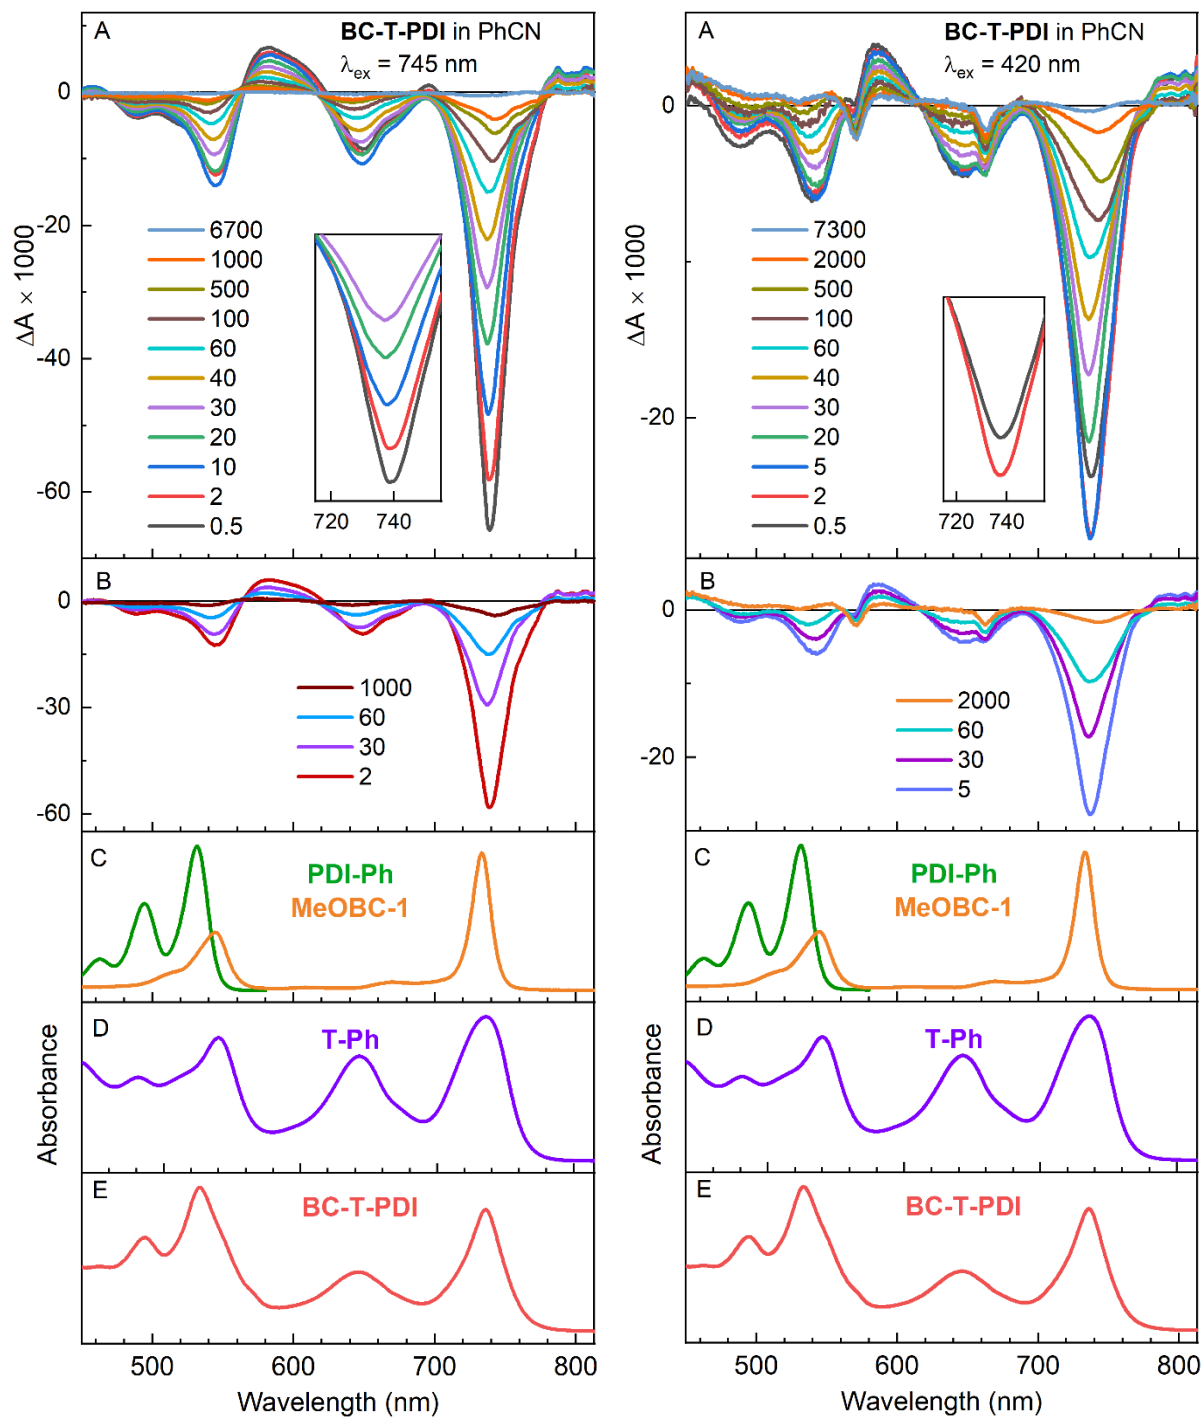

**Figure S8.** Time-resolved and static absorption data for arrays in PhCN using  $\lambda_{\text{ex}} = 745$  nm (left panels) and  $\lambda_{\text{ex}} = 420$  nm (right panels). Both columns of panels show TA difference spectra for pentad **BC-T-PDI** in toluene (A, B) and ground-state absorption spectra of monomers **PDI-Ph** and **MeOBC-1** (C), benchmark triad **T-Ph** (D) and the pentad (E). The TA data show small sharp features at  $\sim 570$  and  $\sim 660$  nm due to excitation of a small amount of putative chlorin impurity using  $\lambda_{\text{ex}} = 420$  nm but not  $\lambda_{\text{ex}} = 745$  nm. See the next Figure for kinetic traces.

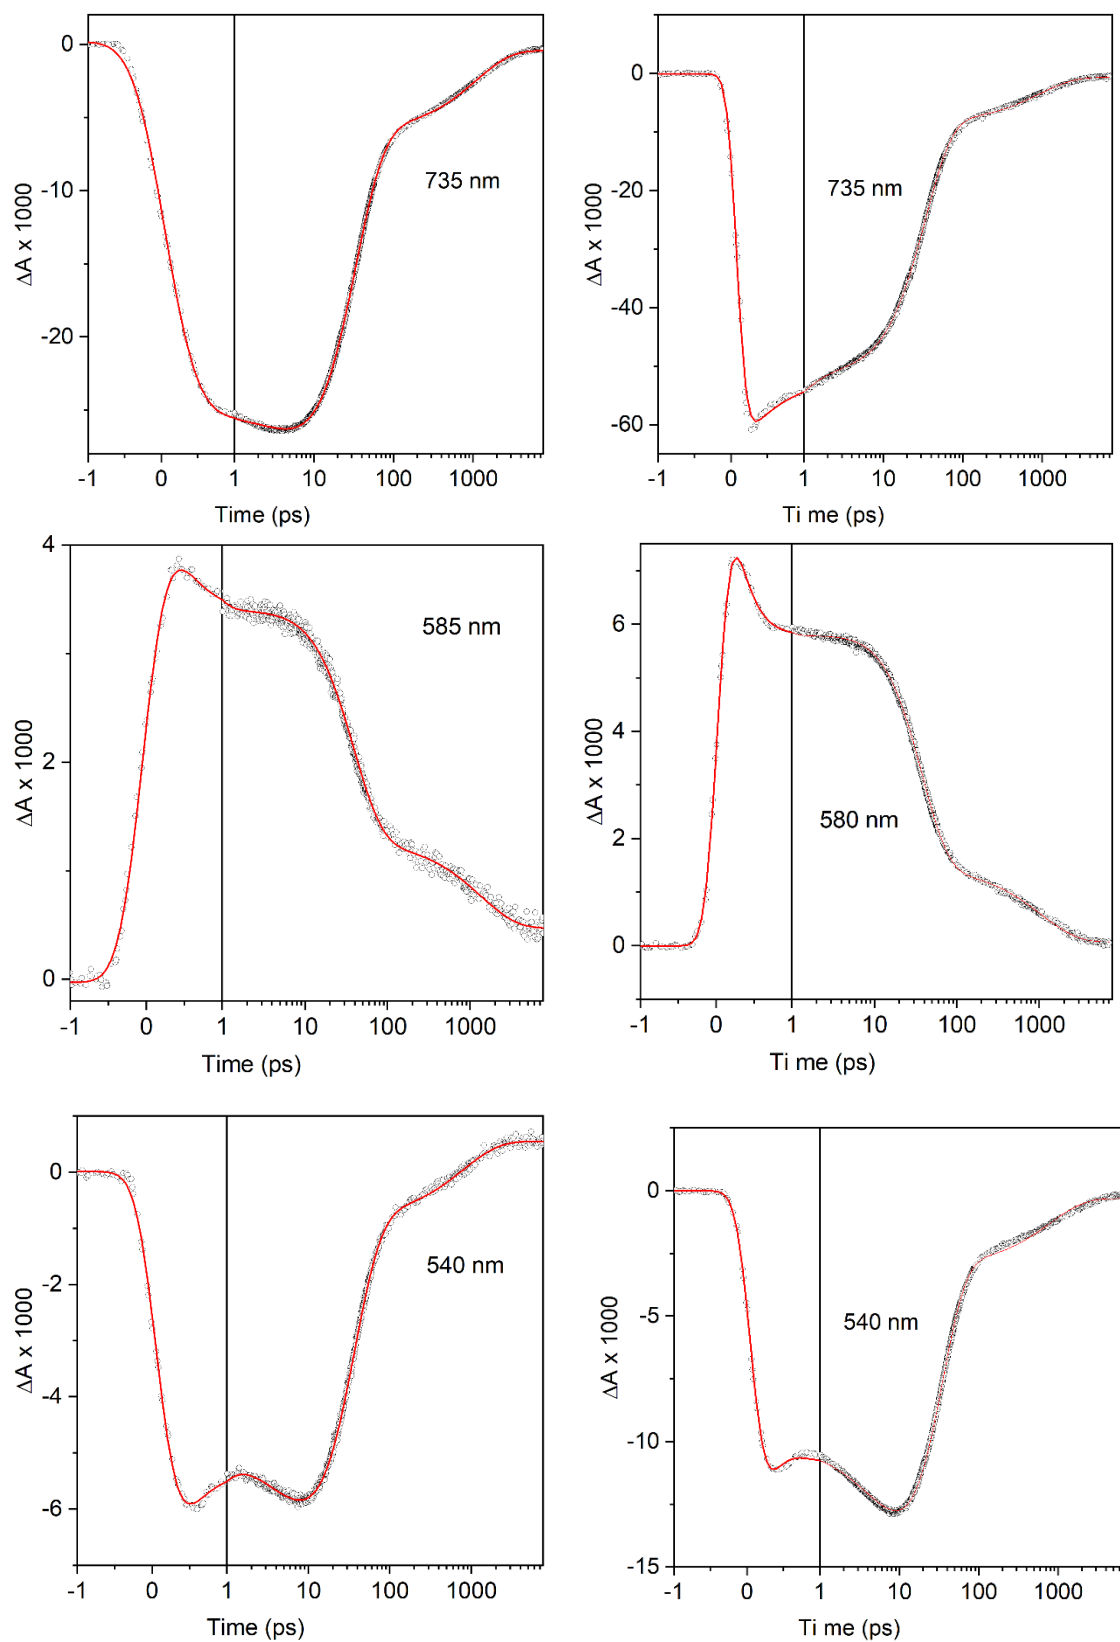

**Figure S9.** TA kinetic profiles and fits for **BC-T-PDI** in PhCN at various probe wavelengths using  $\lambda_{\text{ex}} = 745 \text{ nm}$  (left panels) and  $\lambda_{\text{ex}} = 420 \text{ nm}$  (right panels). See the prior Figure for TA spectra.

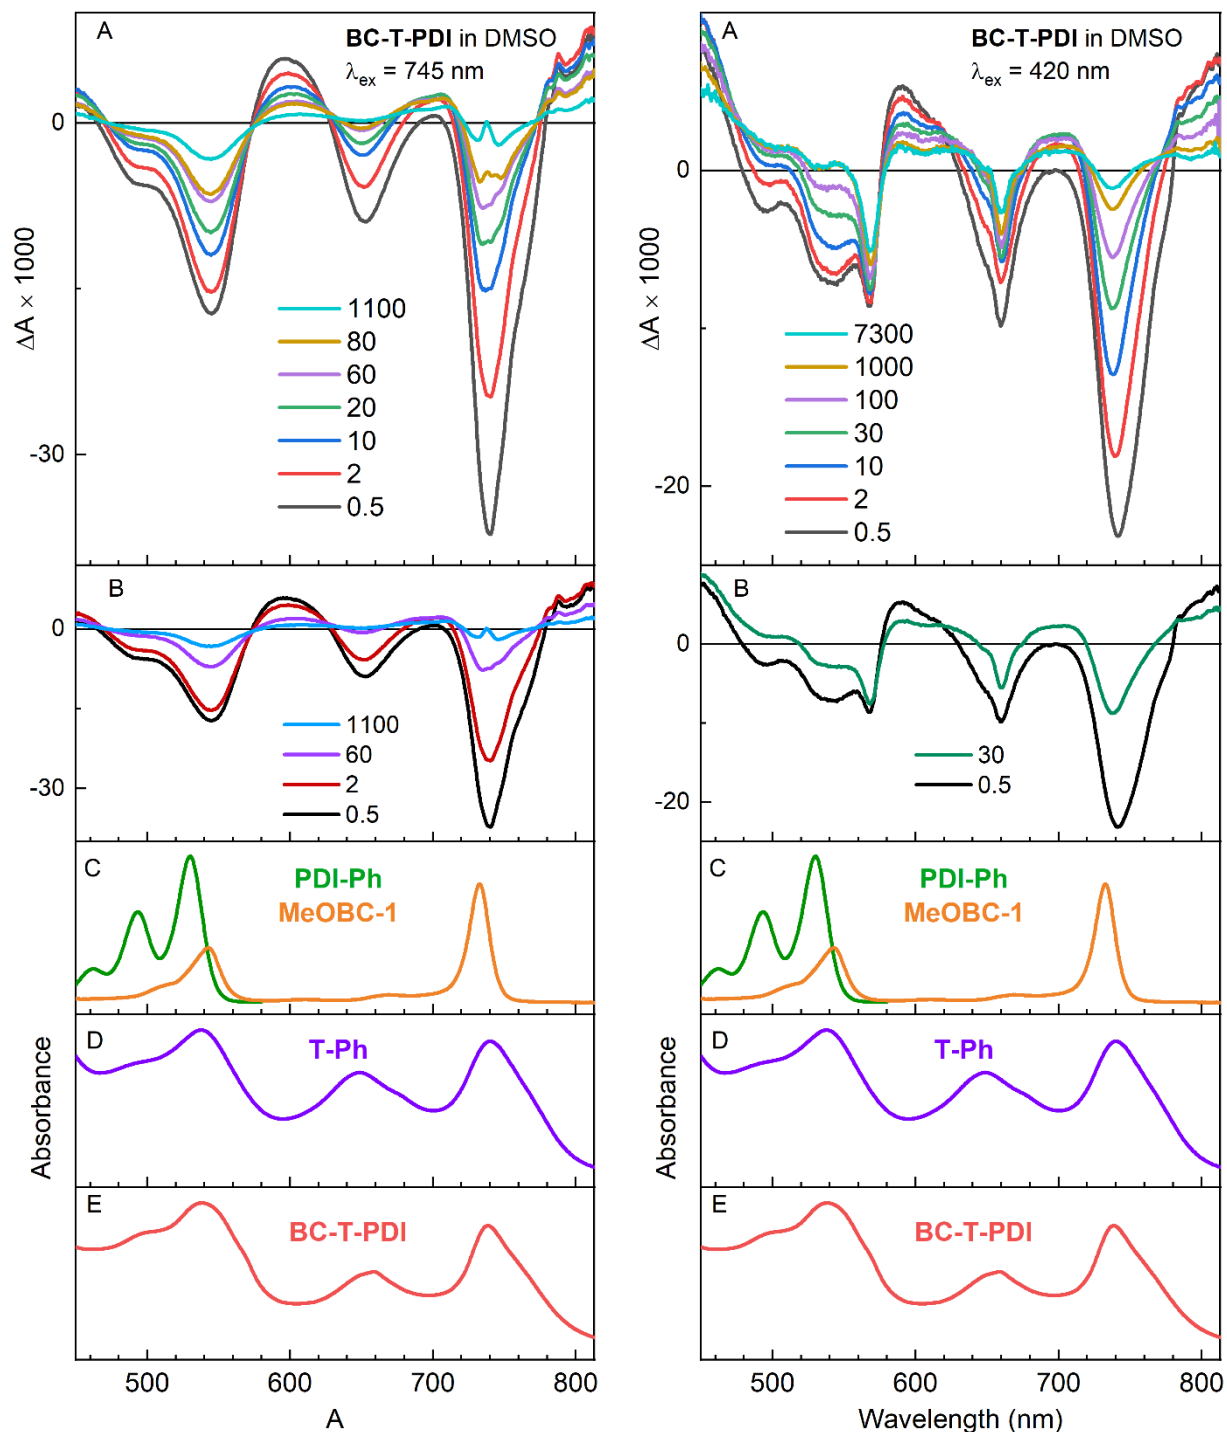

**Figure S10.** Time-resolved and static absorption data for arrays in DMSO using  $\lambda_{\text{ex}} = 745$  nm (left panels) and  $\lambda_{\text{ex}} = 420$  nm (right panels). Both columns of panels show TA difference spectra for pentad **BC-T-PDI** in toluene (A, B) and ground-state absorption spectra of monomers **PDI-Ph** and **MeOBC-1** (C), benchmark triad **T-Ph** (D) and the pentad (E). The TA data show small sharp features at  $\sim 570$  and  $\sim 660$  nm due to excitation of a small amount of putative chlorin impurity using  $\lambda_{\text{ex}} = 420$  nm but not  $\lambda_{\text{ex}} = 745$  nm. See the next Figure for kinetic traces.



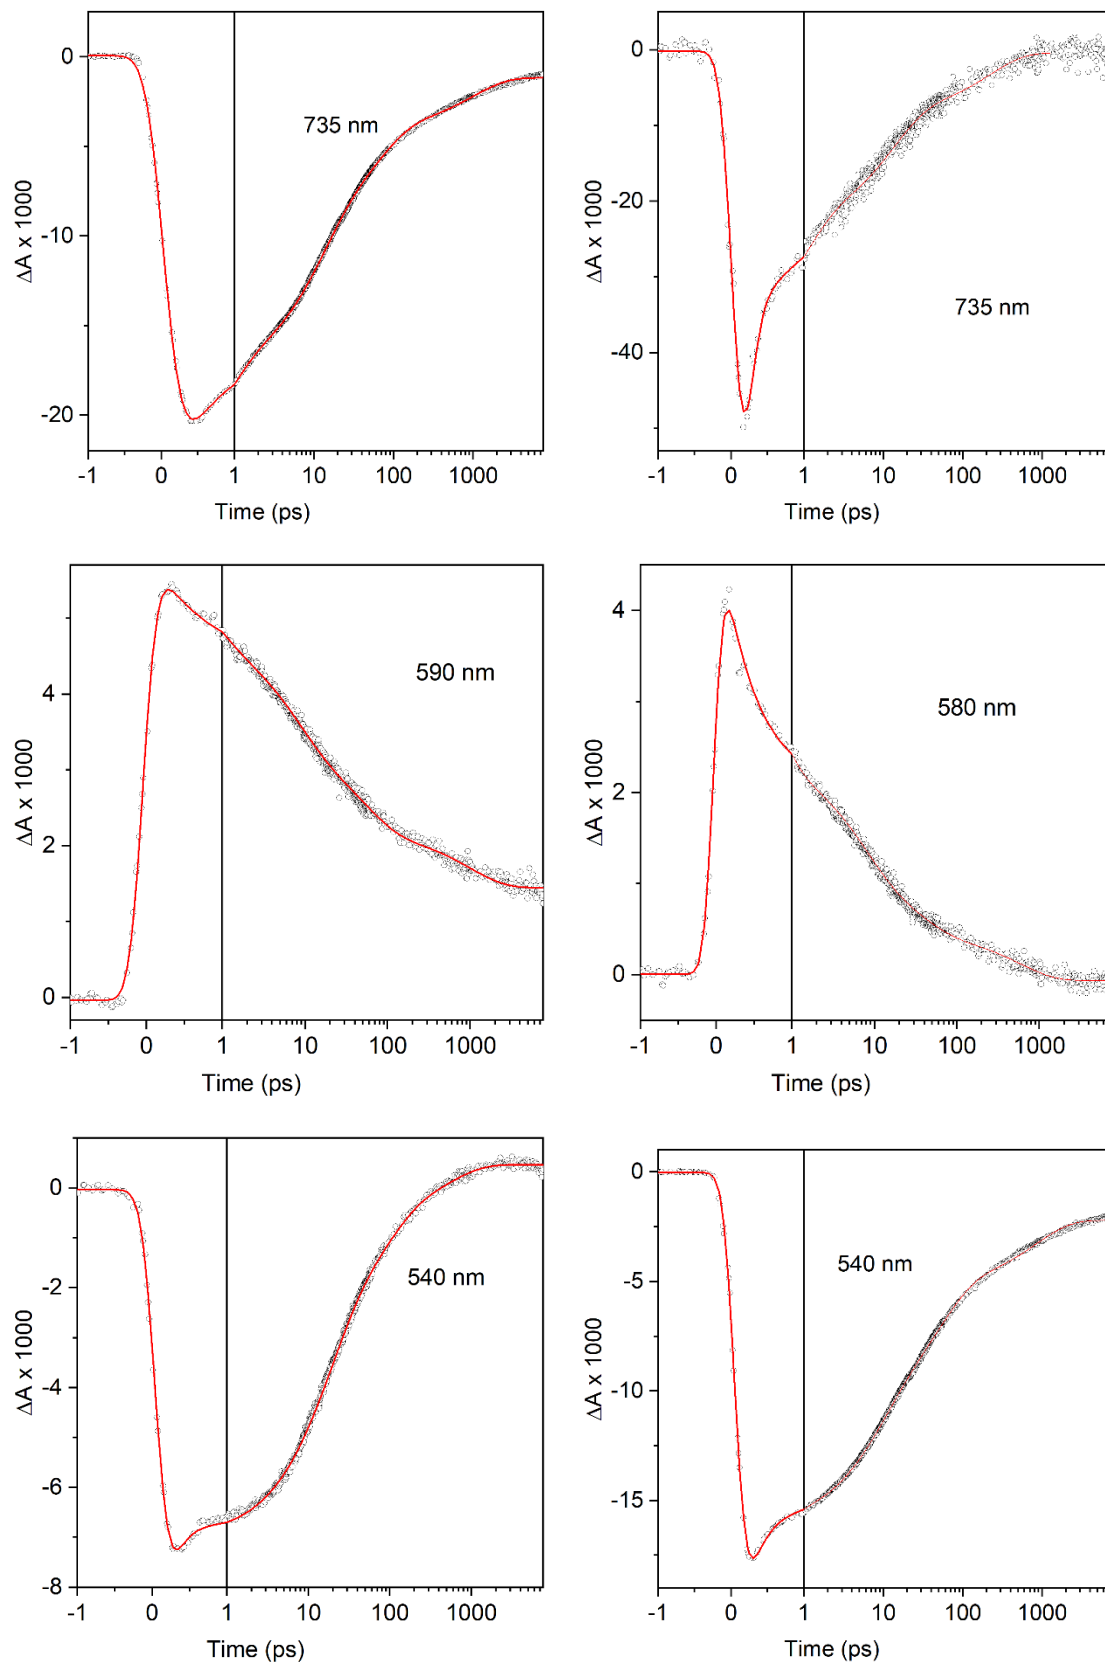

**Figure S11.** TA kinetic profiles and fits for **BC-T-PDI** in DMSO at various probe wavelengths using  $\lambda_{ex} = 745$  nm (left panels) and  $\lambda_{ex} = 420$  nm (right panels). See the prior Figure for TA spectra.

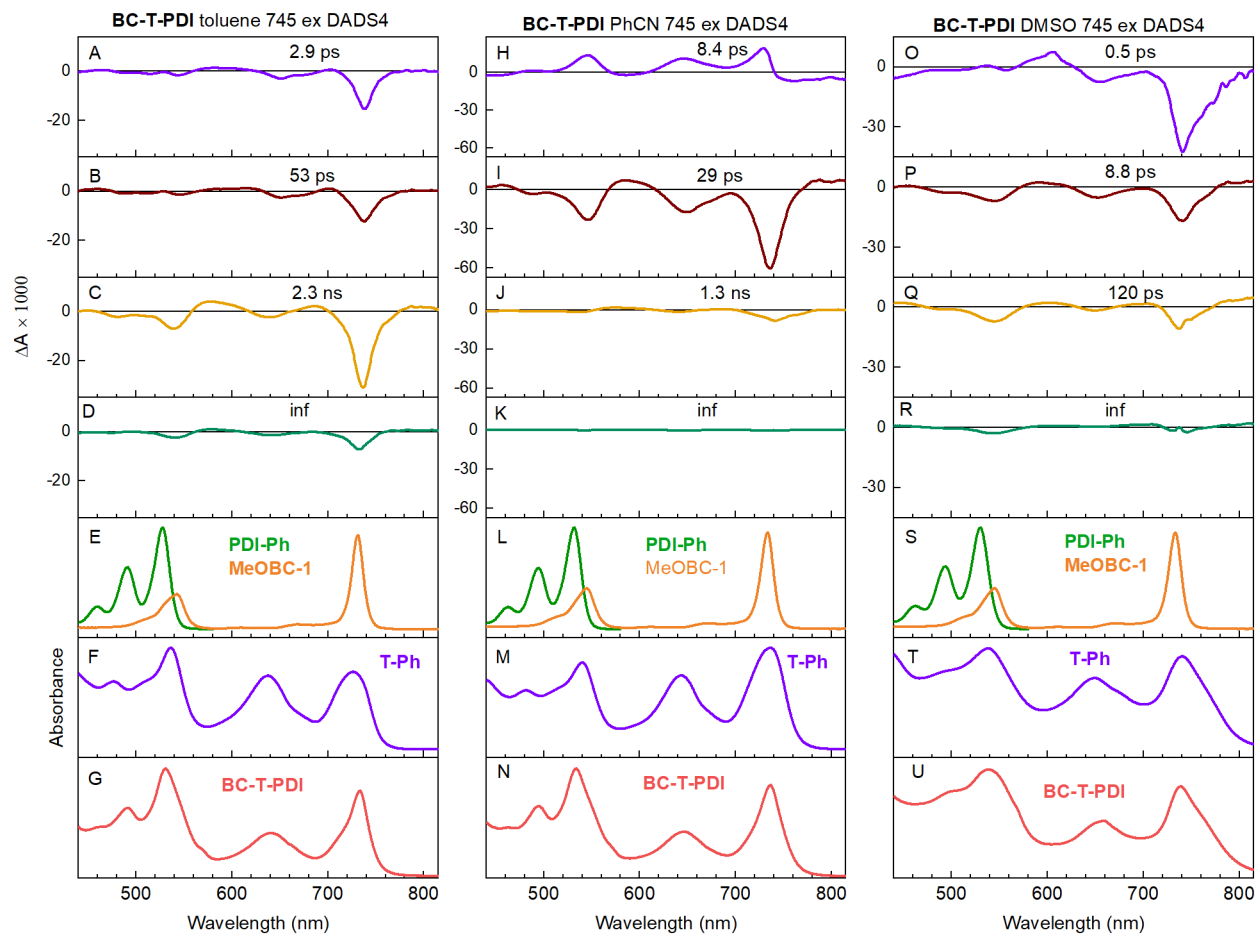

**Figure S12.** DADS summary for **BC-T-PDI** in toluene (left), PhCN (middle) and DMSO (right) obtained using 745 nm excitation flashes.

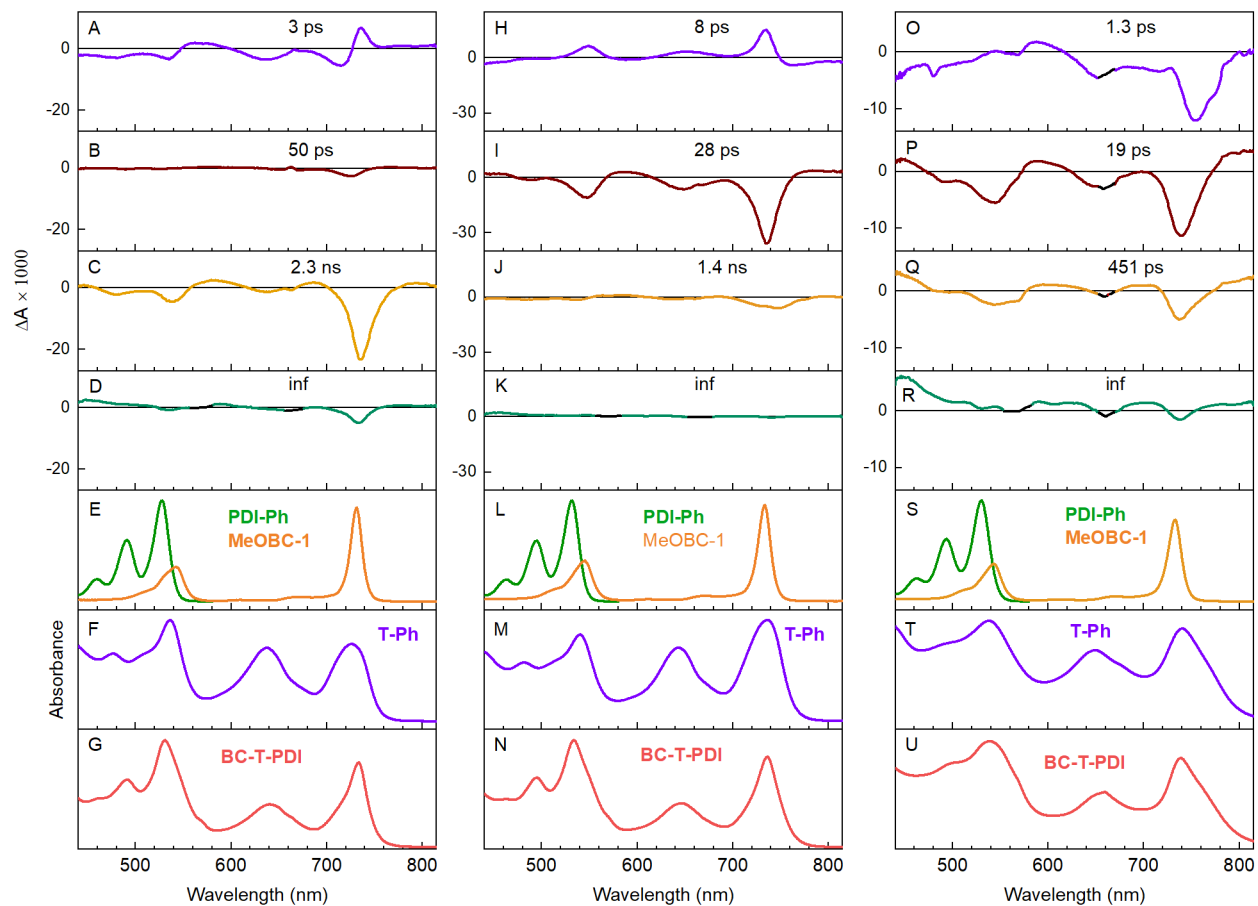

**Figure S13.** DADS summary for **BC-T-PDI** in toluene (left), PhCN (middle) and DMSO (right) using  $\lambda_{\text{ex}} = 420$  nm. Small sharp features at  $\sim 570$  and  $\sim 660$  nm associated with a small putative chlorin impurity excited at 420 nm were removed from the long-lived DADS to avoid confusion and the spectra in those regions are colored black.

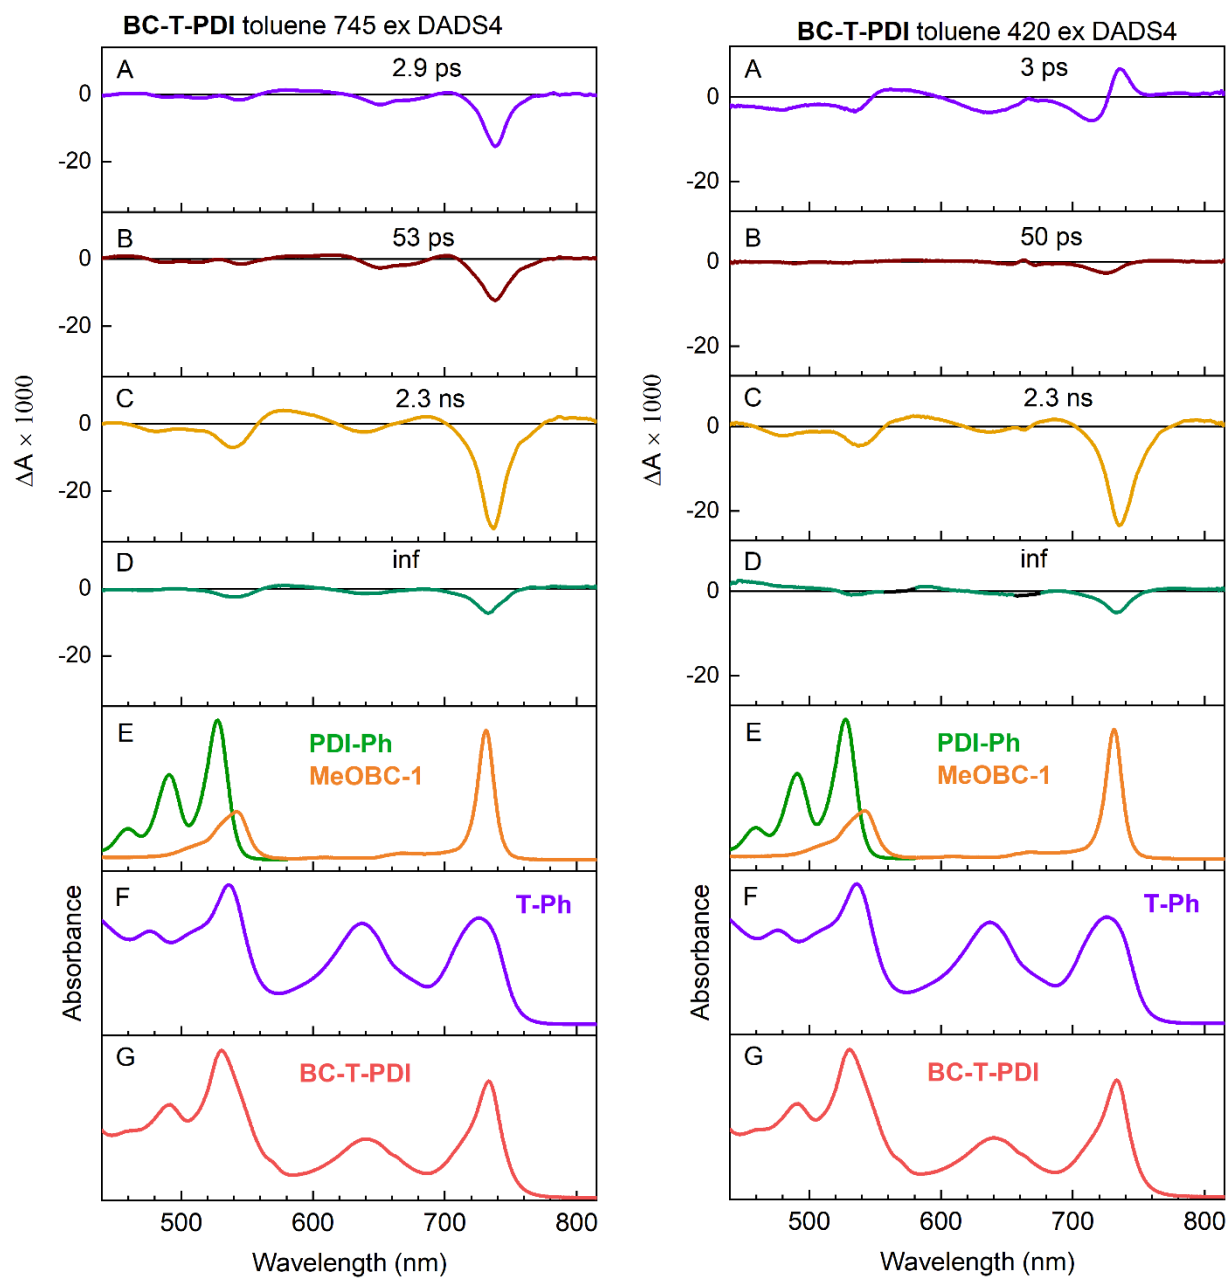

**Figure S14.** DADS for pentad **BC-T-PDI** in toluene using  $\lambda_{\text{ex}} = 745$  nm (left panels) and  $\lambda_{\text{ex}} = 420$  nm (right panels). Small sharp features at  $\sim 570$  and  $\sim 660$  nm associated with a small putative chlorin impurity excited at 420 nm were removed from the long-lived DADS to avoid confusion and the spectra in those regions are colored black.

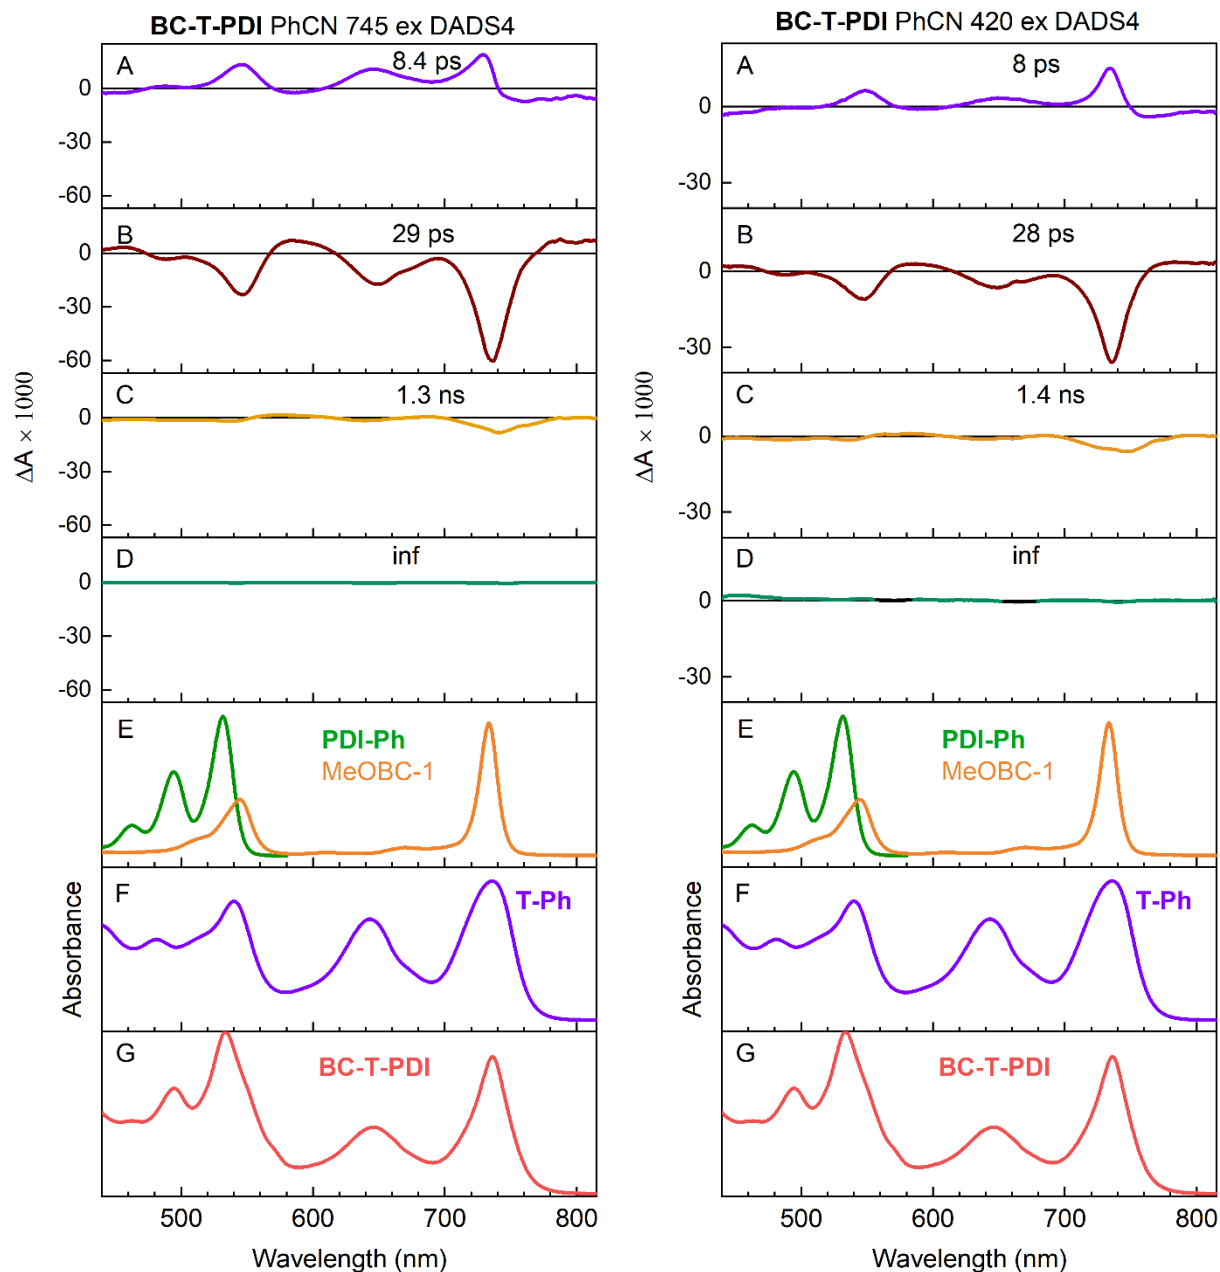

**Figure S15.** DADS for pentad **BC-T-PDI** in PhCN using  $\lambda_{\text{ex}} = 745$  nm (left panels) and  $\lambda_{\text{ex}} = 420$  nm (right panels). Small sharp features at  $\sim 570$  and  $\sim 660$  nm associated with a small putative chlorin impurity excited at 420 nm were removed from the long-lived DADS to avoid confusion and the spectra in those regions are colored black.

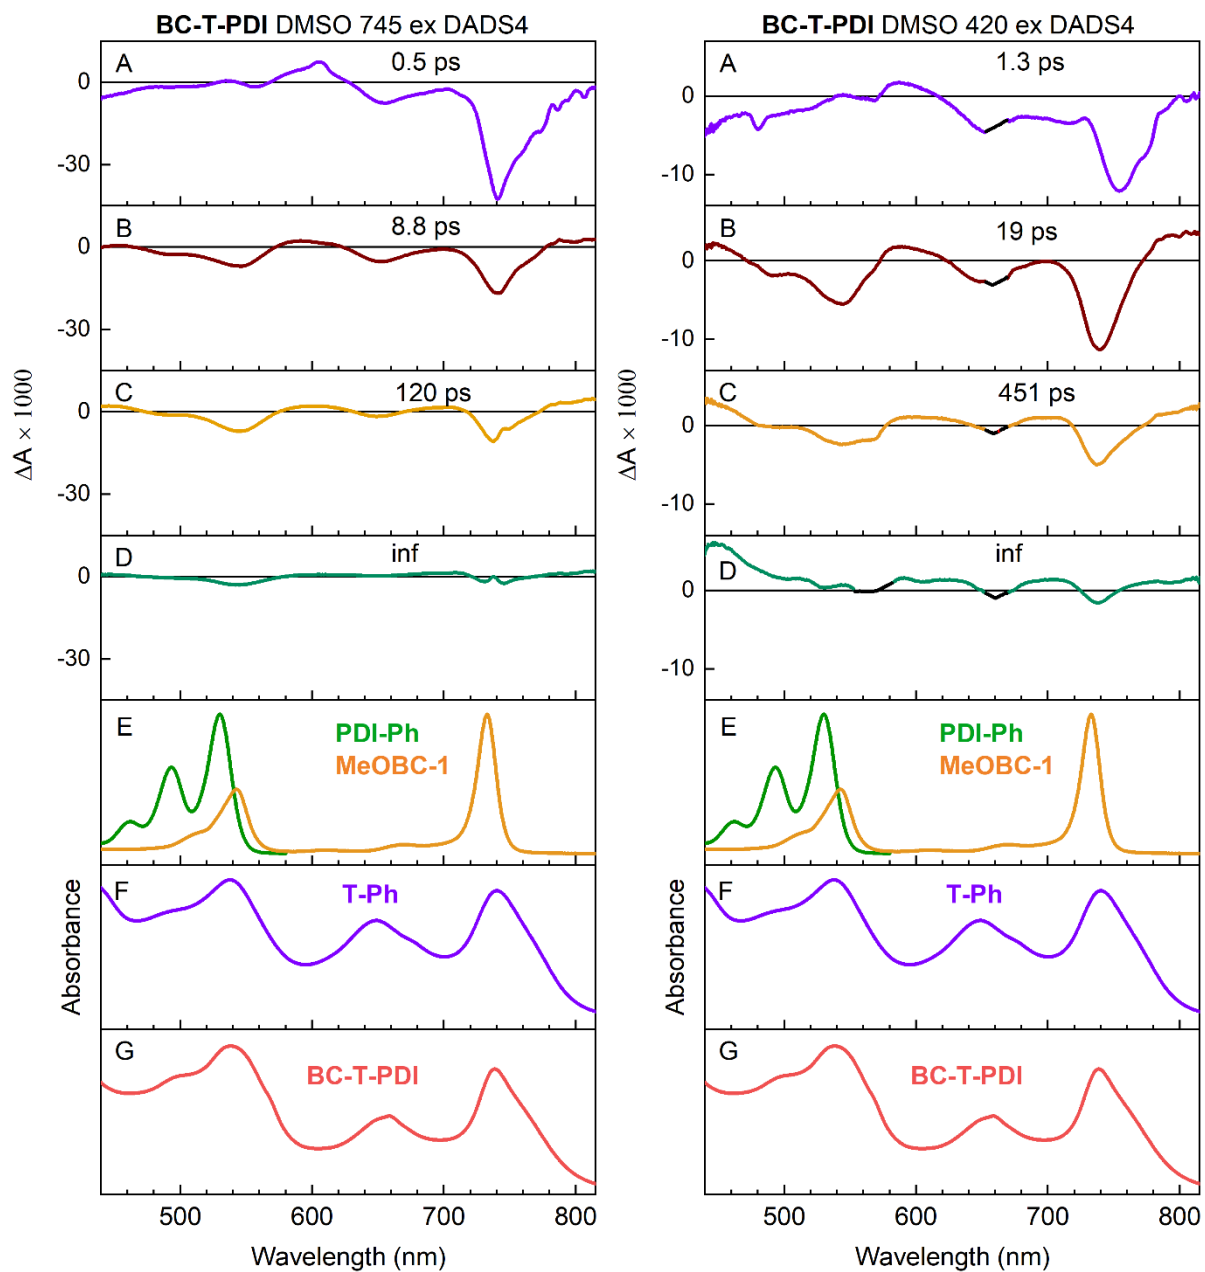

**Figure S16.** DADS for pentad **BC-T-PDI** in DMSO using  $\lambda_{\text{ex}} = 745$  nm (left panels) and  $\lambda_{\text{ex}} = 420$  nm (right panels). Small sharp features at  $\sim 570$  and  $\sim 660$  nm associated with a small putative chlorin impurity excited at 420 nm were removed from the long-lived DADS to avoid confusion and the spectra in those regions are colored black.

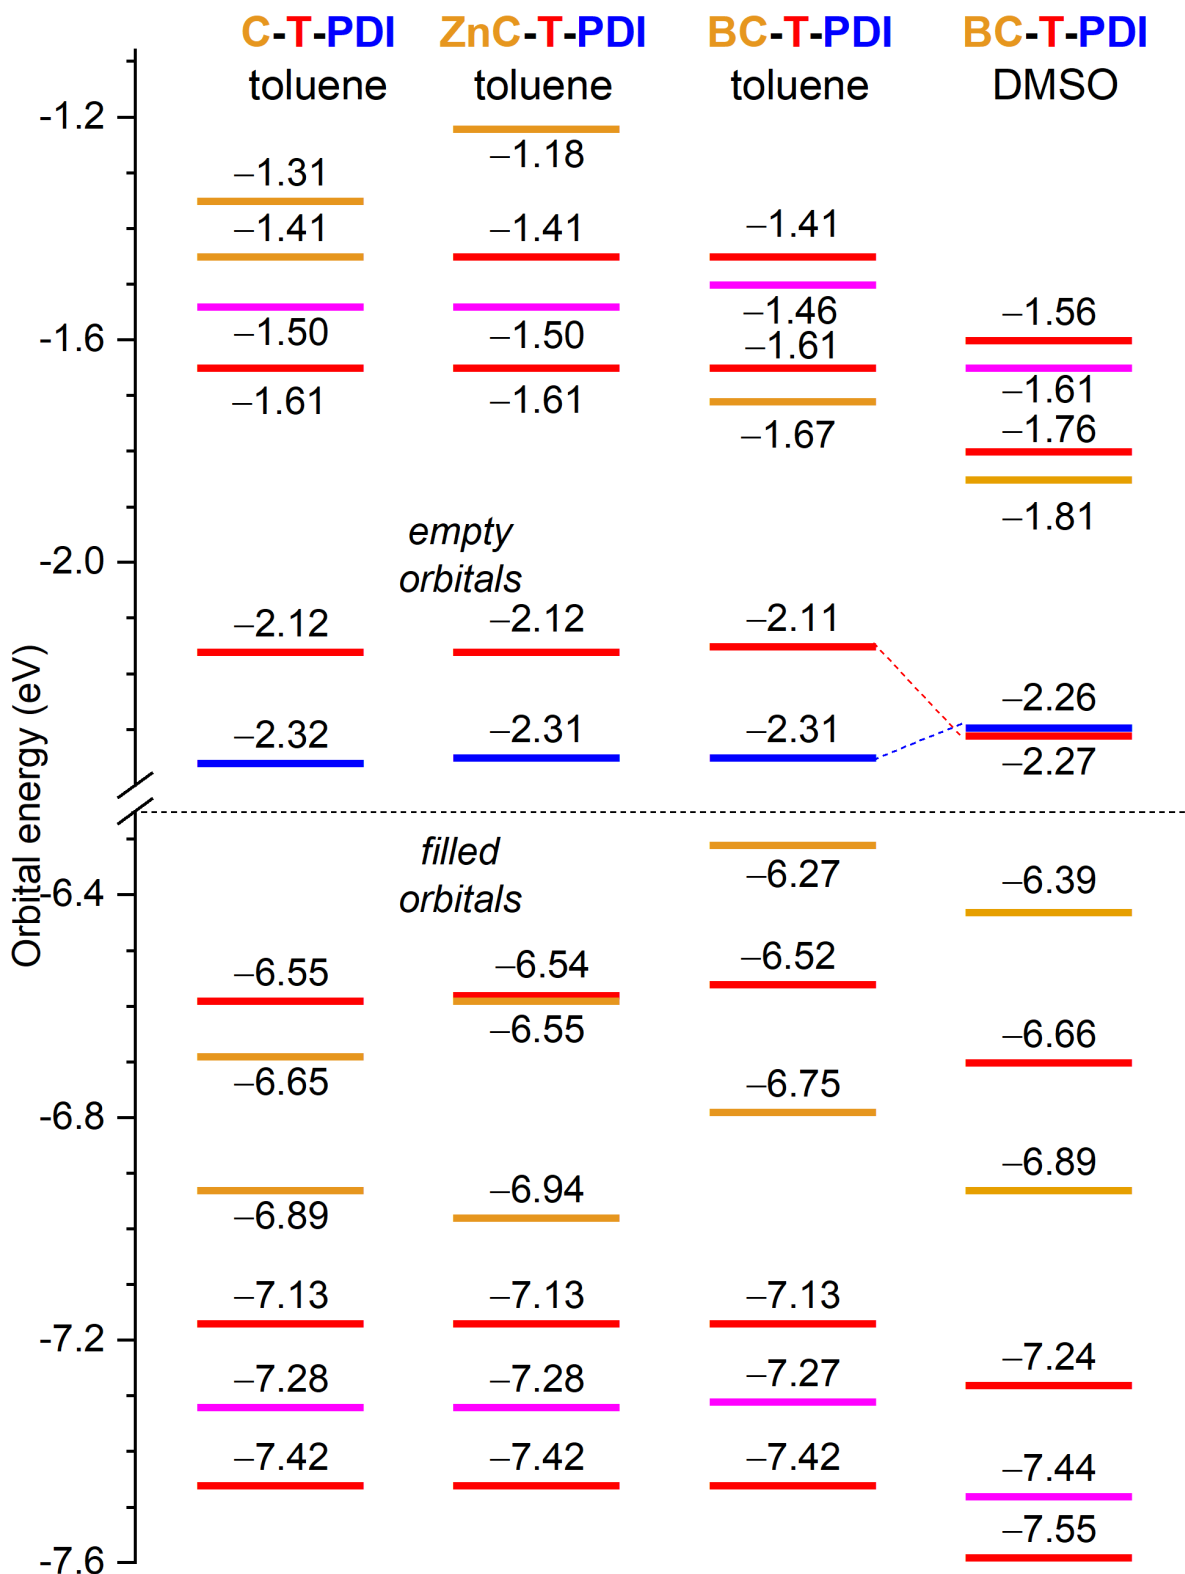

**Figure S17.** MO energies for pentads **ZnC-T-PDI** and **C-T-PDI** studied previously (Chart 1)<sup>60</sup> and pentad **BC-T-PDI** studied here (Chart 2), in the solvents indicated. The lines at the MO energies are colored to match the constituent: (bacterio)chlorin (gold), perylene-diimide (blue), and central panchromatic triad [red (derived from the porphyrin HOMO or LUMO and magenta (derived from the porphyrin HOMO-1 or LUMO+1)].

**Table S1.** MOs for pentad **BC-T-PDI** in toluene.

| MO      | Energy (eV) | MO Image                                                                             |
|---------|-------------|--------------------------------------------------------------------------------------|
| HOMO-11 | -8.47       | 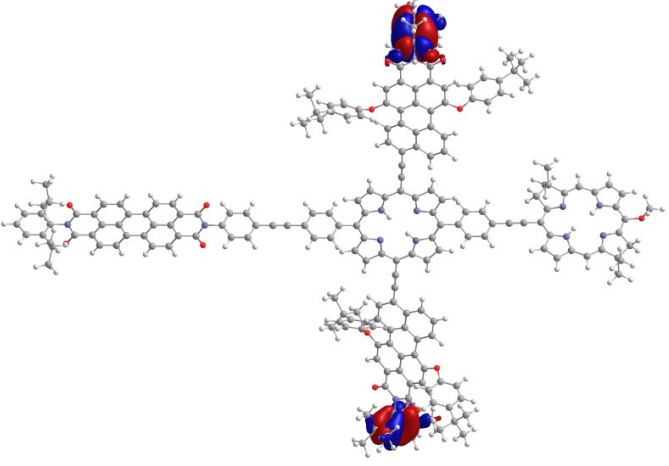   |
| HOMO-10 | -8.32       |   |
| HOMO-9  | -8.21       |  |



|        |       |                                                                                      |
|--------|-------|--------------------------------------------------------------------------------------|
| HOMO-8 | -8.21 | 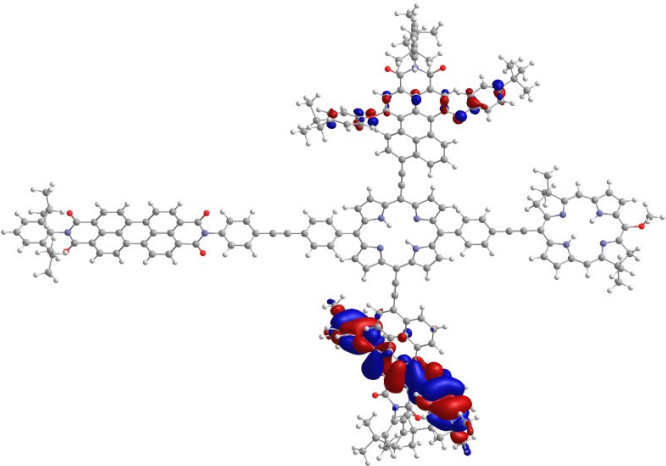   |
| HOMO-7 | -8.03 |   |
| HOMO-6 | -7.88 |  |

|        |       |                                                                                      |
|--------|-------|--------------------------------------------------------------------------------------|
| HOMO-5 | -7.42 | 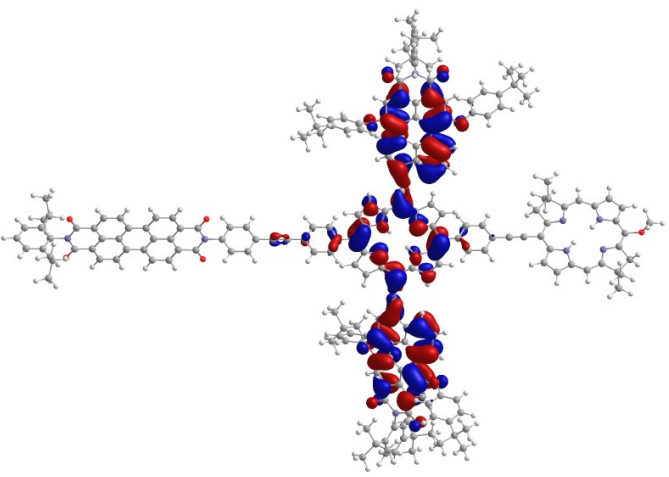   |
| HOMO-4 | -7.27 |   |
| HOMO-3 | -7.13 |  |

|        |       |                                                                                      |
|--------|-------|--------------------------------------------------------------------------------------|
| HOMO-2 | -6.75 | 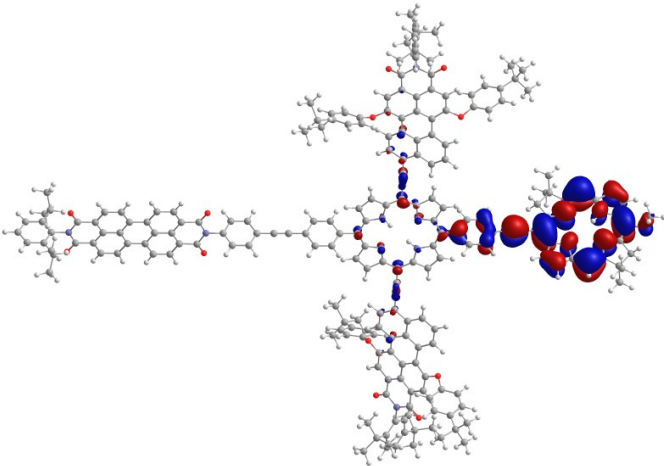   |
| HOMO-1 | -6.52 |   |
| HOMO   | -6.27 |  |

|        |       |                                                                                      |
|--------|-------|--------------------------------------------------------------------------------------|
| LUMO   | -2.31 | 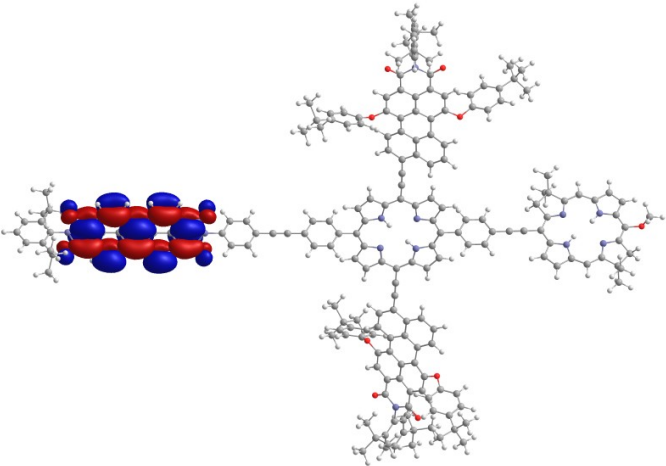   |
| LUMO+1 | -2.11 |   |
| LUMO+2 | -1.67 |  |

|        |       |                                                                                                                                                                                                                                                                                                    |
|--------|-------|----------------------------------------------------------------------------------------------------------------------------------------------------------------------------------------------------------------------------------------------------------------------------------------------------|
| LUMO+3 | -1.61 | 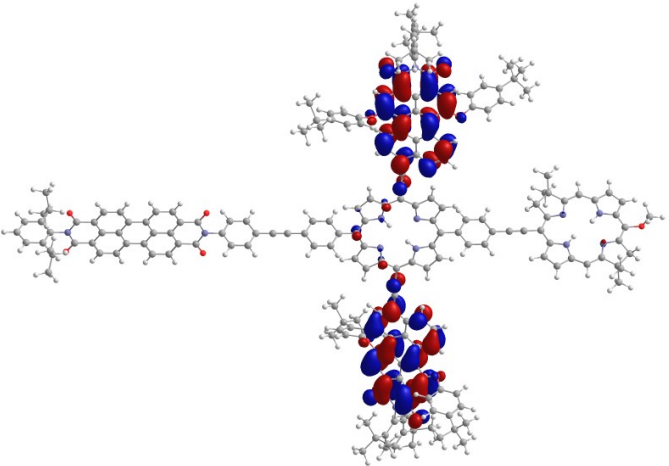 Molecular orbital visualization for LUMO+3. The structure shows a central core with four peripheral arms. The orbital is localized on the top and bottom arms, with positive (red) and negative (blue) lobes.   |
| LUMO+4 | -1.46 |  Molecular orbital visualization for LUMO+4. The structure shows a central core with four peripheral arms. The orbital is localized on the left and right arms, with positive (red) and negative (blue) lobes.  |
| LUMO+5 | -1.41 |  Molecular orbital visualization for LUMO+5. The structure shows a central core with four peripheral arms. The orbital is localized on the top and bottom arms, with positive (red) and negative (blue) lobes. |

|        |       |                                                                                      |
|--------|-------|--------------------------------------------------------------------------------------|
| LUMO+6 | -0.45 | 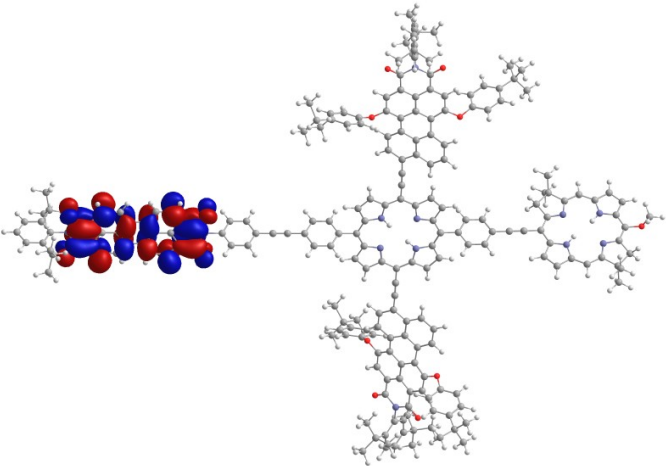   |
| LUMO+7 | -0.26 |   |
| LUMO+8 | -0.16 |  |

|         |       |                                                                                      |
|---------|-------|--------------------------------------------------------------------------------------|
| LUMO+9  | -0.16 | 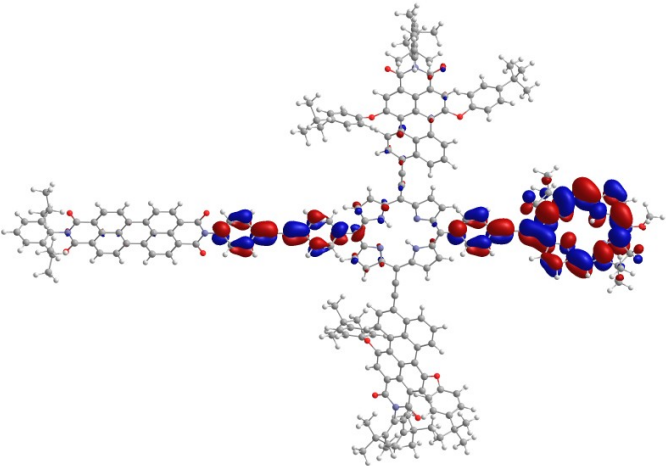   |
| LUMO+10 | 0.00  |   |
| LUMO+11 | +0.18 |  |

**Table S2.** MOs for pentad **BC-T-PDI** in DMSO.

| MO      | Energy (eV) | MO Image                                                                             |
|---------|-------------|--------------------------------------------------------------------------------------|
| HOMO-11 | -8.61       | 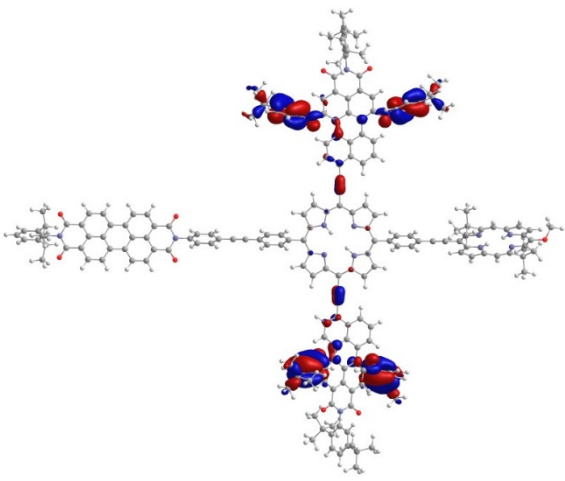   |
| HOMO-10 | -8.44       |   |
| HOMO-9  | -8.30       |  |



|        |       |                                                                                      |
|--------|-------|--------------------------------------------------------------------------------------|
| HOMO-8 | -8.30 | 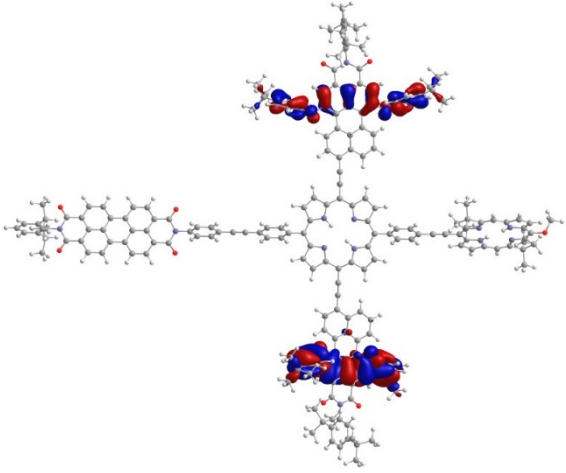   |
| HOMO-7 | -8.16 |   |
| HOMO-6 | -7.79 |  |

|        |       |                                                                                                                                                                                                                                                                                                                                                                                                                          |
|--------|-------|--------------------------------------------------------------------------------------------------------------------------------------------------------------------------------------------------------------------------------------------------------------------------------------------------------------------------------------------------------------------------------------------------------------------------|
| HOMO-5 | -7.55 | 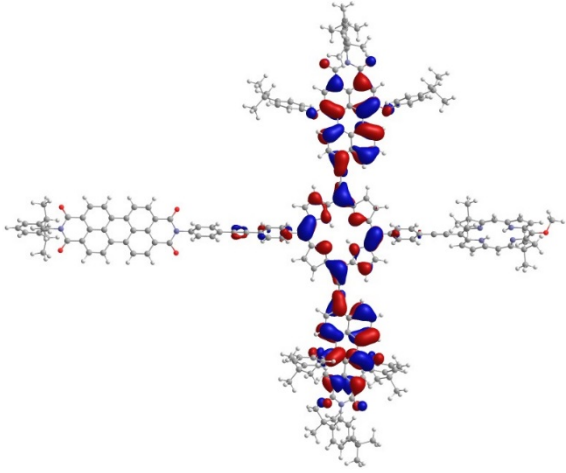 Molecular orbital visualization for HOMO-5. The structure shows a central core with four arms extending outwards. The orbital is represented by red and blue lobes, indicating positive and negative phases. The lobes are distributed across the entire molecule, with significant density in the central region and along the arms. |
| HOMO-4 | -7.44 |  Molecular orbital visualization for HOMO-4. The structure shows a central core with four arms extending outwards. The orbital is represented by red and blue lobes. The central region shows a complex arrangement of lobes, with some density extending into the arms.                                                              |
| HOMO-3 | -7.24 |  Molecular orbital visualization for HOMO-3. The structure shows a central core with four arms extending outwards. The orbital is represented by red and blue lobes. The central region shows a complex arrangement of lobes, with some density extending into the arms.                                                             |

|        |       |                                                                                                                                                                                                                                                                                                                     |
|--------|-------|---------------------------------------------------------------------------------------------------------------------------------------------------------------------------------------------------------------------------------------------------------------------------------------------------------------------|
| HOMO-2 | -6.89 | 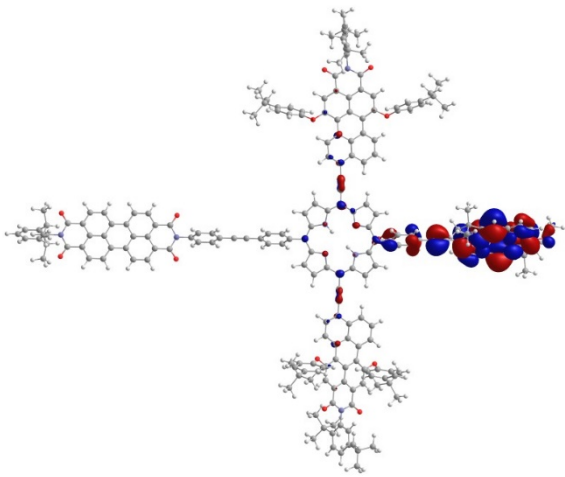 Molecular orbital visualization for HOMO-2. The structure shows a central core with four arms. The orbital is localized primarily on the right arm, with a large positive lobe (red) and a smaller negative lobe (blue).         |
| HOMO-1 | -6.66 |  Molecular orbital visualization for HOMO-1. The structure shows a central core with four arms. The orbital is delocalized across the central core and all four arms, with alternating positive (red) and negative (blue) lobes. |
| HOMO   | -6.39 |  Molecular orbital visualization for HOMO. The structure shows a central core with four arms. The orbital is localized primarily on the right arm, with a large positive lobe (red) and a smaller negative lobe (blue).         |

|        |       |                                                                                                                                                                                                                                                                                                                                                                        |
|--------|-------|------------------------------------------------------------------------------------------------------------------------------------------------------------------------------------------------------------------------------------------------------------------------------------------------------------------------------------------------------------------------|
| LUMO   | -2.27 | 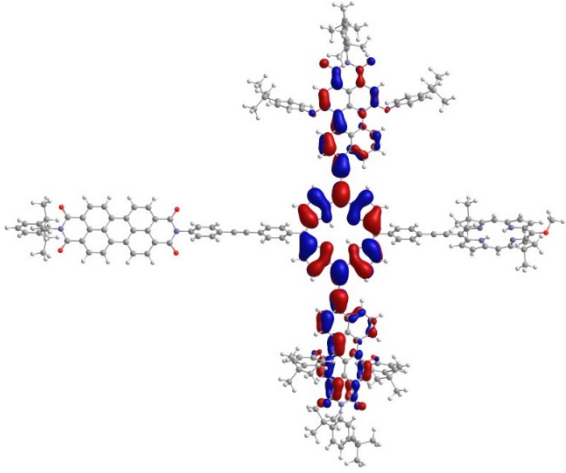 <p>3D visualization of the LUMO orbital. The molecule is shown in a stick representation with red and blue isosurfaces representing the orbital lobes. The orbital is primarily localized on the central part of the molecule, with smaller lobes extending to the side groups.</p> |
| LUMO+1 | -2.26 |  <p>3D visualization of the LUMO+1 orbital. The molecule is shown in a stick representation with red and blue isosurfaces. The orbital is primarily localized on the left side group, with smaller lobes extending to the central part of the molecule.</p>                         |
| LUMO+2 | -1.81 |  <p>3D visualization of the LUMO+2 orbital. The molecule is shown in a stick representation with red and blue isosurfaces. The orbital is primarily localized on the right side group, with smaller lobes extending to the central part of the molecule.</p>                       |

|        |       |                                                                                                                                                                                                                                                                                                                                                                 |
|--------|-------|-----------------------------------------------------------------------------------------------------------------------------------------------------------------------------------------------------------------------------------------------------------------------------------------------------------------------------------------------------------------|
| LUMO+3 | -1.76 | 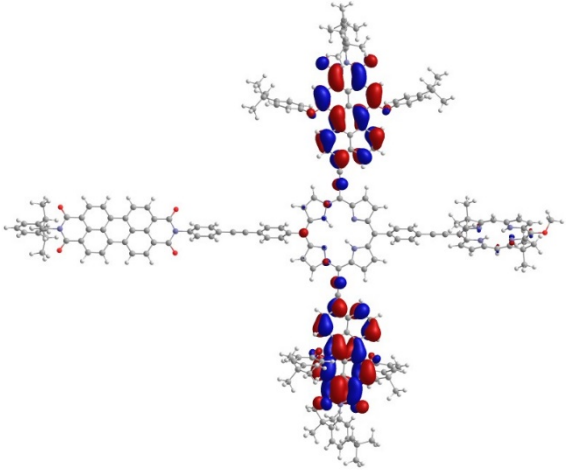 <p>3D visualization of the LUMO+3 molecular orbital. The molecule is shown in a ball-and-stick model with red and blue isosurfaces representing the orbital's phase distribution. The orbital is primarily localized on the central and right-hand side of the molecule.</p> |
| LUMO+4 | -1.61 |  <p>3D visualization of the LUMO+4 molecular orbital. The molecule is shown in a ball-and-stick model with red and blue isosurfaces. The orbital is primarily localized on the left-hand side of the molecule.</p>                                                           |
| LUMO+5 | -1.56 |  <p>3D visualization of the LUMO+5 molecular orbital. The molecule is shown in a ball-and-stick model with red and blue isosurfaces. The orbital is primarily localized on the central and right-hand side of the molecule.</p>                                             |

|        |       |                                                                                      |
|--------|-------|--------------------------------------------------------------------------------------|
| LUMO+6 | -0.42 | 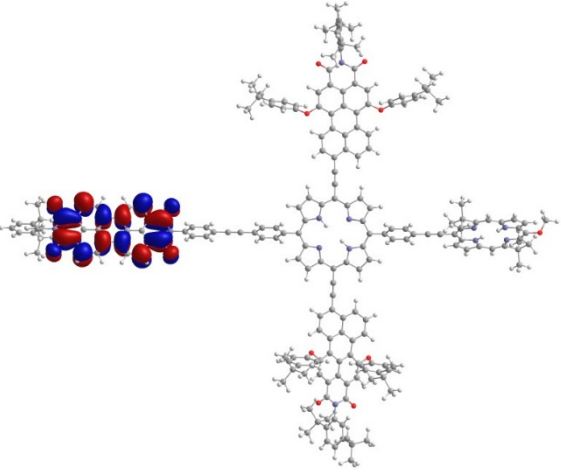   |
| LUMO+7 | -0.32 |   |
| LUMO+8 | -0.19 |  |

|         |       |                                                                                      |
|---------|-------|--------------------------------------------------------------------------------------|
| LUMO+9  | -0.15 | 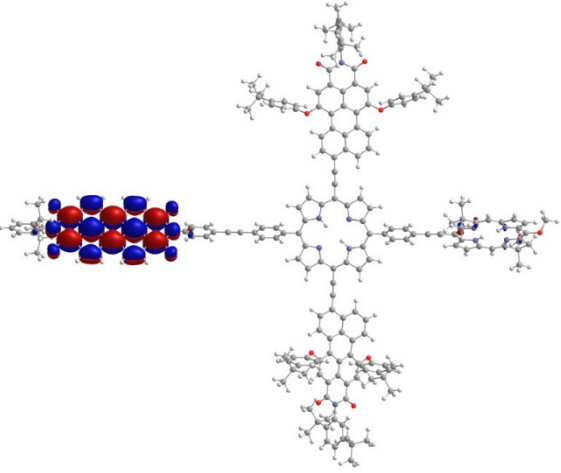   |
| LUMO+10 | -0.13 |   |
| LUMO+11 | +0.09 |  |

**Table S3.** MOs for bacteriochlorin monomer **MeO-BC-1** in toluene.

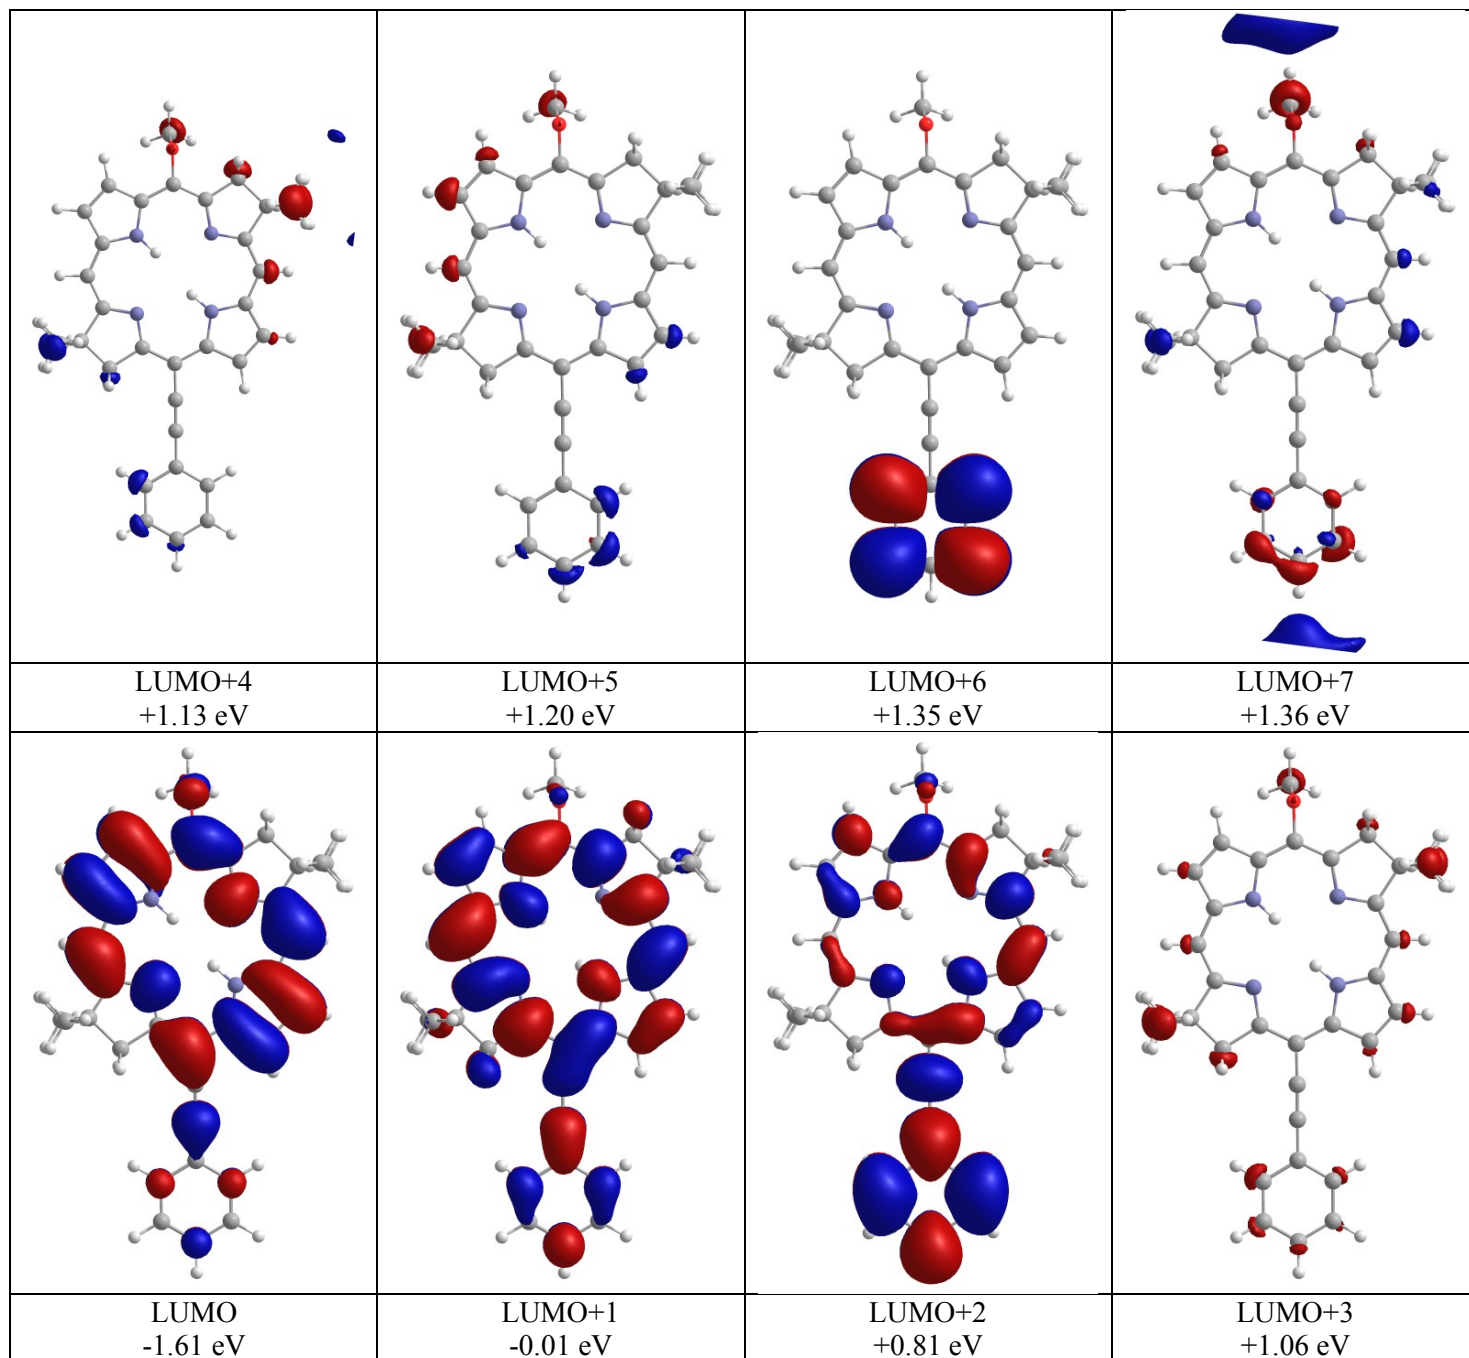



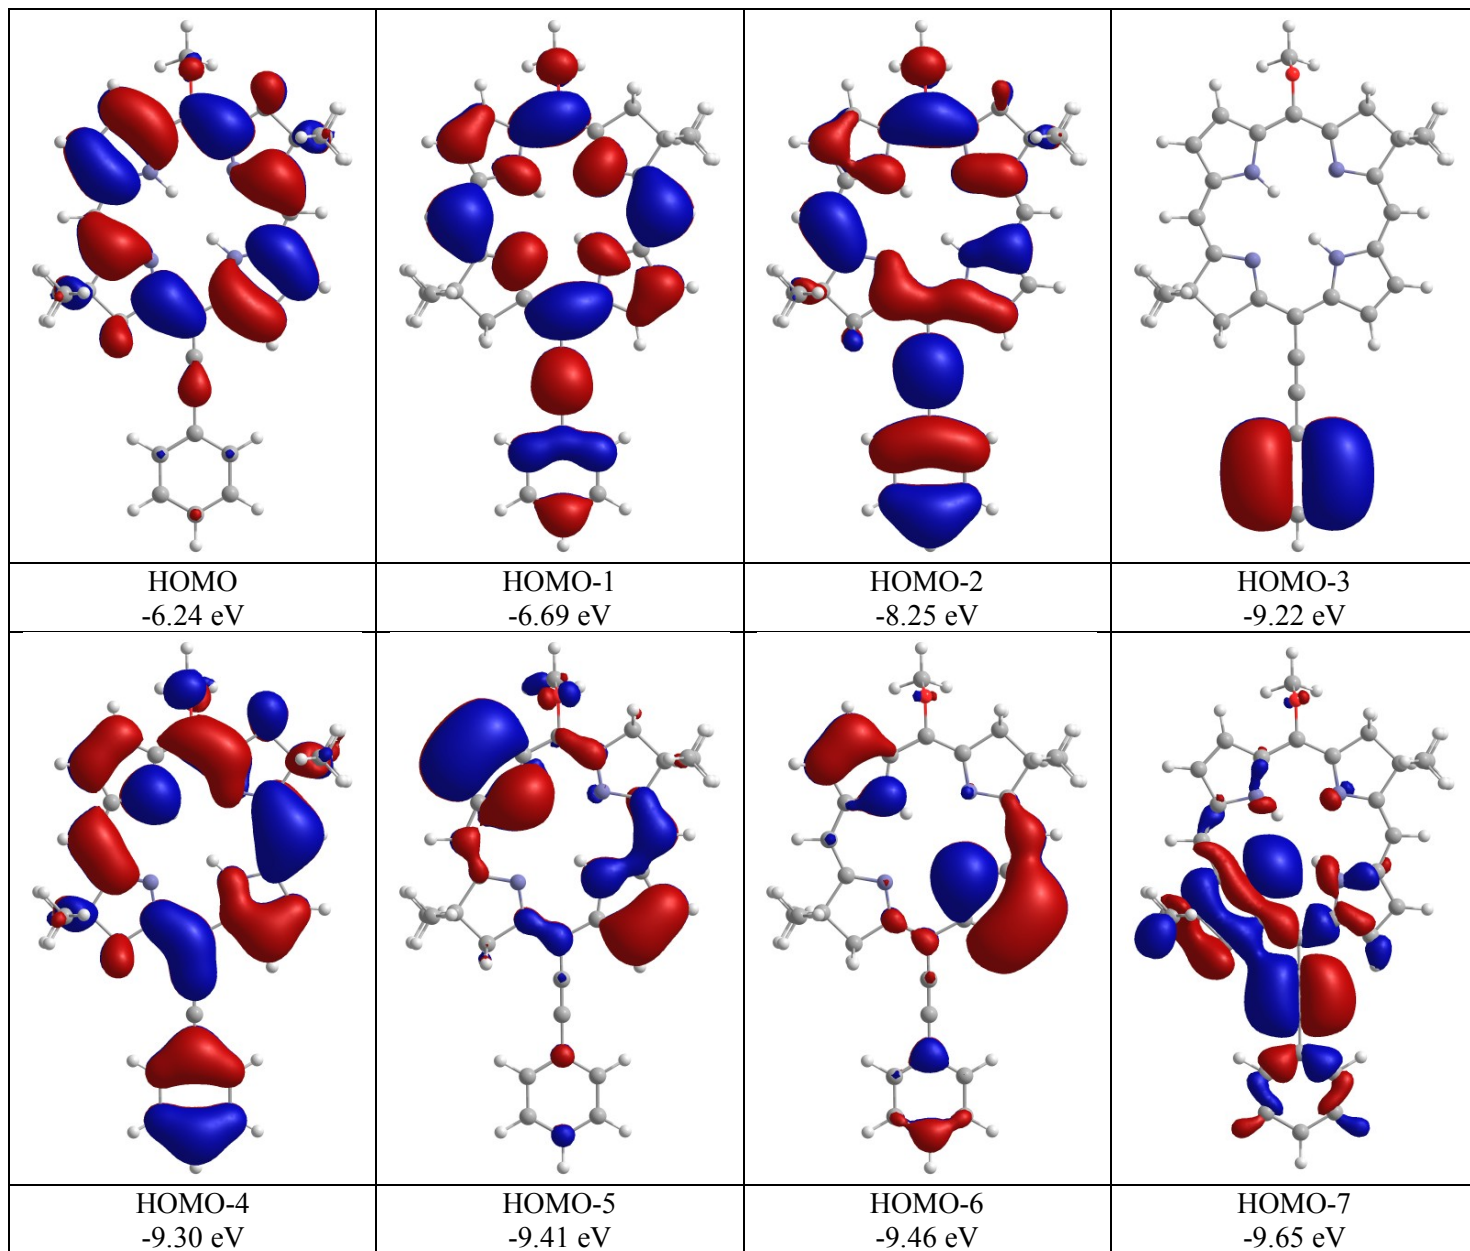

**Table S4.** Results of TDDFT calculations on pentad **BC-T-PDI** in toluene.<sup>a</sup>

| State          | $\lambda$<br>(nm) | Shifted $\lambda^b$<br>(nm) | f     | filled MO | empty MO | %   |
|----------------|-------------------|-----------------------------|-------|-----------|----------|-----|
| S <sub>1</sub> | 730               | 746                         | 0.45  | H-2       | L+9      | 4   |
|                |                   |                             |       | H         | L+2      | 81  |
|                |                   |                             |       | H         | L+4      | 8   |
| S <sub>2</sub> | 710               | 725                         | 1.49  | H-5       | L+1      | 2   |
|                |                   |                             |       | H-5       | L+5      | 3   |
|                |                   |                             |       | H-4       | L+1      | 4   |
|                |                   |                             |       | H-4       | L+4      | 9   |
|                |                   |                             |       | H-3       | L+3      | 3   |
|                |                   |                             |       | H-2       | L+1      | 4   |
|                |                   |                             |       | H-1       | L+1      | 60  |
|                |                   |                             |       | H-1       | L+4      | 3   |
| H-1            | L+5               | 4                           |       |           |          |     |
| S <sub>3</sub> | 627               | 639                         | 0.36  | H-5       | L+4      | 6   |
|                |                   |                             |       | H-4       | L+1      | 33  |
|                |                   |                             |       | H-4       | L+5      | 7   |
|                |                   |                             |       | H-2       | L+4      | 2   |
|                |                   |                             |       | H-1       | L+1      | 8   |
|                |                   |                             |       | H-1       | L+2      | 5   |
|                |                   |                             |       | H-1       | L+4      | 32  |
|                |                   |                             |       | H-2       | L+2      | 66  |
|                |                   |                             |       | H-2       | L+4      | 5   |
|                |                   |                             |       | H-1       | L+2      | 8   |
|                |                   |                             |       | H         | L+9      | 9   |
| H              | L+10              | 2                           |       |           |          |     |
| S <sub>4</sub> | 566               | 575                         | 0.63  | H-2       | L+2      | 66  |
|                |                   |                             |       | H-2       | L+4      | 5   |
|                |                   |                             |       | H-1       | L+2      | 8   |
|                |                   |                             |       | H         | L+9      | 10  |
|                |                   |                             |       | H         | L+10     | 2   |
| S <sub>5</sub> | 505               | 513                         | 0.022 | H-5       | L+3      | 15  |
|                |                   |                             |       | H-3       | L+1      | 31  |
|                |                   |                             |       | H-3       | L+5      | 15  |
|                |                   |                             |       | H-2       | L+3      | 3   |
|                |                   |                             |       | H-1       | L+3      | 26  |
| S <sub>6</sub> | 497               | 505                         | 2.61  | H-5       | L+1      | 16  |
|                |                   |                             |       | H-5       | L+5      | 5   |
|                |                   |                             |       | H-4       | L+2      | 2   |
|                |                   |                             |       | H-4       | L+4      | 17  |
|                |                   |                             |       | H-3       | L+3      | 30  |
|                |                   |                             |       | H-1       | L+1      | 2   |
|                |                   |                             |       | H-1       | L+5      | 17  |
| S <sub>7</sub> | 485               | 492                         | 1.46  | H-6       | L        | 2.2 |
| S <sub>8</sub> | 428               | 433                         | 2.19  | H-5       | L+4      | 3   |
|                |                   |                             |       | H-4       | L+1      | 43  |
|                |                   |                             |       | H-4       | L+5      | 6   |

|                 |     |     |       |      |      |    |
|-----------------|-----|-----|-------|------|------|----|
|                 |     |     |       | H-1  | L+2  | 5  |
|                 |     |     |       | H-1  | L+4  | 31 |
| S <sub>9</sub>  | 408 | 413 | 0.65  | H-5  | L+5  | 16 |
|                 |     |     |       | H-4  | L+2  | 7  |
|                 |     |     |       | H-4  | L+4  | 51 |
|                 |     |     |       | H-3  | L+3  | 9  |
|                 |     |     |       | H-1  | L+1  | 29 |
|                 |     |     |       | H-1  | L+5  | 7  |
| S <sub>10</sub> | 384 | 388 | 0.004 | H-16 | L+1  | 3  |
|                 |     |     |       | H-3  | L+1  | 7  |
|                 |     |     |       | H-3  | L+5  | 7  |
|                 |     |     |       | H-2  | L+1  | 4  |
|                 |     |     |       | H    | L+1  | 67 |
| S <sub>11</sub> | 383 | 387 | 0.001 | H-16 | L+1  | 8  |
|                 |     |     |       | H-5  | L+3  | 2  |
|                 |     |     |       | H-3  | L+1  | 25 |
|                 |     |     |       | H-3  | L+5  | 20 |
|                 |     |     |       | H-1  | L+3  | 3  |
|                 |     |     |       | H    | L+1  | 23 |
| S <sub>12</sub> | 364 | 368 | 0.44  | H-16 | L+1  | 2  |
|                 |     |     |       | H-10 | L+2  | 3  |
|                 |     |     |       | H-5  | L+3  | 10 |
|                 |     |     |       | H-3  | L+1  | 9  |
|                 |     |     |       | H-2  | L+2  | 3  |
|                 |     |     |       | H-2  | L+9  | 3  |
|                 |     |     |       | H-1  | L+2  | 3  |
|                 |     |     |       | H-1  | L+3  | 19 |
|                 |     |     |       | H-1  | L+8  | 3  |
|                 |     |     |       | H-1  | L+9  | 2  |
|                 |     |     |       | H    | L+9  | 11 |
|                 |     |     |       | H    | L+10 | 4  |
| S <sub>13</sub> | 360 | 364 | 0.35  | H-10 | L+2  | 2  |
|                 |     |     |       | H-8  | L+1  | 4  |
|                 |     |     |       | H-8  | L+3  | 7  |
|                 |     |     |       | H-8  | L+5  | 5  |
|                 |     |     |       | H-5  | L+1  | 3  |
|                 |     |     |       | H-5  | L+3  | 4  |
|                 |     |     |       | H-2  | L+1  | 4  |
|                 |     |     |       | H-2  | L+2  | 5  |
|                 |     |     |       | H-1  | L+3  | 8  |
|                 |     |     |       | H-1  | L+10 | 2  |
|                 |     |     |       | H    | L+9  | 19 |
|                 |     |     |       | H    | L+10 | 4  |
| S <sub>14</sub> | 358 | 362 | 0.20  | H-25 | L+3  | 2  |
|                 |     |     |       | H-9  | L+1  | 9  |
|                 |     |     |       | H-9  | L+3  | 10 |
|                 |     |     |       | H-9  | L+5  | 13 |
|                 |     |     |       | H-8  | L+3  | 9  |

|                 |     |     |      |      |     |    |
|-----------------|-----|-----|------|------|-----|----|
|                 |     |     |      | H    | L+1 | 7  |
|                 |     |     |      | H    | L+9 | 7  |
| S <sub>15</sub> | 357 | 361 | 0.87 | H-25 | L+5 | 2  |
|                 |     |     |      | H-24 | L+3 | 2  |
|                 |     |     |      | H-16 | L+1 | 2  |
|                 |     |     |      | H-9  | L+3 | 15 |
|                 |     |     |      | H-8  | L+1 | 9  |
|                 |     |     |      | H-8  | L+3 | 10 |
|                 |     |     |      | H-8  | L+5 | 14 |
|                 |     |     |      | H-5  | L+3 | 2  |
|                 |     |     |      | H-1  | L+3 | 3  |
|                 |     |     |      | H    | L+9 | 4  |
| S <sub>16</sub> | 356 | 360 | 0.13 | H-9  | L+1 | 3  |
|                 |     |     |      | H-9  | L+3 | 4  |
|                 |     |     |      | H-9  | L+5 | 6  |
|                 |     |     |      | H-8  | L+3 | 5  |
|                 |     |     |      | H-5  | L+1 | 22 |
|                 |     |     |      | H-2  | L+1 | 16 |
|                 |     |     |      | H-2  | L+5 | 3  |
|                 |     |     |      | H-1  | L+5 | 12 |
|                 |     |     |      | H    | L+1 | 2  |
|                 |     |     |      | H    | L+9 | 2  |

<sup>a</sup> H = HOMO and L = LUMO. <sup>b</sup>Shifted by 300 cm<sup>-1</sup> to improve overlap with the measured spectrum for plotting.

**Table S5.** Results of TDDFT calculations on pentad **BC-T-PDI** in DMSO.<sup>a</sup>

| State          | $\lambda$<br>(nm) | Shifted $\lambda^b$<br>(nm) | f     | filled MO | empty MO | %   |
|----------------|-------------------|-----------------------------|-------|-----------|----------|-----|
| S <sub>1</sub> | 729               | 745                         | 0.43  | H-2       | L+8      | 4.7 |
|                |                   |                             |       | H         | L+2      | 79  |
|                |                   |                             |       | H         | L+4      | 8.6 |
| S <sub>2</sub> | 711               | 726                         | 1.57  | H-5       | L        | 2.2 |
|                |                   |                             |       | H-5       | L+5      | 2.9 |
|                |                   |                             |       | H-4       | L        | 4.2 |
|                |                   |                             |       | H-4       | L+4      | 8.2 |
|                |                   |                             |       | H-3       | L+3      | 3   |
|                |                   |                             |       | H-2       | L        | 3.5 |
|                |                   |                             |       | H-1       | L        | 61  |
|                |                   |                             |       | H-1       | L+4      | 3.4 |
| H-1            | L+5               | 3.3                         |       |           |          |     |
| S <sub>3</sub> | 625               | 637                         | 0.35  | H-5       | L+4      | 6.2 |
|                |                   |                             |       | H-4       | L        | 33  |
|                |                   |                             |       | H-4       | L+5      | 6.1 |
|                |                   |                             |       | H-1       | L        | 7.1 |
|                |                   |                             |       | H-1       | L+2      | 5.6 |
| H-1            | L+4               | 32                          |       |           |          |     |
| S <sub>4</sub> | 563               | 572                         | 0.61  | H-2       | L+2      | 64  |
|                |                   |                             |       | H-2       | L+4      | 6.1 |
|                |                   |                             |       | H-1       | L+2      | 8   |
|                |                   |                             |       | H         | L+8      | 9.6 |
| H              | L+10              | 3                           |       |           |          |     |
| S <sub>5</sub> | 509               | 517                         | 0.018 | H-5       | L+3      | 15  |
|                |                   |                             |       | H-3       | L        | 31  |
|                |                   |                             |       | H-3       | L+5      | 16  |
|                |                   |                             |       | H-2       | L+3      | 2.9 |
|                |                   |                             |       | H-1       | L+3      | 26  |
| S <sub>6</sub> | 500               | 508                         | 2.50  | H-5       | L        | 17  |
|                |                   |                             |       | H-5       | L+5      | 4.8 |
|                |                   |                             |       | H-4       | L+2      | 2.3 |
|                |                   |                             |       | H-4       | L+4      | 17  |
|                |                   |                             |       | H-3       | L+3      | 30  |
|                |                   |                             |       | H-1       | L        | 2.1 |
| H-1            | L+5               | 18                          |       |           |          |     |
| S <sub>7</sub> | 486               | 494                         | 1.49  | H-6       | L        | 2.2 |
| S <sub>8</sub> | 424               | 430                         | 2.20  | H-5       | L+4      | 2.9 |
|                |                   |                             |       | H-4       | L        | 43  |
|                |                   |                             |       | H-4       | L+5      | 6.3 |
|                |                   |                             |       | H-1       | L+2      | 5.7 |
| H-1            | L+4               | 32                          |       |           |          |     |
| S <sub>9</sub> | 407               | 412                         | 0.68  | H-5       | L+5      | 5.5 |
|                |                   |                             |       | H-4       | L+2      | 7.4 |
|                |                   |                             |       | H-4       | L+4      | 49  |
|                |                   |                             |       | H-3       | L+3      | 8.7 |

|                 |     |     |       |      |      |     |
|-----------------|-----|-----|-------|------|------|-----|
|                 |     |     |       | H-1  | L    | 9.9 |
|                 |     |     |       | H-1  | L+5  | 7   |
| S <sub>10</sub> | 387 | 392 | 0.006 | H-2  | L    | 4.9 |
|                 |     |     |       | H    | L    | 84  |
| S <sub>11</sub> | 386 | 390 | 0.001 | H-16 | L    | 9.9 |
|                 |     |     |       | H-5  | L+3  | 2.7 |
|                 |     |     |       | H-3  | L    | 32  |
|                 |     |     |       | H-3  | L+5  | 25  |
|                 |     |     |       | H-1  | L+3  | 4.7 |
|                 |     |     |       | H-1  | L+7  | 2.4 |
|                 |     |     |       | H    | L    | 6.0 |
| S <sub>12</sub> | 364 | 368 | 0.45  | H-9  | L+3  | 11  |
|                 |     |     |       | H-8  | L    | 5.3 |
|                 |     |     |       | H-8  | L+5  | 7.7 |
|                 |     |     |       | H-5  | L+3  | 8.8 |
|                 |     |     |       | H-3  | L    | 7.4 |
|                 |     |     |       | H-1  | L+3  | 16  |
|                 |     |     |       | H-1  | L+7  | 2.4 |
|                 |     |     |       | H    | L+8  | 3.0 |
| S <sub>13</sub> | 360 | 367 | 0.12  | H-29 | L+3  | 2.3 |
|                 |     |     |       | H-9  | L    | 12  |
|                 |     |     |       | H-9  | L+5  | 17  |
|                 |     |     |       | H-8  | L+3  | 29  |
|                 |     |     |       | H-5  | L    | 2.8 |
| S <sub>14</sub> | 362 | 365 | 0.007 | H-10 | L+2  | 2.3 |
|                 |     |     |       | H-9  | L+3  | 18  |
|                 |     |     |       | H-9  | L+5  | 2.2 |
|                 |     |     |       | H-8  | L    | 6.7 |
|                 |     |     |       | H-8  | L+5  | 9.9 |
|                 |     |     |       | H-5  | L+3  | 2.2 |
|                 |     |     |       | H-2  | L+2  | 2.5 |
|                 |     |     |       | H-1  | L+3  | 2.9 |
|                 |     |     |       | H    | L+8  | 8.1 |
|                 |     |     |       | H    | L+10 | 3.1 |
| S <sub>15</sub> | 359 | 363 | 0.067 | H-8  | L+3  | 3.0 |
|                 |     |     |       | H-5  | L    | 27  |
|                 |     |     |       | H-2  | L    | 22  |
|                 |     |     |       | H-2  | L+5  | 3.1 |
|                 |     |     |       | H-1  | L+3  | 2.2 |
|                 |     |     |       | H-1  | L+5  | 12  |
|                 |     |     |       | H    | L    | 2.9 |
| S <sub>16</sub> | 357 | 361 | 1.3   | H-16 | L    | 2.7 |
|                 |     |     |       | H-10 | L+2  | 3.4 |
|                 |     |     |       | H-5  | L    | 3.1 |
|                 |     |     |       | H-5  | L+3  | 5.0 |
|                 |     |     |       | H-2  | L+2  | 8.3 |
|                 |     |     |       | H-1  | L+3  | 9.7 |
|                 |     |     |       | H-1  | L+10 | 2.4 |

|   |      |     |
|---|------|-----|
| H | L+7  | 2.2 |
| H | L+8  | 28  |
| H | L+10 | 8.0 |

<sup>a</sup> H = HOMO and L = LUMO. <sup>b</sup>Shifted by 300 cm<sup>-1</sup> to improve overlap with the measured spectrum for plotting for the pentad in toluene (to use a consistent shift).

**Table S6.** Results of TDDFT calculations on bacteriochlorin monomer **MeOBC-1** in toluene.<sup>a</sup>

| State           | $\lambda$<br>(nm) | Shifted $\lambda^b$<br>(nm) | f      | filled MO | empty MO | %   |
|-----------------|-------------------|-----------------------------|--------|-----------|----------|-----|
| S <sub>1</sub>  | 727               | 738                         | 0.41   | H-1       | L+1      | 5.1 |
|                 |                   |                             |        | H         | L        | 91  |
| S <sub>2</sub>  | 564               | 570                         | 0.41   | H-1       | L        | 83  |
|                 |                   |                             |        | H         | L+1      | 14  |
| S <sub>3</sub>  | 359               | 361                         | 1.6    | H-2       | L        | 6.5 |
|                 |                   |                             |        | H-1       | L        | 14  |
|                 |                   |                             |        | H-1       | L+1      | 6.1 |
|                 |                   |                             |        | H         | L+1      | 68  |
|                 |                   |                             |        | H         | L+2      | 4.0 |
| S <sub>4</sub>  | 337               | 340                         | 1.4    | H-2       | L        | 5.3 |
|                 |                   |                             |        | H-2       | L+2      | 2.2 |
|                 |                   |                             |        | H-1       | L+1      | 73  |
|                 |                   |                             |        | H         | L        | 5.4 |
|                 |                   |                             |        | H         | L+1      | 10  |
| S <sub>5</sub>  | 317               | 319                         | 0.17   | H-6       | L        | 2.9 |
|                 |                   |                             |        | H-4       | L        | 7.0 |
|                 |                   |                             |        | H-2       | L        | 70  |
|                 |                   |                             |        | H-1       | L+1      | 9.0 |
|                 |                   |                             |        | H         | L+1      | 3.8 |
| S <sub>6</sub>  | 286               | 287                         | 0.006  | H-10      | L        | 41  |
|                 |                   |                             |        | H-9       | L        | 3.6 |
|                 |                   |                             |        | H-8       | L        | 44  |
| S <sub>7</sub>  | 283               | 284                         | 0.05   | H-6       | L        | 76  |
|                 |                   |                             |        | H-5       | L        | 6.9 |
|                 |                   |                             |        | H-1       | L+2      | 5.2 |
|                 |                   |                             |        | H         | L+2      | 2.4 |
| S <sub>8</sub>  | 278               | 279                         | 0.0002 | H-10      | L        | 16  |
|                 |                   |                             |        | H-8       | L        | 19  |
|                 |                   |                             |        | H-7       | L        | 53  |
| S <sub>9</sub>  | 277               | 278                         | 0.005  | H-9       | L        | 3.9 |
|                 |                   |                             |        | H-6       | L        | 6.9 |
|                 |                   |                             |        | H-5       | L        | 37  |
|                 |                   |                             |        | H-4       | L        | 33  |
|                 |                   |                             |        | H-1       | L+1      | 4.1 |
| S <sub>10</sub> | 273               | 274                         | 0.13   | H-6       | L        | 2.8 |
|                 |                   |                             |        | H-5       | L        | 14  |
|                 |                   |                             |        | H-2       | L        | 4.1 |

|                 |     |     |       |      |      |     |
|-----------------|-----|-----|-------|------|------|-----|
|                 |     |     |       | H-2  | L+1  | 5.5 |
|                 |     |     |       | H-2  | L+2  | 3.6 |
|                 |     |     |       | H-1  | L+2  | 25  |
|                 |     |     |       | H    | L+2  | 33  |
| S <sub>11</sub> | 262 | 264 | 0.001 | H-9  | L    | 10  |
|                 |     |     |       | H-6  | L    | 2.1 |
|                 |     |     |       | H-5  | L    | 19  |
|                 |     |     |       | H-4  | L    | 15  |
|                 |     |     |       | H-2  | L+1  | 3.8 |
|                 |     |     |       | H-1  | L+2  | 7.0 |
|                 |     |     |       | H    | L+2  | 16  |
|                 |     |     |       | H    | L+3  | 5.7 |
|                 |     |     |       | H    | L+12 | 2.1 |
|                 |     |     |       | H    | L+15 | 2.3 |
| S <sub>12</sub> | 261 | 262 | 0.004 | H-5  | L    | 2.7 |
|                 |     |     |       | H-4  | L    | 2.7 |
|                 |     |     |       | H    | L+3  | 44  |
|                 |     |     |       | H    | L+4  | 4.1 |
|                 |     |     |       | H    | L+5  | 3.5 |
|                 |     |     |       | H    | L+9  | 2.8 |
|                 |     |     |       | H    | L+12 | 20  |
|                 |     |     |       | H    | L+28 | 3.3 |
| S <sub>13</sub> | 253 | 254 | 0.002 | H-10 | L    | 21  |
|                 |     |     |       | H-8  | L    | 20  |
|                 |     |     |       | H-8  | L+2  | 2.4 |
|                 |     |     |       | H-7  | L    | 25  |
|                 |     |     |       | H-7  | L+1  | 3.6 |
|                 |     |     |       | H-7  | L+2  | 5.5 |
|                 |     |     |       | H-4  | L    | 2.5 |
|                 |     |     |       | H-1  | L+2  | 3.8 |
|                 |     |     |       | H    | L+2  | 2.3 |
| S <sub>14</sub> | 253 | 254 | 0.013 | H-9  | L    | 6.7 |
|                 |     |     |       | H-8  | L    | 4.0 |
|                 |     |     |       | H-7  | L    | 5.6 |
|                 |     |     |       | H-5  | L    | 5.6 |
|                 |     |     |       | H-4  | L    | 9.5 |
|                 |     |     |       | H-3  | L+2  | 2.6 |
|                 |     |     |       | H-2  | L+6  | 3.3 |
|                 |     |     |       | H-1  | L+2  | 21  |
|                 |     |     |       | H-1  | L+6  | 3.3 |
|                 |     |     |       | H    | L+2  | 15  |
| S <sub>15</sub> | 252 | 253 | 0.001 | H-4  | L    | 2.1 |
|                 |     |     |       | H-4  | L+6  | 2.9 |
|                 |     |     |       | H-3  | L    | 8.7 |
|                 |     |     |       | H-3  | L+1  | 4.1 |
|                 |     |     |       | H-3  | L+2  | 17  |
|                 |     |     |       | H-2  | L+6  | 20  |
|                 |     |     |       | H-1  | L+2  | 4.2 |



|                 |     |     |        |     |     |     |
|-----------------|-----|-----|--------|-----|-----|-----|
|                 |     |     |        | H-1 | L+6 | 22  |
|                 |     |     |        | H   | L+2 | 3.2 |
|                 |     |     |        | H   | L+6 | 4.7 |
| S <sub>16</sub> | 242 | 243 | 0.0001 | H-2 | L+3 | 2.1 |
|                 |     |     |        | H   | L+4 | 54  |
|                 |     |     |        | H   | L+5 | 18  |
|                 |     |     |        | H   | L+8 | 2.9 |
|                 |     |     |        | H   | L+7 | 5.9 |

<sup>a</sup> H = HOMO and L = LUMO. <sup>b</sup>Shifted by 200 cm<sup>-1</sup> to improve overlap with the measured spectrum for plotting.

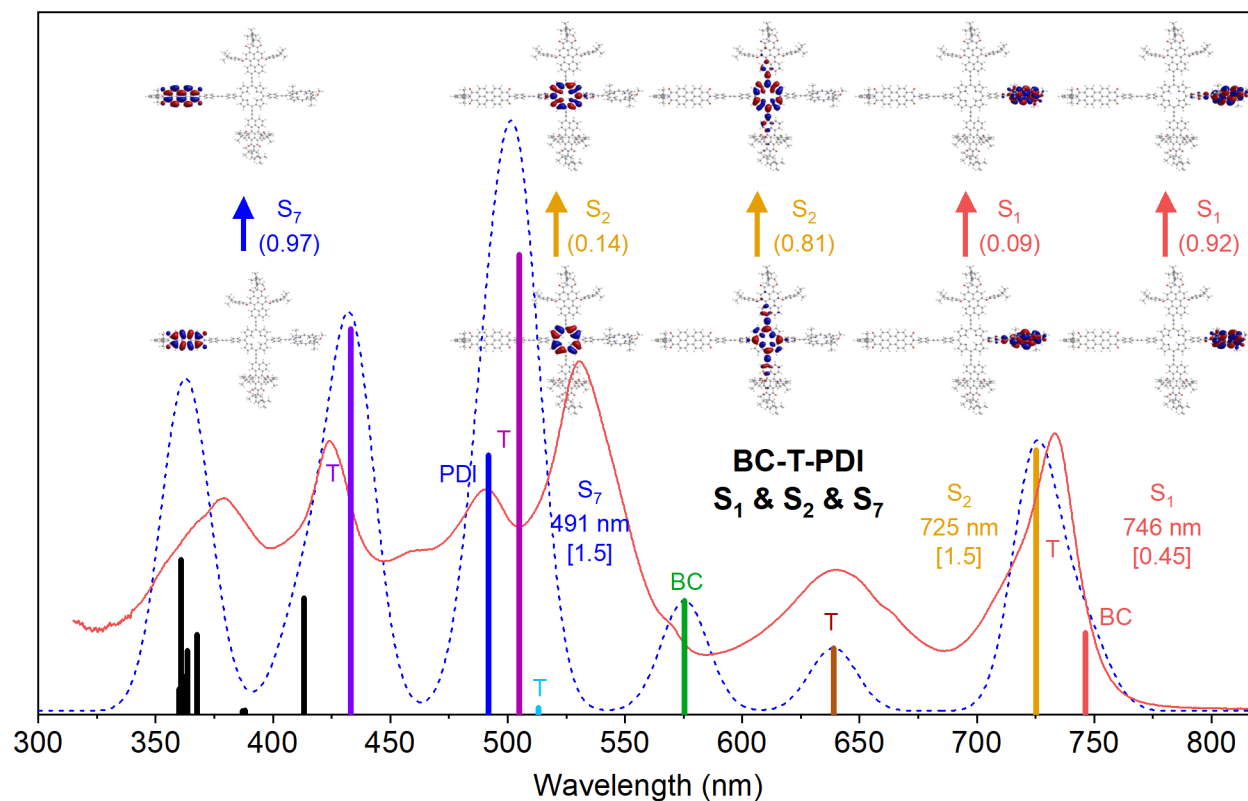

**Figure S18.** Absorption spectra calculated by TDDFT (colored sticks and blue dashed lines using 10-nm Gaussian skirts) are given along with pairs of occupied and virtual NTOs for absorption from  $S_0$  to  $S_1$  and  $S_2$  and  $S_7$  for pentad **BC-T-PDI** in toluene. The calculated spectra are shifted to lower energy by 300 cm<sup>-1</sup> to best align with the measured spectrum (red solid line). The eigenvalue (weight) for each pair of natural transition orbitals that contribute to a transition is indicated in parenthesis. The calculated wavelength and oscillator strength (in square brackets) for each transition are given at the bottom of each panel.

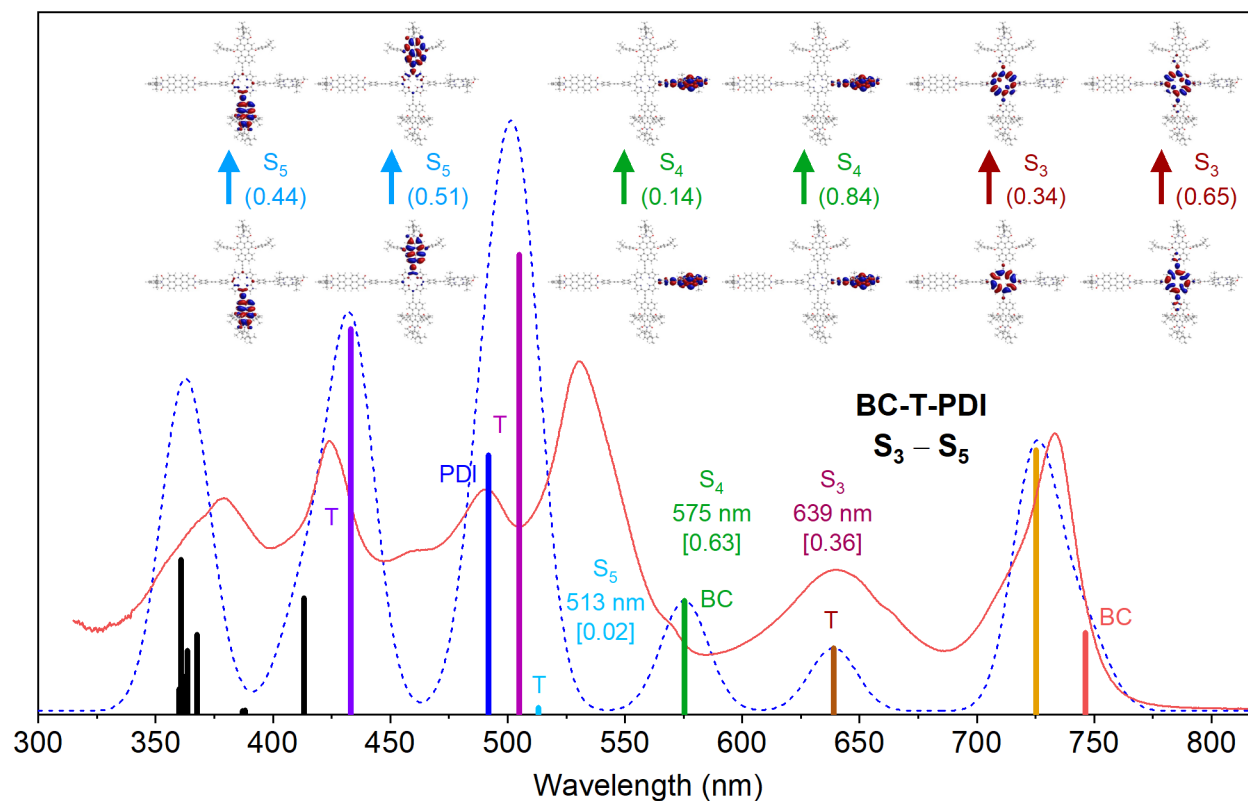

**Figure S19.** Absorption spectra calculated by TDDFT (colored sticks and blue dashed lines using 10-nm Gaussian skirts) are given along with pairs of occupied and virtual NTOs for absorption from  $S_0$  to  $S_3 - S_5$  for pentad **BC-T-PDI** in toluene. The calculated spectra are shifted to lower energy by  $300 \text{ cm}^{-1}$  to best align with the measured spectrum (red solid line). The eigenvalue (weight) for each pair of NTOs that contribute to a transition is indicated in parenthesis. The calculated wavelength and oscillator strength (in square brackets) for each transition are given at the bottom of each panel.

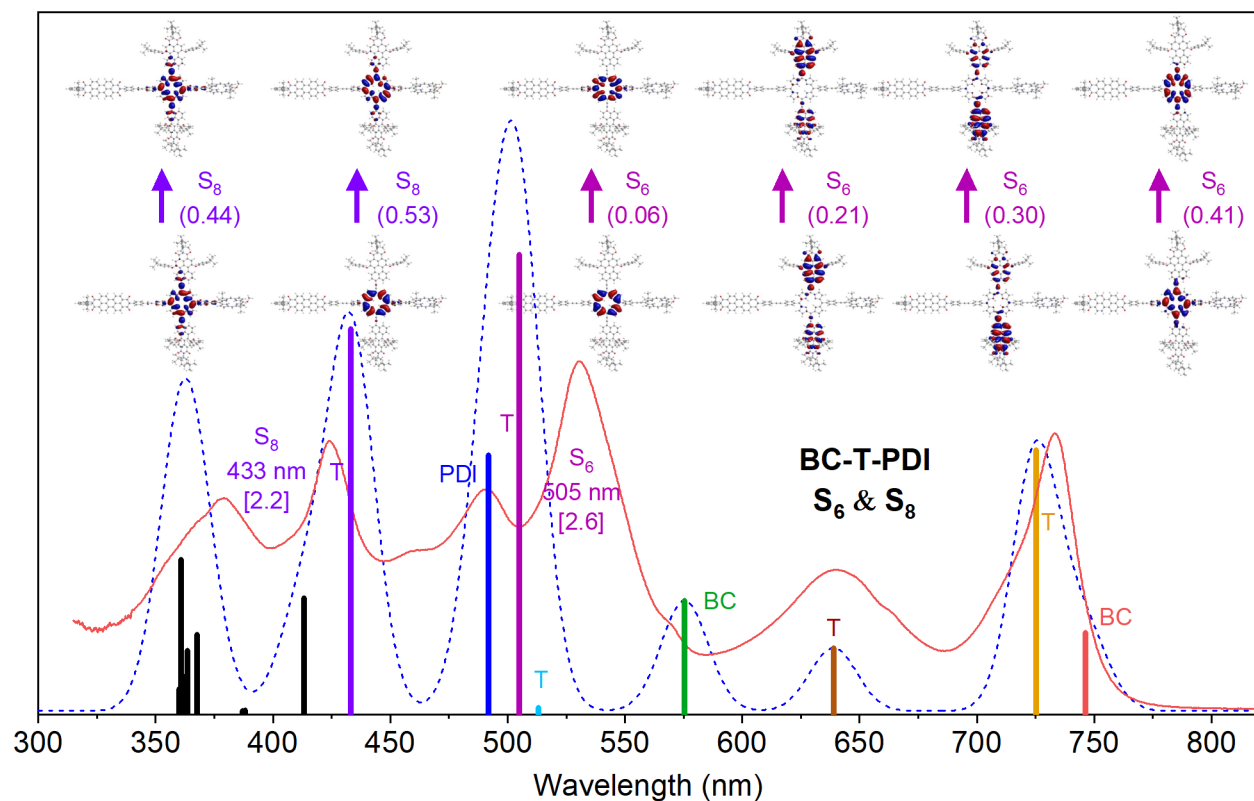

**Figure S20.** Absorption spectra calculated by TDDFT (colored sticks and blue dashed lines using 10-nm Gaussian skirts) are given along with pairs of occupied and virtual NTOs for absorption from  $S_0$  to  $S_6$  and  $S_8$  for pentad **BC-T-PDI** in toluene. The calculated spectra are shifted to lower energy by  $300 \text{ cm}^{-1}$  to best align with the measured spectrum (red solid line). The eigenvalue (weight) for each pair of NTOs that contribute to a transition is indicated in parenthesis. The calculated wavelength and oscillator strength (in square brackets) for each transition are given at the bottom of each panel.

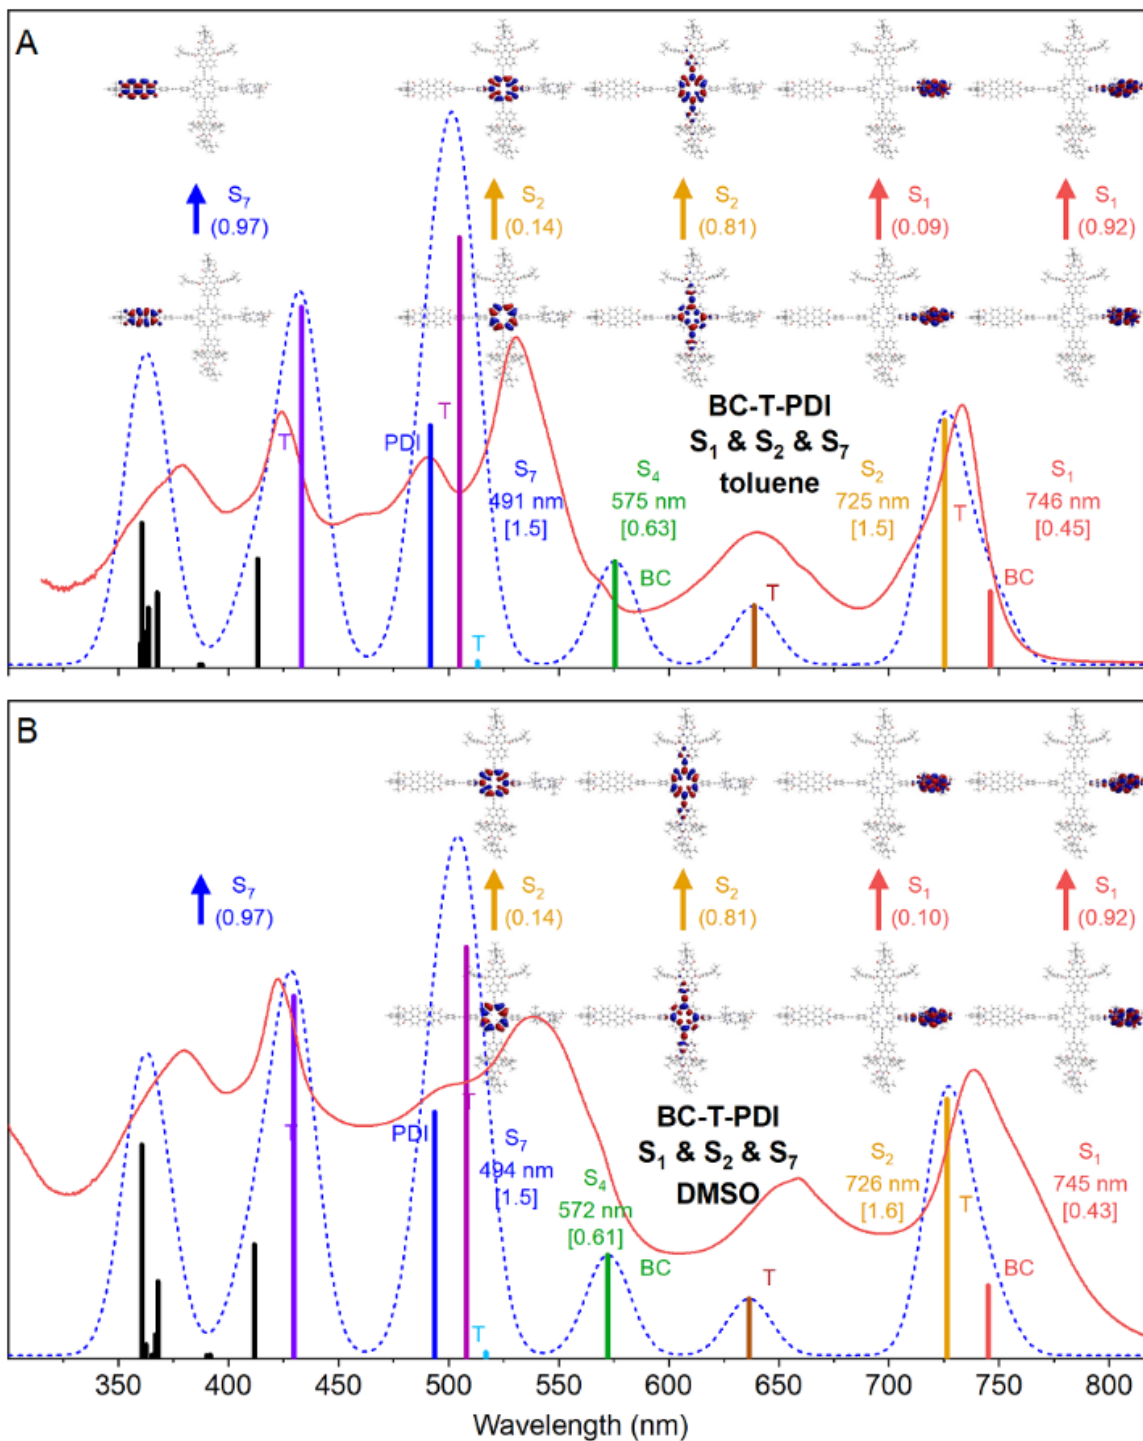

**Figure S21.** Absorption spectra calculated by TDDFT (colored sticks and blue dashed lines using 10-nm Gaussian skirts) are given along with pairs of occupied and virtual NTOs for absorption from  $S_0$  to  $S_1$  and  $S_2$  for pentad **BC-T-PDI** in toluene (A) and DMSO (B). The calculated spectra are shifted to lower energy by  $300\text{ cm}^{-1}$  to best align with the measured spectrum (red solid line) in toluene. The eigenvalue (weight) for each pair of NTOs that contribute to a transition is indicated in parenthesis. The calculated wavelength and oscillator strength (in square brackets) for various transitions are given at the bottom of each panel.

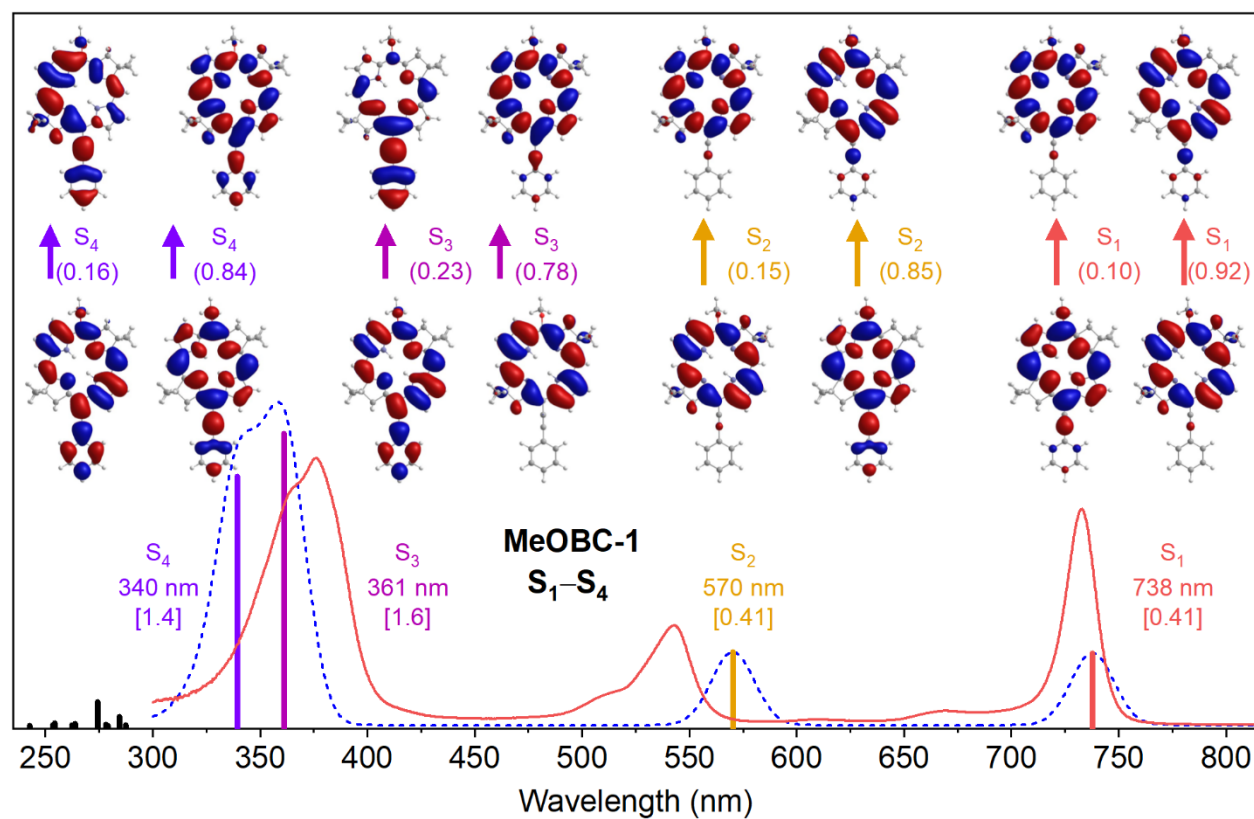

**Figure S22.** Absorption spectra calculated by TDDFT (colored sticks and blue dashed lines using 10-nm Gaussian skirts) are given along with pairs of occupied and virtual NTOs for absorption from  $S_0$  to  $S_1$  and  $S_2$  for pentad **MeOBC-1** in toluene. The calculated spectra are shifted to lower energy by  $200\text{ cm}^{-1}$  to best align with the measured spectrum (red solid line) in toluene. The eigenvalue (weight) for each pair of NTOs that contribute to a transition is indicated in parenthesis. The calculated wavelength and oscillator strength (in square brackets) for various transitions are given at the bottom of each panel.

**Table S7.** NTO pairs for pentad **BC-T-PDI** in toluene.

| State | Eigenvalue | From NTO                                                                            | To NTO                                                                               |
|-------|------------|-------------------------------------------------------------------------------------|--------------------------------------------------------------------------------------|
| S1    | 0.92158    | 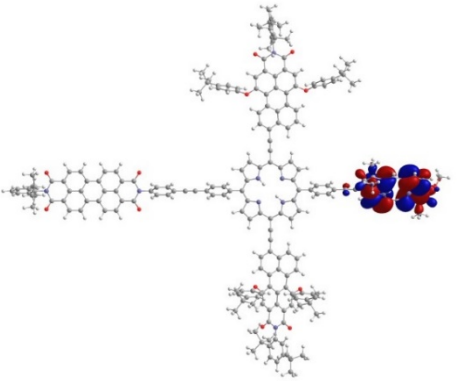   |    |
| S1    | 0.09370    |    |    |
| S2    | 0.81032    |   |   |
| S2    | 0.13869    |  |  |

|    |         |                                                                                     |                                                                                      |
|----|---------|-------------------------------------------------------------------------------------|--------------------------------------------------------------------------------------|
| S3 | 0.64670 | 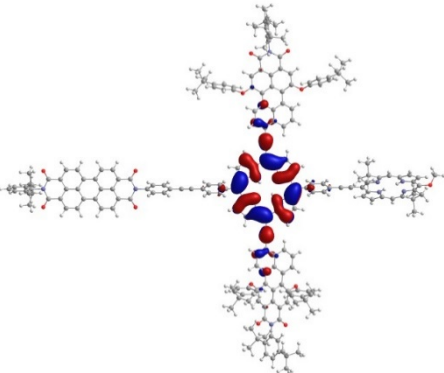   |    |
| S3 | 0.33934 |    |    |
| S4 | 0.84175 |   |   |
| S4 | 0.14032 |  |  |



|    |         |  |  |
|----|---------|--|--|
| S5 | 0.50656 |  |  |
| S5 | 0.43913 |  |  |
| S6 | 0.41263 |  |  |
| S6 | 0.30094 |  |  |

|    |         |                                                                                     |                                                                                      |
|----|---------|-------------------------------------------------------------------------------------|--------------------------------------------------------------------------------------|
| S6 | 0.20695 | 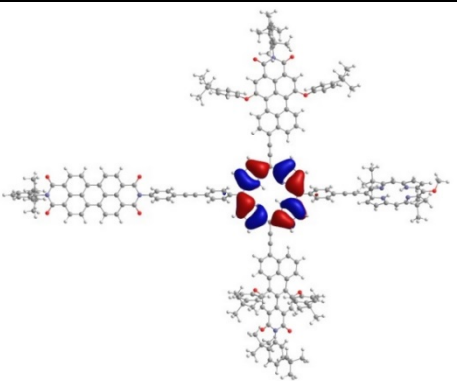   |    |
| S6 | 0.06277 |    |    |
| S7 | 0.96892 |   |   |
| S8 | 0.52573 |  |  |

|    |         |                                                                                     |                                                                                      |
|----|---------|-------------------------------------------------------------------------------------|--------------------------------------------------------------------------------------|
| S8 | 0.43847 | 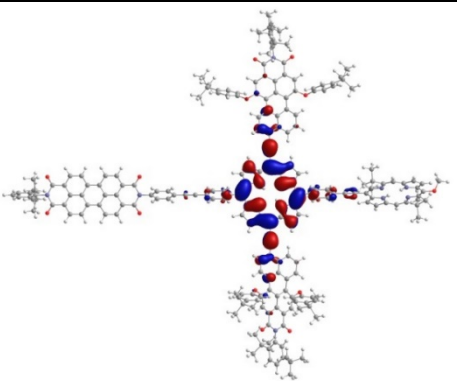   |    |
| S9 | 0.61401 |    |    |
| S9 | 0.19527 |   |   |
| S9 | 0.11185 |  |  |

|     |         |  |  |
|-----|---------|--|--|
| S9  | 0.08547 |  |  |
| S10 | 0.88583 |  |  |
| S10 | 0.06738 |  |  |
| S11 | 0.75216 |  |  |

|     |         |  |  |
|-----|---------|--|--|
| S11 | 0.13610 |  |  |
| S11 | 0.07588 |  |  |
| S12 | 0.44458 |  |  |
| S12 | 0.24299 |  |  |

|     |         |                                                                                     |                                                                                      |
|-----|---------|-------------------------------------------------------------------------------------|--------------------------------------------------------------------------------------|
| S12 | 0.13934 | 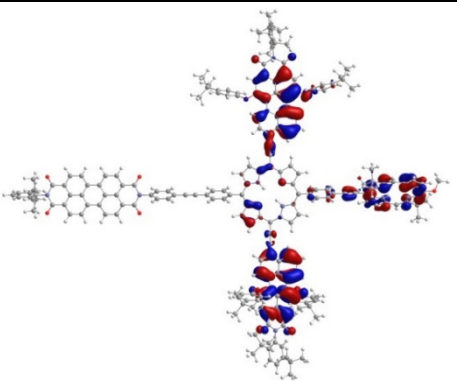   |    |
| S12 | 0.09808 |    |    |
| S13 | 0.34095 |   |   |
| S13 | 0.26974 |  |  |

|     |         |                                                                                     |                                                                                      |
|-----|---------|-------------------------------------------------------------------------------------|--------------------------------------------------------------------------------------|
| S13 | 0.17603 | 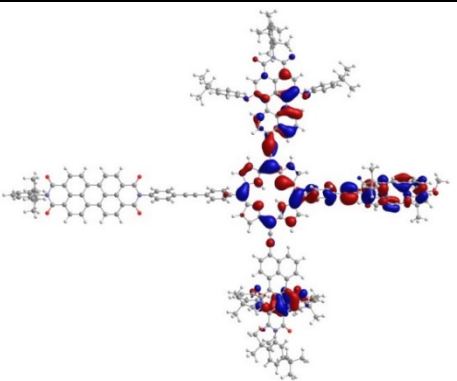   |    |
| S13 | 0.10373 |    |    |
| S13 | 0.05944 |   |   |
| S14 | 0.45092 |  |  |



|     |         |  |  |
|-----|---------|--|--|
| S14 | 0.18903 |  |  |
| S14 | 0.13802 |  |  |
| S14 | 0.09683 |  |  |
| S14 | 0.05804 |  |  |



|     |         |  |  |
|-----|---------|--|--|
| S15 | 0.48389 |  |  |
| S15 | 0.29019 |  |  |
| S15 | 0.05884 |  |  |
| S15 | 0.05085 |  |  |

|     |         |                                                                                    |                                                                                     |
|-----|---------|------------------------------------------------------------------------------------|-------------------------------------------------------------------------------------|
| S16 | 0.50794 | 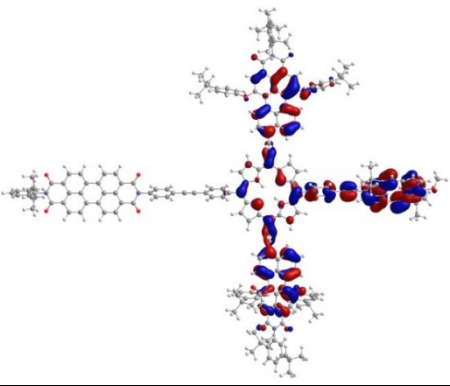  |   |
| S16 | 0.26255 |   |   |
| S16 | 0.12759 |  |  |

**Table S8.** NTO pairs for pentad **BC-T-PDI** in DMSO.

| S# | Eigenvalue | From NTO | To NTO |
|----|------------|----------|--------|
| S1 | 0.91904    |          |        |
| S1 | 0.09587    |          |        |
| S2 | 0.80848    |          |        |
| S2 | 0.13559    |          |        |

|    |         |                                                                                     |                                                                                      |
|----|---------|-------------------------------------------------------------------------------------|--------------------------------------------------------------------------------------|
| S3 | 0.63700 | 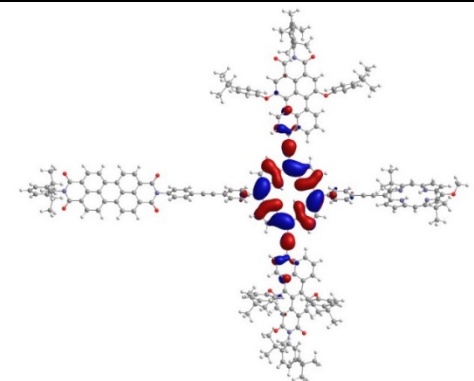   |    |
| S3 | 0.34831 |    |    |
| S4 | 0.83433 |   |   |
| S4 | 0.14562 |  |  |

|    |         |                                                                                     |                                                                                      |
|----|---------|-------------------------------------------------------------------------------------|--------------------------------------------------------------------------------------|
| S5 | 0.49275 | 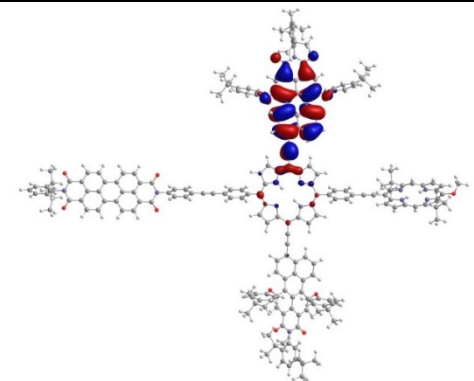   |    |
| S5 | 0.45143 |    |    |
| S6 | 0.40403 |   |   |
| S6 | 0.31023 |  |  |

|    |         |  |  |
|----|---------|--|--|
| S6 | 0.20052 |  |  |
| S6 | 0.06915 |  |  |
| S7 | 0.96767 |  |  |
| S8 | 0.52801 |  |  |

|    |         |  |  |
|----|---------|--|--|
| S8 | 0.43500 |  |  |
| S9 | 0.60414 |  |  |
| S9 | 0.20758 |  |  |
| S9 | 0.11303 |  |  |



|     |         |  |  |
|-----|---------|--|--|
| S9  | 0.08115 |  |  |
| S10 | 0.96195 |  |  |
| S11 | 0.74446 |  |  |
| S11 | 0.16773 |  |  |



|     |         |  |  |
|-----|---------|--|--|
| S12 | 0.47266 |  |  |
| S12 | 0.26140 |  |  |
| S12 | 0.07850 |  |  |
| S12 | 0.05103 |  |  |

|     |         |  |  |
|-----|---------|--|--|
| S13 | 0.49612 |  |  |
| S13 | 0.30981 |  |  |
| S13 | 0.09105 |  |  |
| S13 | 0.05224 |  |  |

|     |         |                                                                                     |                                                                                      |
|-----|---------|-------------------------------------------------------------------------------------|--------------------------------------------------------------------------------------|
| S14 | 0.40651 | 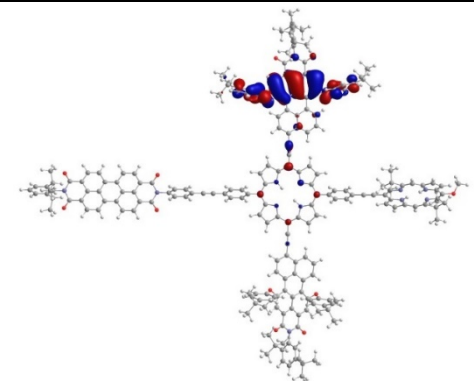   |    |
| S14 | 0.22562 |    |    |
| S14 | 0.16135 |   |   |
| S14 | 0.07991 |  |  |

|     |         |                                                                                     |                                                                                      |
|-----|---------|-------------------------------------------------------------------------------------|--------------------------------------------------------------------------------------|
| S15 | 0.63162 | 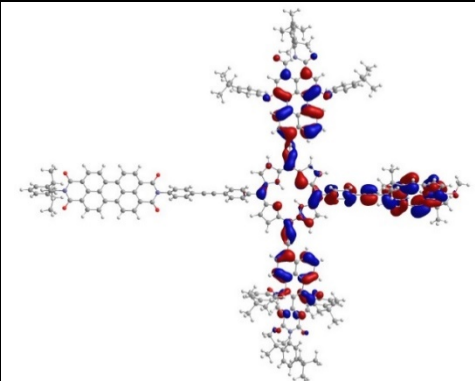   |    |
| S15 | 0.21480 |    |    |
| S15 | 0.08598 |   |   |
| S16 | 0.46780 |  |  |

|     |         |                                                                                    |                                                                                     |
|-----|---------|------------------------------------------------------------------------------------|-------------------------------------------------------------------------------------|
| S16 | 0.25716 | 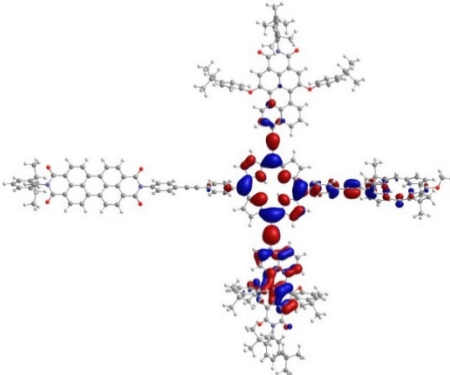  |   |
| S16 | 0.12978 |   |   |
| S16 | 0.08085 |  |  |

**Table S9.** NTOs for bacteriochlorin monomer **MeO-BC-1** in toluene.

| S# | Eigenvalue | From NTO                                                                            | To NTO                                                                               |
|----|------------|-------------------------------------------------------------------------------------|--------------------------------------------------------------------------------------|
| S1 | 0.92091    | 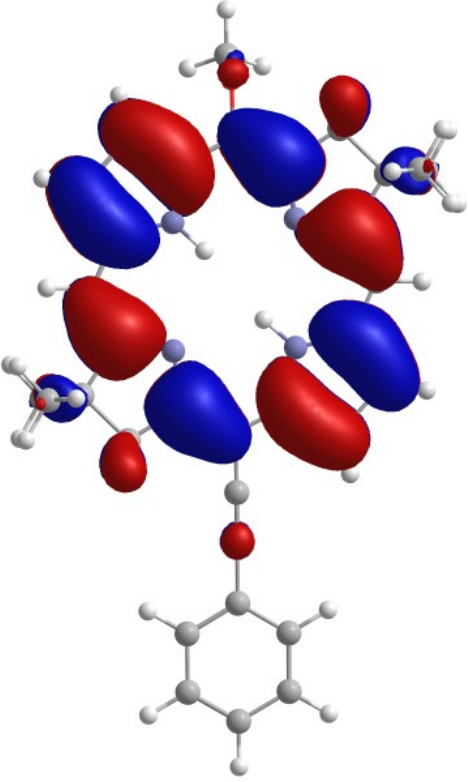  |   |
| S1 | 0.09594    |  |  |



|    |         |                                                                                    |                                                                                     |
|----|---------|------------------------------------------------------------------------------------|-------------------------------------------------------------------------------------|
| S2 | 0.85488 | 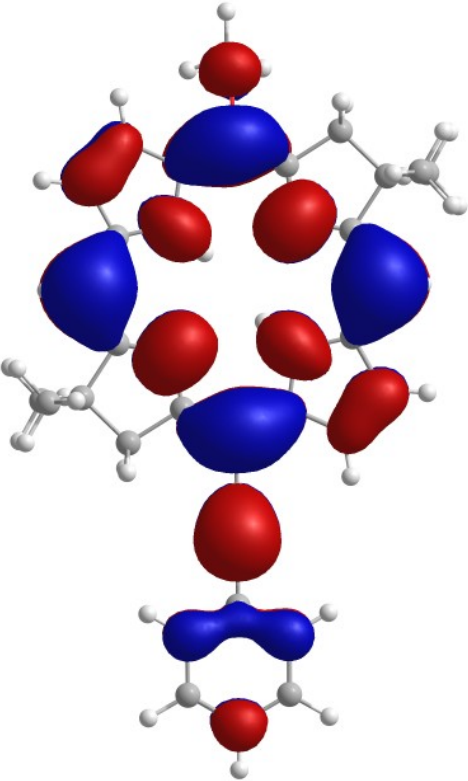  |   |
| S2 | 0.14559 |  |  |

|    |         |                                                                                    |                                                                                     |
|----|---------|------------------------------------------------------------------------------------|-------------------------------------------------------------------------------------|
| S3 | 0.78147 | 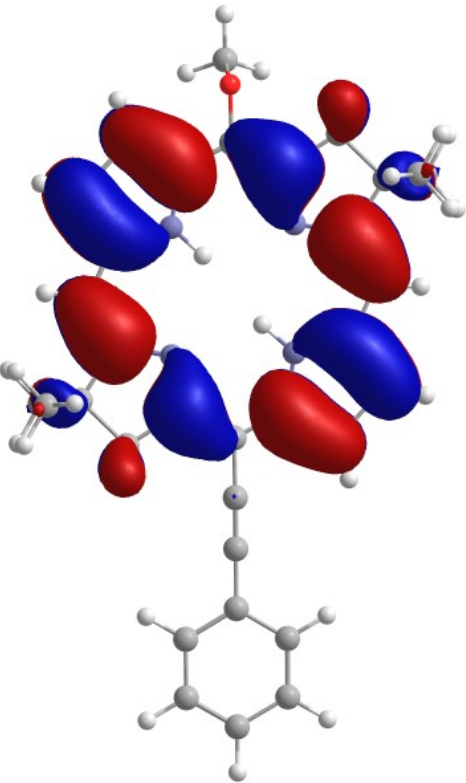  |   |
| S3 | 0.22902 |  |  |



|    |         |                                                                                    |                                                                                     |
|----|---------|------------------------------------------------------------------------------------|-------------------------------------------------------------------------------------|
| S4 | 0.84023 | 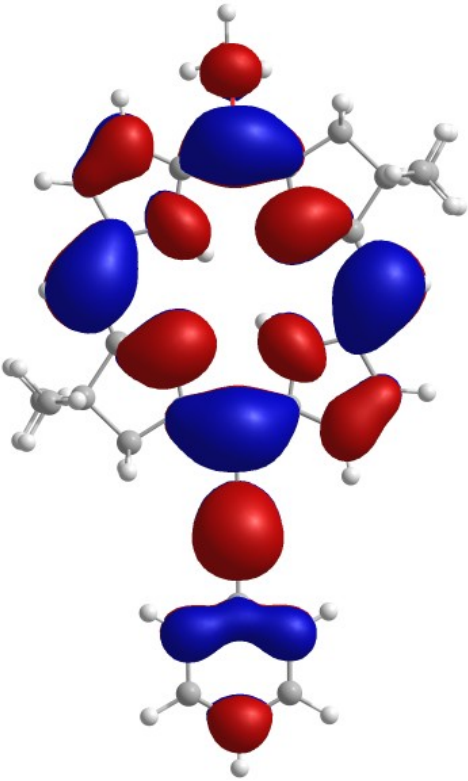  |   |
| S4 | 0.16305 |  |  |

|    |         |                                                                                    |                                                                                     |
|----|---------|------------------------------------------------------------------------------------|-------------------------------------------------------------------------------------|
| S5 | 0.83656 | 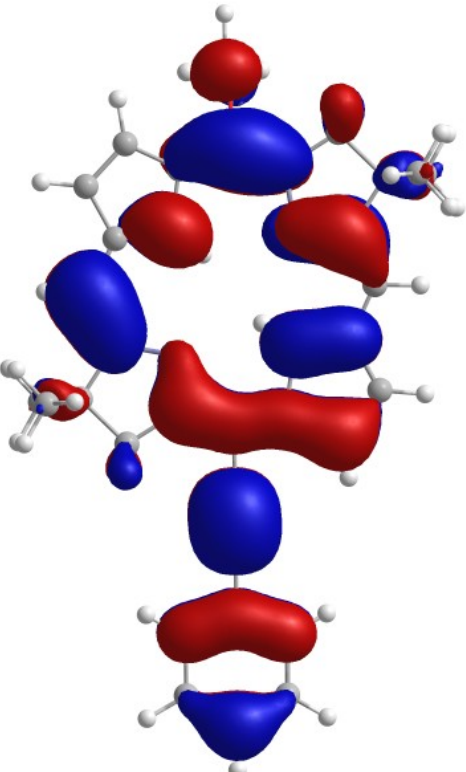  |   |
| S5 | 0.14879 |  |  |

|    |         |                                                                                    |                                                                                     |
|----|---------|------------------------------------------------------------------------------------|-------------------------------------------------------------------------------------|
| S6 | 0.99127 | 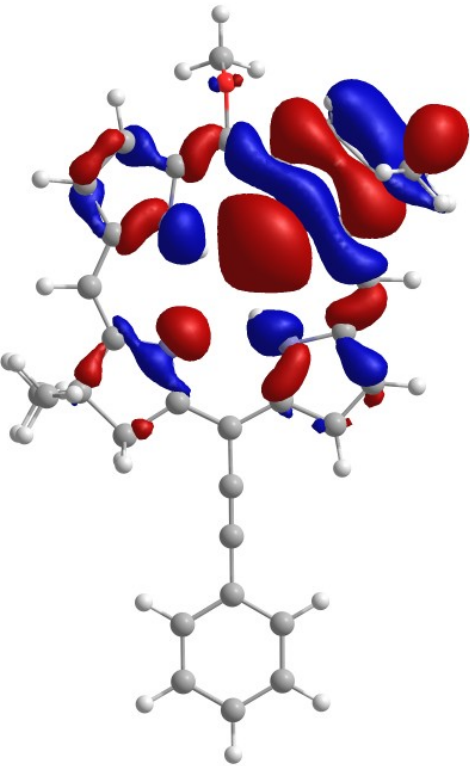  |   |
| S7 | 0.88777 |  |  |

|    |         |                                                                                    |                                                                                     |
|----|---------|------------------------------------------------------------------------------------|-------------------------------------------------------------------------------------|
| S7 | 0.08718 | 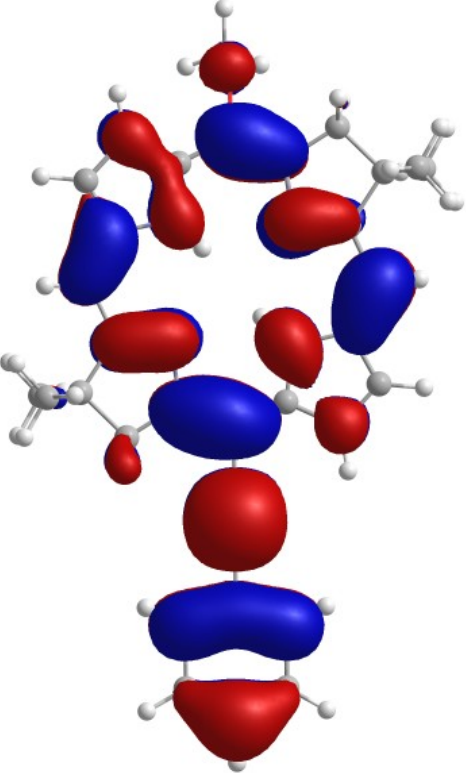  |   |
| S8 | 0.98602 |  |  |



|    |         |                                                                                    |                                                                                     |
|----|---------|------------------------------------------------------------------------------------|-------------------------------------------------------------------------------------|
| S9 | 0.88684 | 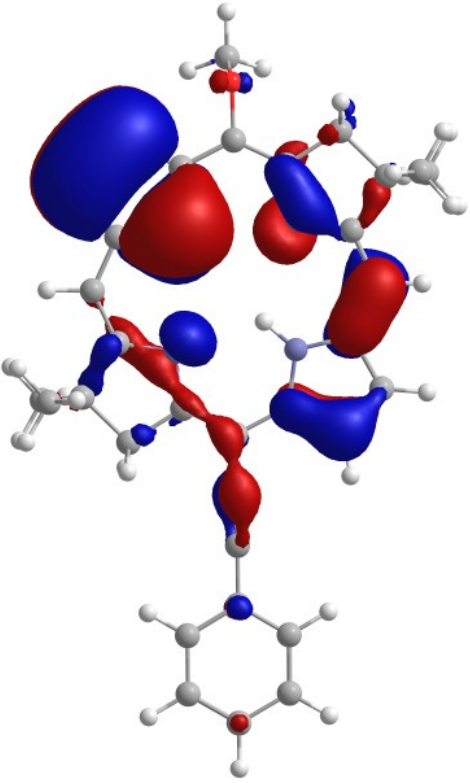  |   |
| S9 | 0.07873 |  |  |

|     |         |                                                                                    |                                                                                     |
|-----|---------|------------------------------------------------------------------------------------|-------------------------------------------------------------------------------------|
| S10 | 0.68442 | 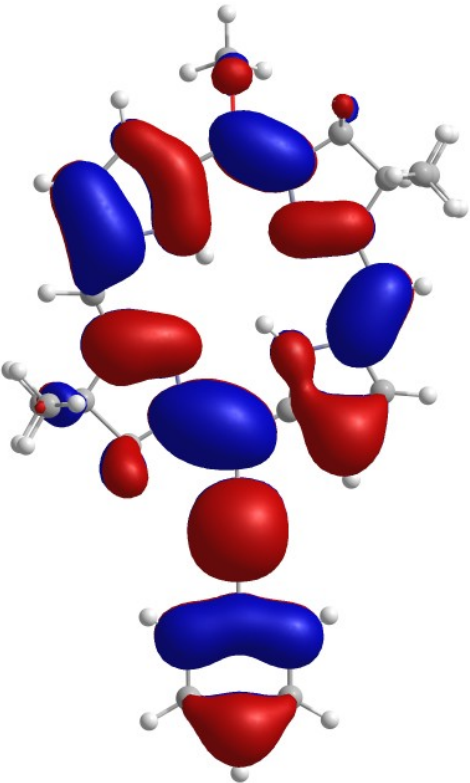  |   |
| S10 | 0.21745 |  |  |

|     |         |                                                                                    |                                                                                     |
|-----|---------|------------------------------------------------------------------------------------|-------------------------------------------------------------------------------------|
| S10 | 0.05889 | 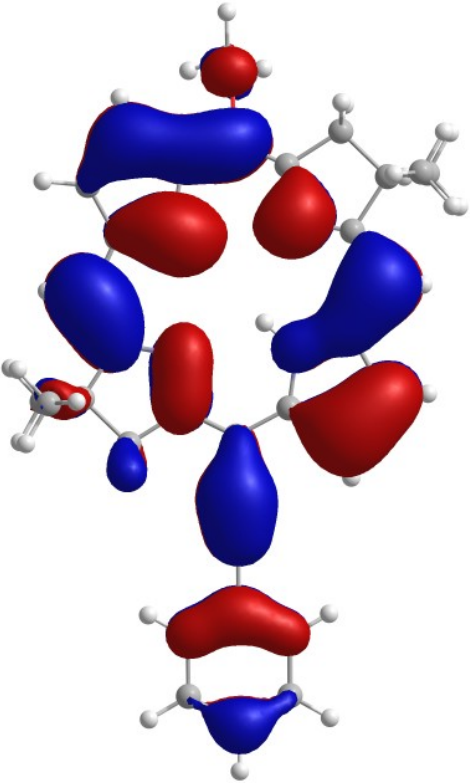  |   |
| S11 | 0.48945 |  |  |

|     |         |                                                                                    |                                                                                     |
|-----|---------|------------------------------------------------------------------------------------|-------------------------------------------------------------------------------------|
| S11 | 0.40633 | 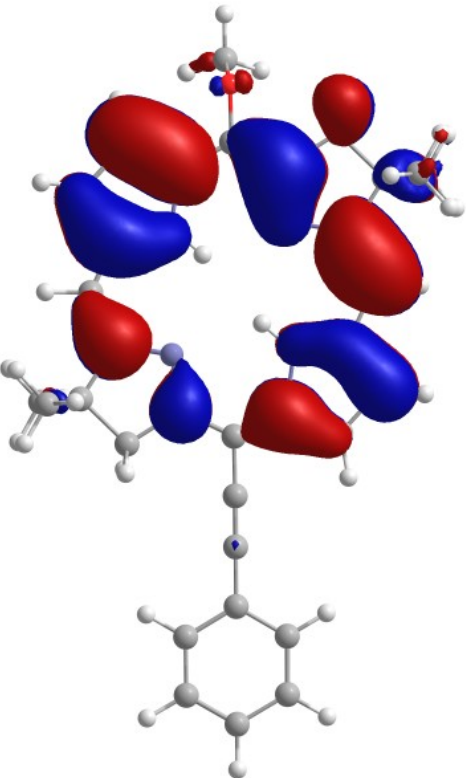  |   |
| S11 | 0.05233 |  |  |



|     |         |                                                                                    |                                                                                     |
|-----|---------|------------------------------------------------------------------------------------|-------------------------------------------------------------------------------------|
| S12 | 0.87902 | 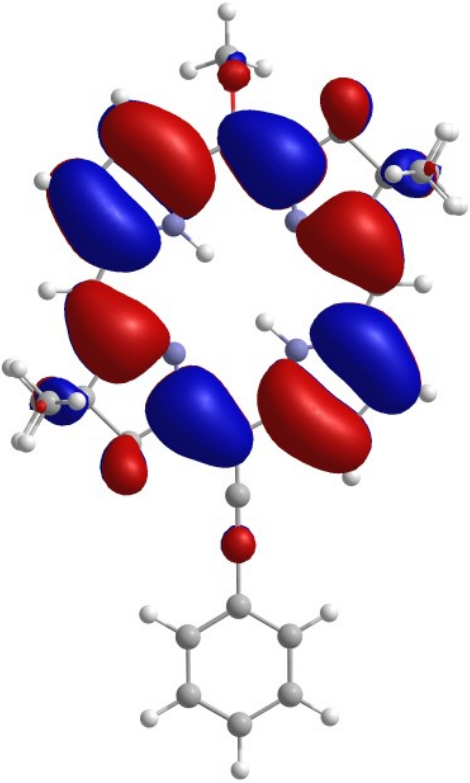  |   |
| S12 | 0.08726 |  |  |

|     |         |                                                                                    |                                                                                     |
|-----|---------|------------------------------------------------------------------------------------|-------------------------------------------------------------------------------------|
| S13 | 0.88332 | 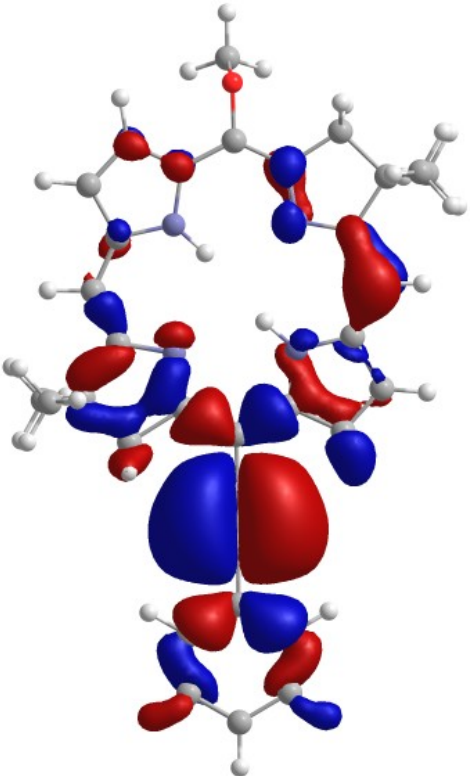  |   |
| S13 | 0.08596 |  |  |

|     |         |                                                                                    |                                                                                     |
|-----|---------|------------------------------------------------------------------------------------|-------------------------------------------------------------------------------------|
| S14 | 0.48636 | 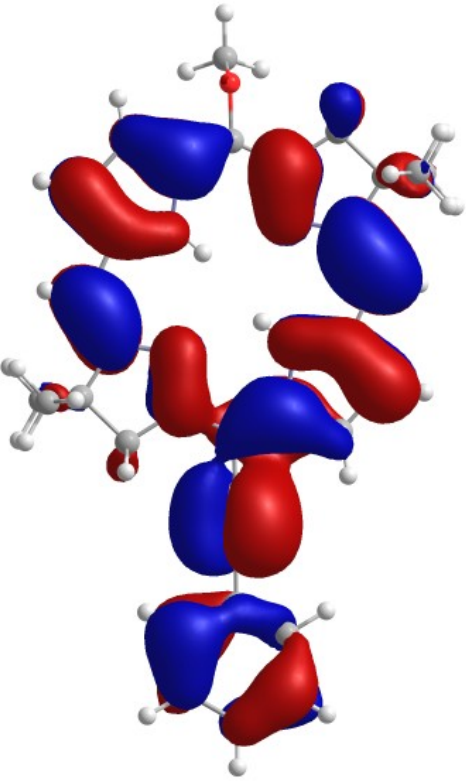  |   |
| S14 | 0.39102 |  |  |

|     |         |                                                                                    |                                                                                     |
|-----|---------|------------------------------------------------------------------------------------|-------------------------------------------------------------------------------------|
| S14 | 0.08086 | 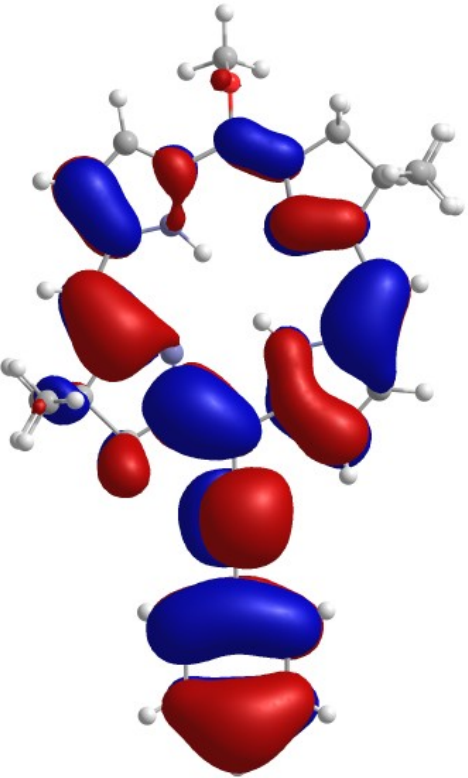  |   |
| S15 | 0.55612 |  |  |



|     |         |                                                                                                                                                                                                                                                                                                                                                                                                         |                                                                                                                                                                                                                                                                                                                                                              |
|-----|---------|---------------------------------------------------------------------------------------------------------------------------------------------------------------------------------------------------------------------------------------------------------------------------------------------------------------------------------------------------------------------------------------------------------|--------------------------------------------------------------------------------------------------------------------------------------------------------------------------------------------------------------------------------------------------------------------------------------------------------------------------------------------------------------|
| S15 | 0.36149 | 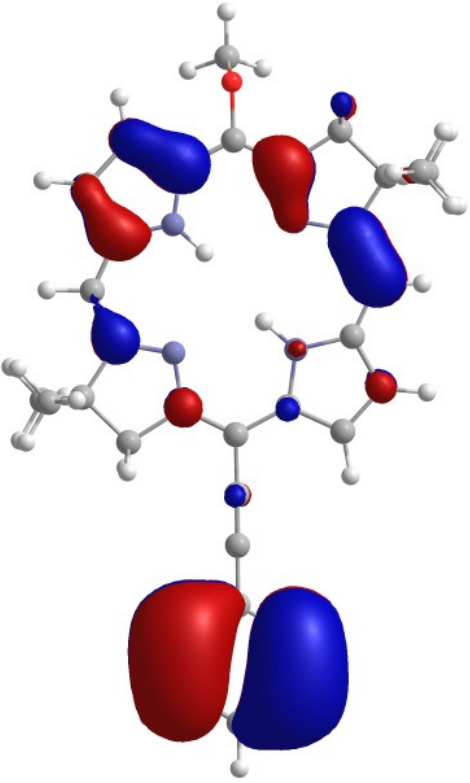 <p>A 3D ball-and-stick model of a complex organic molecule, possibly a nucleotide derivative, with red and blue lobes representing electron density or charge distribution. The molecule is oriented vertically, with a large red lobe at the bottom and several blue lobes distributed throughout the structure.</p> |  <p>A 3D ball-and-stick model of a complex organic molecule, similar to the one in the left panel, with red and blue lobes. The molecule is oriented vertically, with a large red lobe at the bottom and several blue lobes distributed throughout the structure.</p>      |
| S15 | 0.05920 |  <p>A 3D ball-and-stick model of a complex organic molecule, similar to the one in the top-left panel, with red and blue lobes. The molecule is oriented vertically, with a large red lobe at the bottom and several blue lobes distributed throughout the structure.</p>                                             |  <p>A 3D ball-and-stick model of a complex organic molecule, similar to the one in the top-left panel, with red and blue lobes. The molecule is oriented vertically, with a large red lobe at the bottom and several blue lobes distributed throughout the structure.</p> |

|     |         |                                                                                                                                                                                                                                                                                                                                                                                                                                                                                                        |                                                                                                                                                                                                                                                                                                                                                                                                                                                         |
|-----|---------|--------------------------------------------------------------------------------------------------------------------------------------------------------------------------------------------------------------------------------------------------------------------------------------------------------------------------------------------------------------------------------------------------------------------------------------------------------------------------------------------------------|---------------------------------------------------------------------------------------------------------------------------------------------------------------------------------------------------------------------------------------------------------------------------------------------------------------------------------------------------------------------------------------------------------------------------------------------------------|
| S16 | 0.90735 | 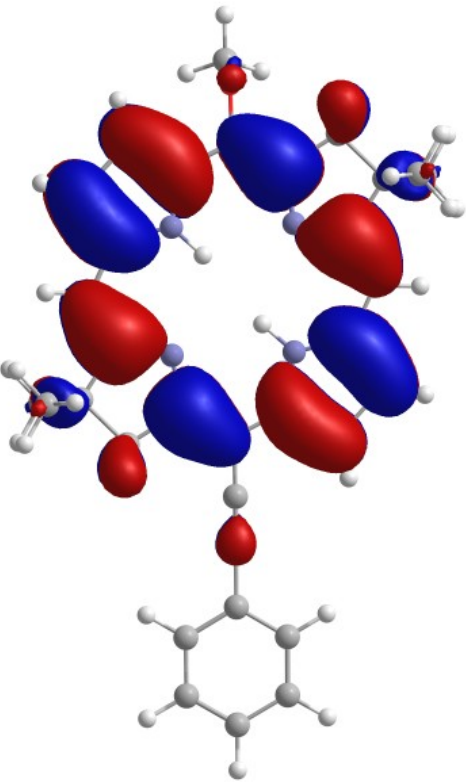 <p>A 3D ball-and-stick model of a complex organic molecule, possibly a nucleotide derivative, with red and blue lobes representing electron density or charge distribution. The molecule features a central ring structure with various substituents, including a phosphate group and a base. The lobes are distributed across the molecule, with a prominent red lobe on the left and a blue lobe on the right.</p> |  <p>A 3D ball-and-stick model of a complex organic molecule, similar to the one in the left panel, with red and blue lobes. The molecule has a more complex, branched structure with a central ring and several side chains. The lobes are distributed across the molecule, with a prominent red lobe on the left and a blue lobe on the right.</p>                   |
| S16 | 0.05767 |  <p>A 3D ball-and-stick model of a complex organic molecule, similar to the one in the top-left panel, with red and blue lobes. The molecule has a central ring structure with various substituents, including a phosphate group and a base. The lobes are distributed across the molecule, with a prominent red lobe on the left and a blue lobe on the right.</p>                                                  |  <p>A 3D ball-and-stick model of a complex organic molecule, similar to the one in the top-right panel, with red and blue lobes. The molecule has a central ring structure with various substituents, including a phosphate group and a base. The lobes are distributed across the molecule, with a prominent red lobe on the left and a blue lobe on the right.</p> |
